# Supplementary material for: A DFT study of the active role of the phosphate group of an internal aldimine in a transamination reaction
Source: Royal Society of Chemistry journal article supplement (doi:10.1039/d2ob00913g), 2022-01-01
Supplement: d2ob00913g1.pdf [file d2ob00913g1.pdf]

## Supplementary Information

### A DFT study of the active role of the phosphate group of an internal aldimine in a transamination reaction

Shinichi Yamabe,<sup>a</sup> Noriko Tsuchida,<sup>b</sup> and Shoko Yamazaki\*<sup>a</sup>

<sup>a</sup>*Department of Chemistry, Nara University of Education, Takabatake-cho, Nara 630-8528, Japan*

<sup>b</sup>*Department of Liberal Arts, Faculty of Medicine, Saitama Medical University, 38 Morohongo, Moroyama-machi, Iruma-gun, Saitama 350-0495, Japan*

*email: yamazaks@cc.nara-edu.ac.jp*

|                                                                                                                                                |               |
|------------------------------------------------------------------------------------------------------------------------------------------------|---------------|
| Figure S1. The optimized geometries of species in Scheme 4a.                                                                                   | Pages S2-S4   |
| Figure S2. The optimized geometries of species in Scheme 4b.                                                                                   | Pages S5-S7   |
| Figure S3. The optimized geometries of species in Scheme 4c.                                                                                   | Pages S7-S9   |
| Figure S4. The optimized geometries of species in Scheme 4d.                                                                                   | Pages S10-S12 |
| Figure S5. Two conformations (a) and (b) of the external aldimine in Int3 of Scheme 4b.                                                        | Page S13      |
| Figure S6. The direct proton-transfer TS, TS (Int 3 → Int9), where Int3 is the external aldimine <C> and Int9 is the ketimine <E> in Scheme 2. | Page S14      |
| Cartesian coordinates and energies                                                                                                             | Pages S15-S59 |

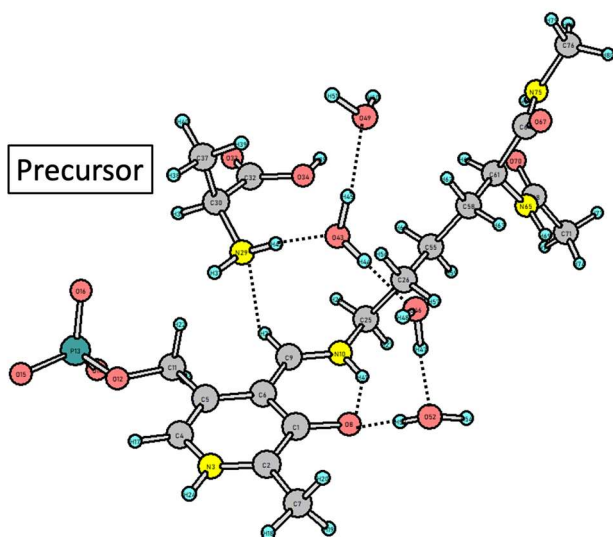

$$\Delta(E_T+ZPE) = 0 \text{ kcal/mol}$$

$$\Delta G^\circ = 0 \text{ kcal/mol}$$

$$[\Delta G^\circ = 0 \text{ kcal/mol}]$$

$$\langle \Delta G^\circ = 0 \text{ kcal/mol} \rangle$$

**Figure S1-1**

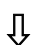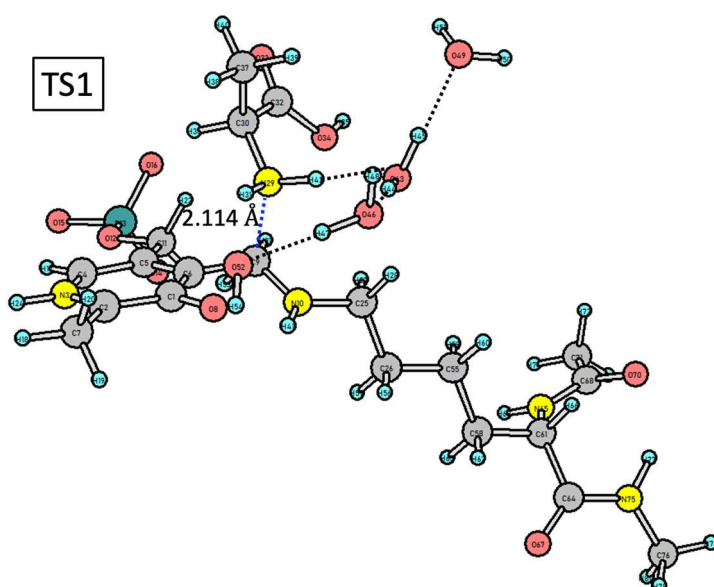

$$\Delta(E_T+ZPE)^\ddagger = +14.11 \text{ kcal/mol}$$

$$\Delta G^\ddagger = +12.00 \text{ kcal/mol}$$

$$[\Delta G^\ddagger = +12.70 \text{ kcal/mol}]$$

$$\langle \Delta G^\ddagger = +12.00 \text{ kcal/mol} \rangle$$

$$v^\ddagger = 153.0955i \text{ cm}^{-1}$$

**Figure S1-2**

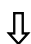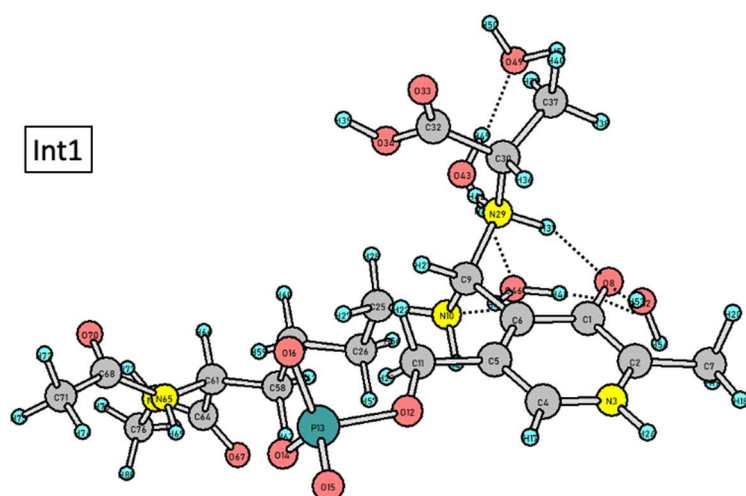

$$\Delta(E_T+ZPE) = +4.58 \text{ kcal/mol}$$

$$\Delta G^\circ = +3.10 \text{ kcal/mol}$$

$$[\Delta G^\circ = +3.52 \text{ kcal/mol}]$$

$$\langle \Delta G^\circ = +4.34 \text{ kcal/mol} \rangle$$

**Figure S1-3**

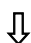

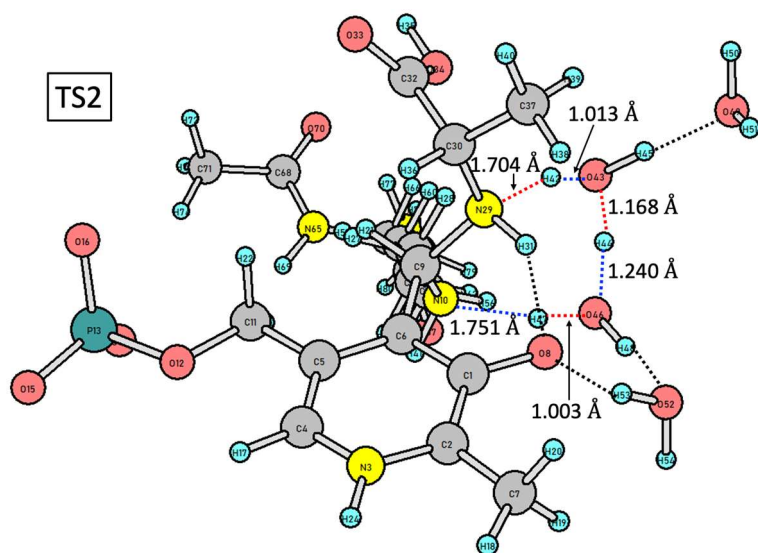

$$\Delta(E_T+ZPE)^\ddagger = +12.64 \text{ kcal/mol}$$

$$\Delta G^\ddagger = +12.53 \text{ kcal/mol}$$

$$[\Delta G^\ddagger = +10.25 \text{ kcal/mol}]$$

$$\langle \Delta G^\ddagger = +10.45 \text{ kcal/mol} \rangle$$

$$v^\ddagger = 551.7132i \text{ cm}^{-1}$$

**Figure S1-4**

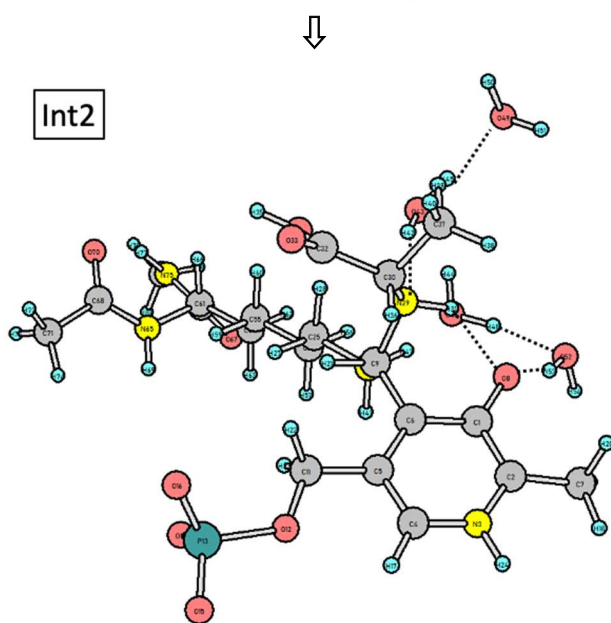

$$\Delta(E_T+ZPE) = +6.59 \text{ kcal/mol}$$

$$\Delta G^0 = +5.77 \text{ kcal/mol}$$

$$[\Delta G^0 = +5.35 \text{ kcal/mol}]$$

$$\langle \Delta G^0 = +7.46 \text{ kcal/mol} \rangle$$

**Figure S1-5**

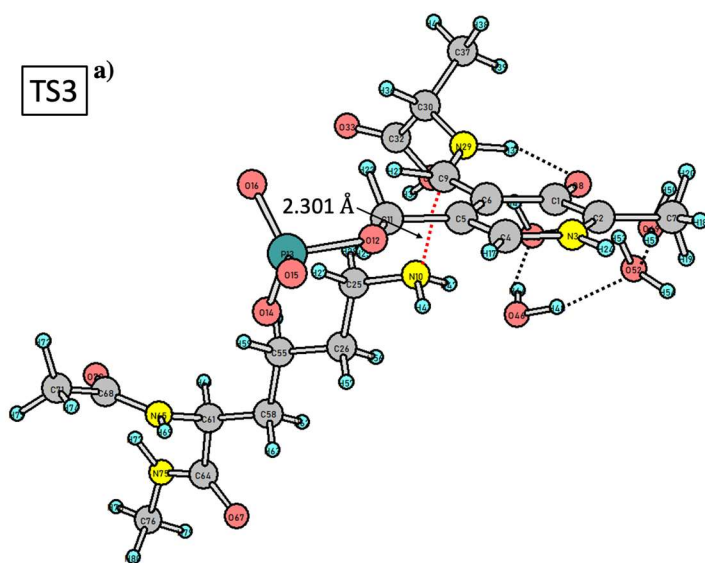

$$\Delta(E_T+ZPE)^\ddagger = +17.41 \text{ kcal/mol}$$

$$\Delta G^\ddagger = +16.33 \text{ kcal/mol}$$

$$[\Delta G^\ddagger = +18.50 \text{ kcal/mol}]$$

$$\langle \Delta G^\ddagger = +16.31 \text{ kcal/mol} \rangle$$

$$v^\ddagger = 45.9492i \text{ cm}^{-1}$$

**Figure S1-6**

Figure S1. The optimized geometries of species in Scheme 4a (from Precursor to TS3). At TSs, red and blue broken lines stand for covalent bonds cleaved and formed, respectively. All the Cartesian

coordinates and energies corresponding to those geometries are shown at the end of Supplementary Information.  $\Delta G$ ,  $[\Delta G]$  and  $\langle \Delta G \rangle$  values are by DFT = wB97X-D, M06-2X and APF-D in DFT/6-311+G(d,p) SCRF=(PCM,solvent=water)//wB97X-D/6-311+G(d,p) SCRF=(PCM,solvent=water), respectively.

a) The optimized geometry of TS3 by wB97x-D/6-311+G(d,p) SCRF=(PCM,solvent=water) could not be obtained in spite of many attempts. Alternatively, by B3LYP/6-31G(d) SCRF=(PCM,solvent=water), it was successfully obtained. Then, a single-point calculation of wB97x-D/6-311+G(d,p) SCRF=(PCM,solvent=water)//B3LYP/6-31G(d) SCRF=(PCM,solvent=water) was carried out. The ( $E_T + ZPE$ ) and  $G$  values of TS3 were obtained by the sum of wB97x-D/6-311+G(d,p) electronic energy ( $E_T$ ) and B3LYP/6-31G(d) zero-point vibrational energy (ZPE) and by that of  $E_T$  and B3LYP/6-31G(d) thermal correction, respectively.

TS3 in **Figure S1-6**

Int3

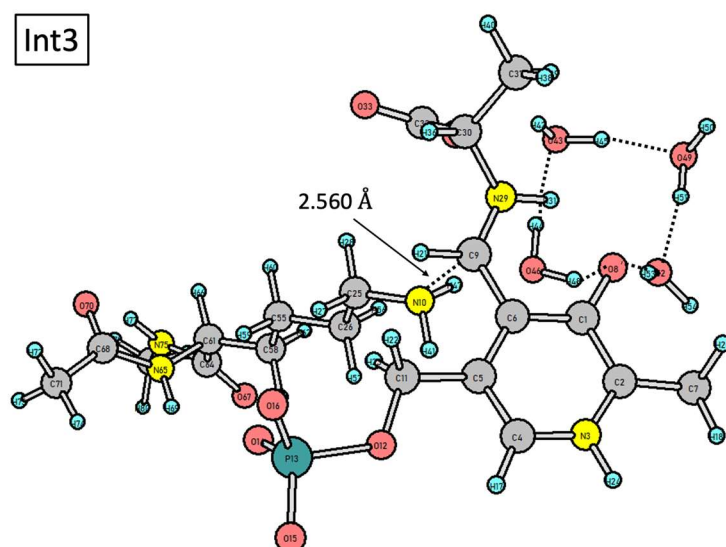

$$\Delta(E_T+ZPE) = +15.64 \text{ kcal/mol}$$

$$\Delta G^\circ = +13.68 \text{ kcal/mol}$$

$$[\Delta G^\circ = +15.22 \text{ kcal/mol}]$$

$$\langle \Delta G^\circ = +14.81 \text{ kcal/mol} \rangle$$

**Figure S2-1**

TS4

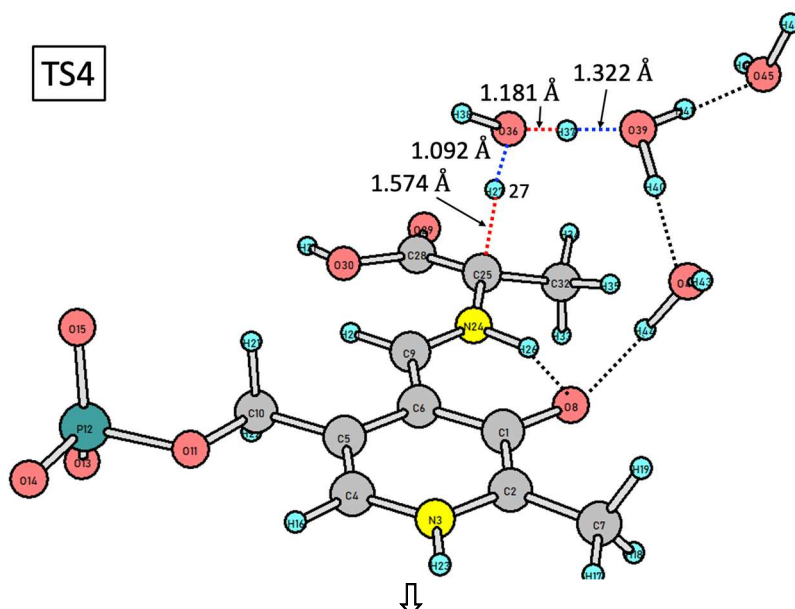

$$\Delta(E_T+ZPE)^\ddagger = +45.65 \text{ kcal/mol}$$

$$\Delta G^\ddagger = +43.20 \text{ kcal/mol}$$

$$[\Delta G^\ddagger = +42.84 \text{ kcal/mol}]$$

$$\langle \Delta G^\ddagger = +39.18 \text{ kcal/mol} \rangle$$

$$v^\ddagger = 741.2181i \text{ cm}^{-1}$$

**Figure S2-2**

Int4

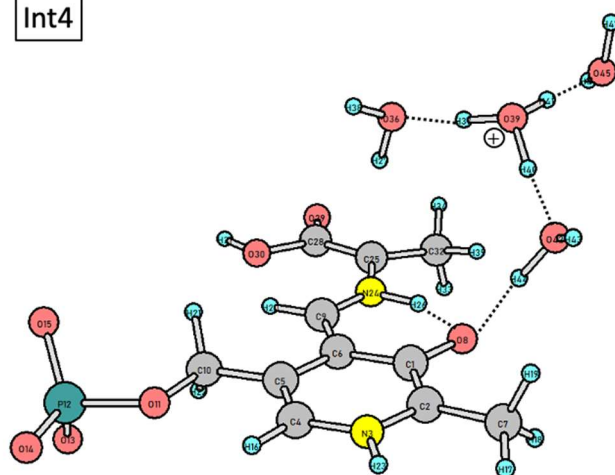

$$\Delta(E_T+ZPE) = +42.17 \text{ kcal/mol}$$

$$\Delta G^\circ = +39.96 \text{ kcal/mol}$$

$$[\Delta G^\circ = +38.81 \text{ kcal/mol}]$$

$$\langle \Delta G^\circ = +35.06 \text{ kcal/mol} \rangle$$

**Figure S2-3**

Int3 in Figure S2-1

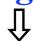

TS5

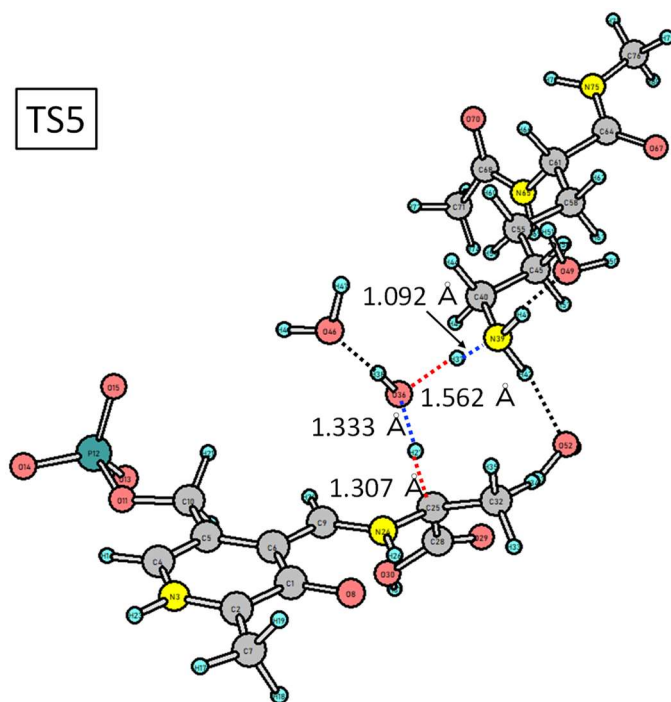

$$\Delta(E_T+ZPE)^\ddagger = +23.61 \text{ kcal/mol}$$

$$\Delta G^\ddagger = +20.93 \text{ kcal/mol}$$

$$[\Delta G^\ddagger = +21.95 \text{ kcal/mol}]$$

$$\langle \Delta G^\ddagger = +18.12 \text{ kcal/mol} \rangle$$

$$v^\ddagger = 1154.0598i \text{ cm}^{-1}$$

Figure S2-4

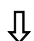

Int5

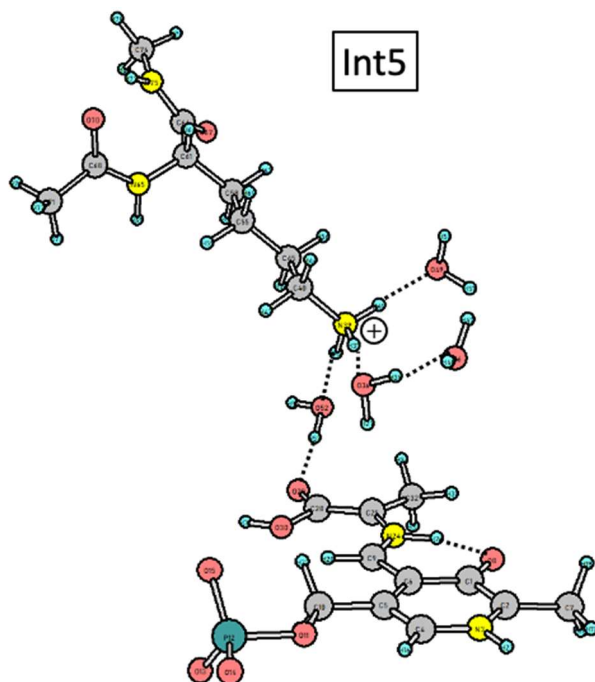

$$\Delta(E_T+ZPE) = +11.73 \text{ kcal/mol}$$

$$\Delta G^\circ = +11.92 \text{ kcal/mol}$$

$$[\Delta G^\circ = +12.80 \text{ kcal/mol}]$$

$$\langle \Delta G^\circ = +7.17 \text{ kcal/mol} \rangle$$

Figure S2-5

Int3 in Figure S2-1

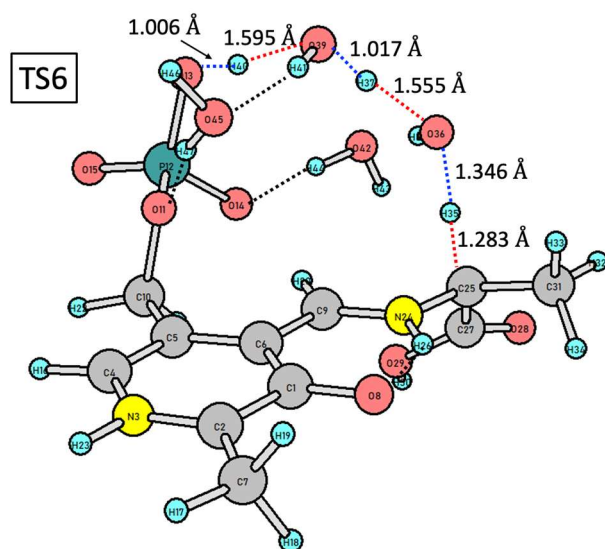

$$\Delta(E_T+ZPE)^\ddagger = +19.00 \text{ kcal/mol}$$

$$\Delta G^\ddagger = +20.40 \text{ kcal/mol}$$

$$[\Delta G^\ddagger = +19.73 \text{ kcal/mol}]$$

$$\langle \Delta G^\ddagger = +16.11 \text{ kcal/mol} \rangle$$

$$v^\ddagger = 1006.6264i \text{ cm}^{-1}$$

Figure S2-6

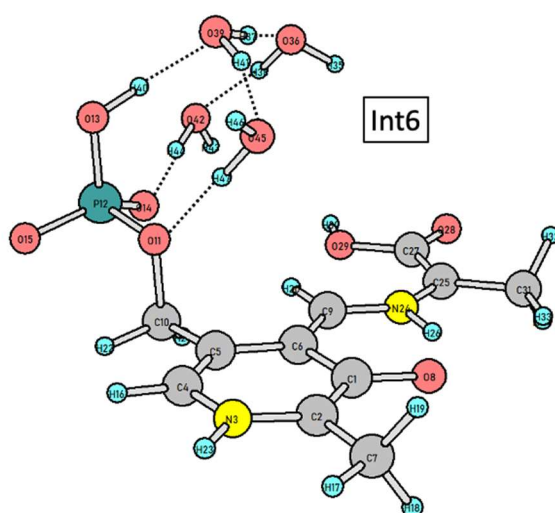

$$\Delta(E_T+ZPE) = +1.31 \text{ kcal/mol}$$

$$\Delta G^\circ = +1.89 \text{ kcal/mol}$$

$$[\Delta G^\circ = -1.59 \text{ kcal/mol}]$$

$$\langle \Delta G^\circ = -5.07 \text{ kcal/mol} \rangle$$

Figure S2-7

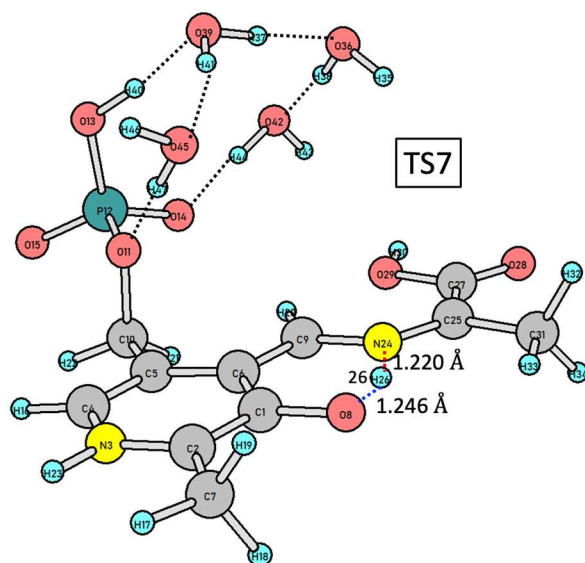

$$\Delta(E_T+ZPE)^\ddagger = -0.07 \text{ kcal/mol}$$

$$\Delta G^\ddagger = +0.48 \text{ kcal/mol}$$

$$[\Delta G^\ddagger = -4.62 \text{ kcal/mol}]$$

$$\langle \Delta G^\ddagger = -6.99 \text{ kcal/mol} \rangle$$

$$v^\ddagger = 1076.4290i \text{ cm}^{-1}$$

Figure S2-8

Figure S2. The optimized geometries of species in Scheme 4b (from Int3 to TS7).



TS7 in Figure S2-8

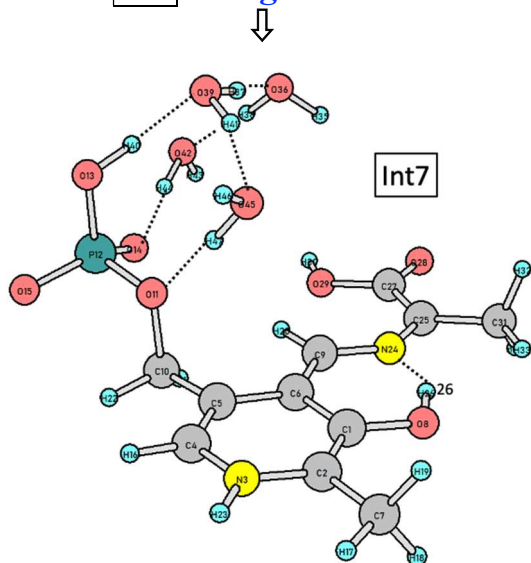

$$\Delta(E_T+ZPE) = -1.49 \text{ kcal/mol}$$

$$\Delta G^\circ = -1.83 \text{ kcal/mol}$$

$$[\Delta G^\circ = -7.13 \text{ kcal/mol}]$$

$$\langle \Delta G^\circ = -7.18 \text{ kcal/mol} \rangle$$

Figure S3-1

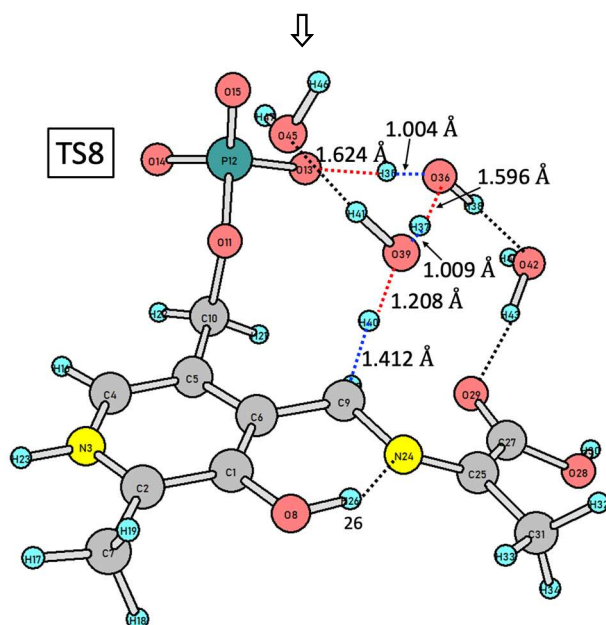

$$\Delta(E_T+ZPE)^\ddagger = +25.42 \text{ kcal/mol}$$

$$\Delta G^\ddagger = +26.85 \text{ kcal/mol}$$

$$[\Delta G^\ddagger = +24.26 \text{ kcal/mol}]$$

$$\langle \Delta G^\ddagger = +21.46 \text{ kcal/mol} \rangle$$

$$v^\ddagger = 1394.2219i \text{ cm}^{-1}$$

Figure S3-2

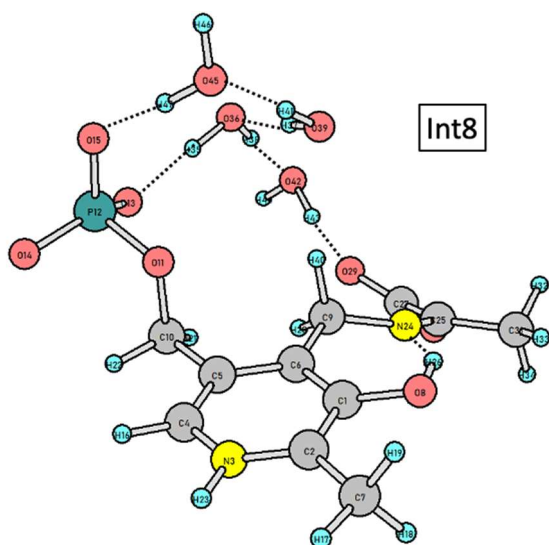

$$\Delta(E_T+ZPE) = +13.50 \text{ kcal/mol}$$

$$\Delta G^\circ = +11.87 \text{ kcal/mol}$$

$$[\Delta G^\circ = +11.80 \text{ kcal/mol}]$$

$$\langle \Delta G^\circ = +13.64 \text{ kcal/mol} \rangle$$

Figure S3-3



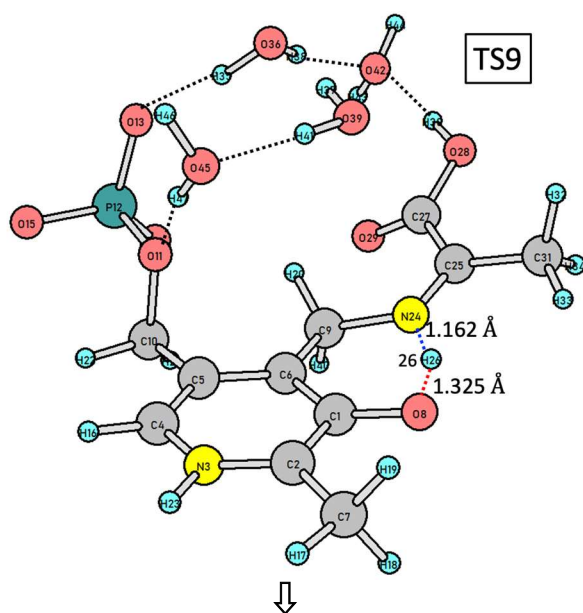

$$\Delta(E_T+ZPE)^\ddagger = +12.38 \text{ kcal/mol}$$

$$\Delta G^\ddagger = +11.91 \text{ kcal/mol}$$

$$[\Delta G^\ddagger = +10.64 \text{ kcal/mol}]$$

$$\langle \Delta G^\ddagger = +11.58 \text{ kcal/mol} \rangle$$

$$v^\ddagger = 573.7087i \text{ cm}^{-1}$$

**Figure S3-4**

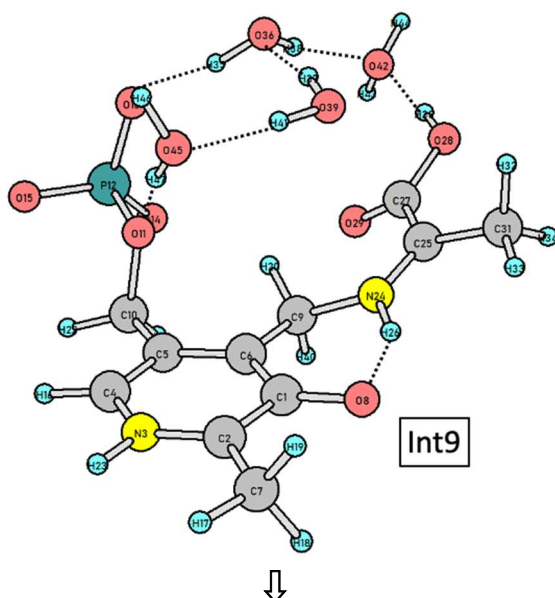

$$\Delta(E_T+ZPE) = +13.84 \text{ kcal/mol}$$

$$\Delta G^\circ = +13.28 \text{ kcal/mol}$$

$$[\Delta G^\circ = +12.66 \text{ kcal/mol}]$$

$$\langle \Delta G^\circ = +13.16 \text{ kcal/mol} \rangle$$

**Figure S3-5**

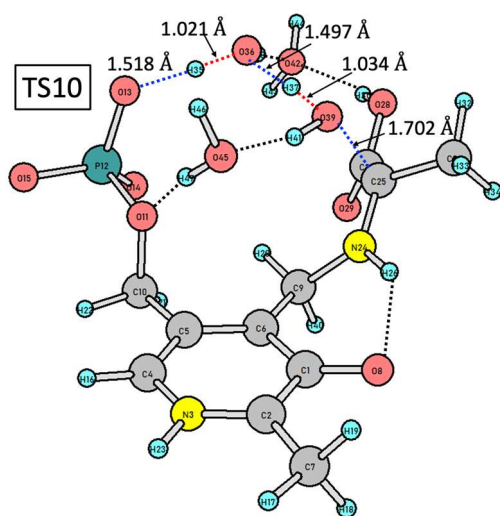

$$\Delta(E_T+ZPE)^\ddagger = +23.59 \text{ kcal/mol}$$

$$\Delta G^\ddagger = +25.38 \text{ kcal/mol}$$

$$[\Delta G^\ddagger = +21.87 \text{ kcal/mol}]$$

$$\langle \Delta G^\ddagger = +22.18 \text{ kcal/mol} \rangle$$

$$v^\ddagger = 161.4793i \text{ cm}^{-1}$$

**Figure S3-6**

Figure S3. The optimized geometries of species in Scheme 4c (from Int7 to TS10).

TS10 in Figure S3-6

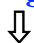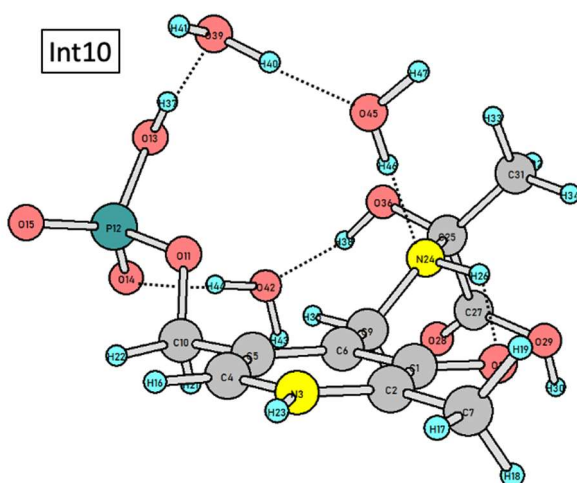

$$\Delta(E_T+ZPE) = -3.19 \text{ kcal/mol}$$

$$\Delta G^\circ = -3.02 \text{ kcal/mol}$$

$$[\Delta G^\circ = -6.72 \text{ kcal/mol}]$$

$$\langle \Delta G^\circ = -3.07 \text{ kcal/mol} \rangle$$

Figure S4-1

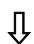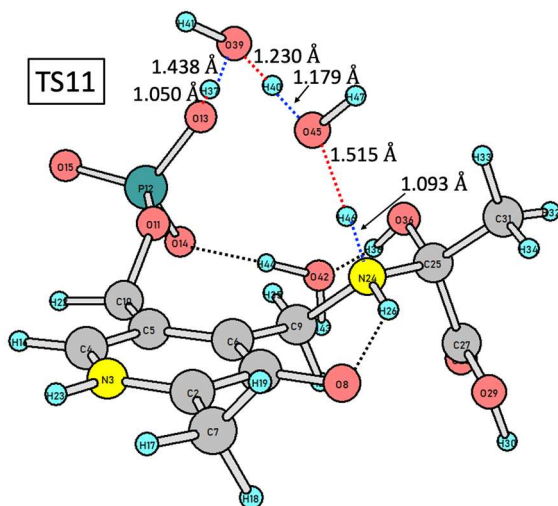

$$\Delta(E_T+ZPE)^\ddagger = +5.83 \text{ kcal/mol}$$

$$\Delta G^\ddagger = +7.96 \text{ kcal/mol}$$

$$[\Delta G^\ddagger = +4.13 \text{ kcal/mol}]$$

$$\langle \Delta G^\ddagger = +4.69 \text{ kcal/mol} \rangle$$

$$v^\ddagger = 828.6060i \text{ cm}^{-1}$$

Figure S4-2

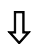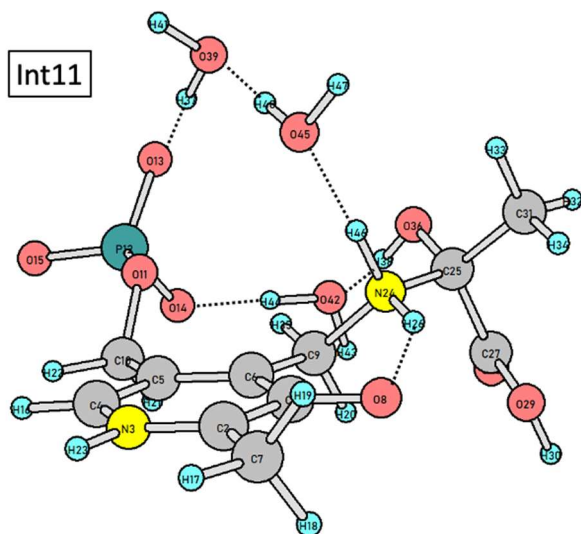

$$\Delta(E_T+ZPE) = +1.71 \text{ kcal/mol}$$

$$\Delta G^\circ = +2.54 \text{ kcal/mol}$$

$$[\Delta G^\circ = +0.97 \text{ kcal/mol}]$$

$$\langle \Delta G^\circ = +1.34 \text{ kcal/mol} \rangle$$

Figure S4-3

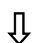

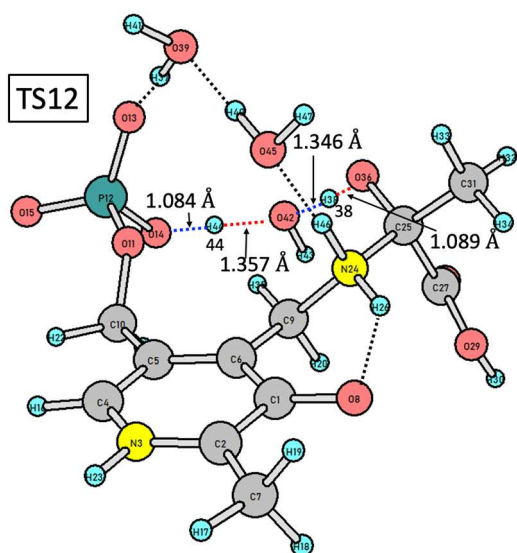

$$\Delta(E_T+ZPE)^\ddagger = +2.75 \text{ kcal/mol}$$

$$\Delta G^\ddagger = +4.43 \text{ kcal/mol}$$

$$[\Delta G^\ddagger = +0.69 \text{ kcal/mol}]$$

$$\langle \Delta G^\ddagger = +1.75 \text{ kcal/mol} \rangle$$

$$v^\ddagger = 401.4243i \text{ cm}^{-1}$$

**Figure S4-4**

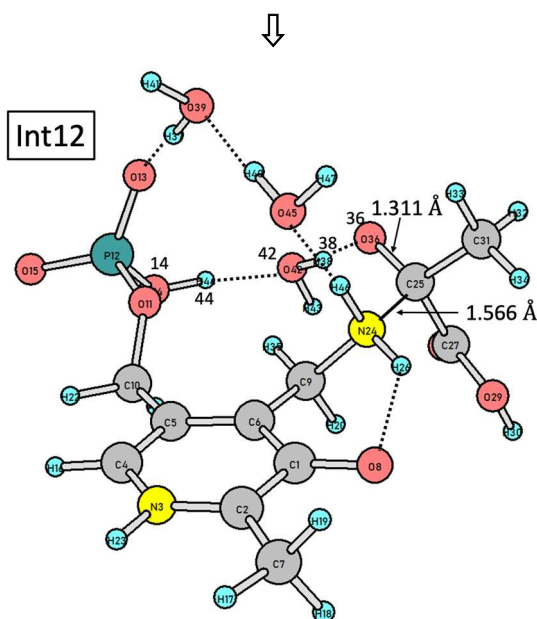

$$\Delta(E_T+ZPE) = +1.80 \text{ kcal/mol}$$

$$\Delta G^\circ = +2.93 \text{ kcal/mol}$$

$$[\Delta G^\circ = +0.76 \text{ kcal/mol}]$$

$$\langle \Delta G^\circ = +1.97 \text{ kcal/mol} \rangle$$

**Figure S4-5**

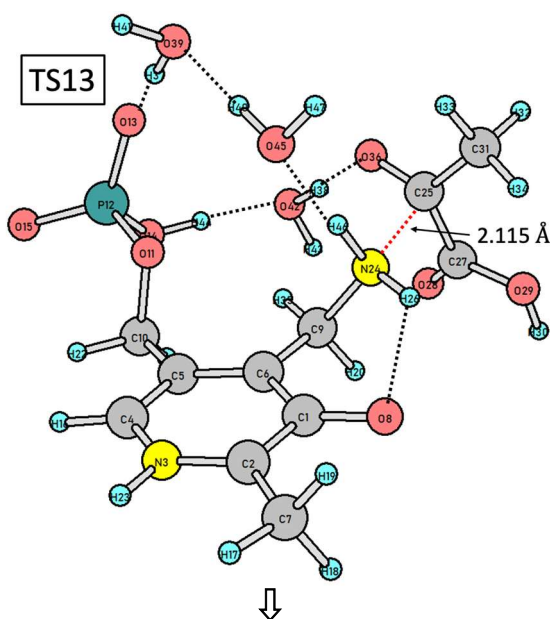

$$\Delta(E_T+ZPE)^\ddagger = +6.19 \text{ kcal/mol}$$

$$\Delta G^\ddagger = +6.00 \text{ kcal/mol}$$

$$[\Delta G^\ddagger = +4.65 \text{ kcal/mol}]$$

$$\langle \Delta G^\ddagger = +5.39 \text{ kcal/mol} \rangle$$

$$v^\ddagger = 108.4551i \text{ cm}^{-1}$$

**Figure S4-6**

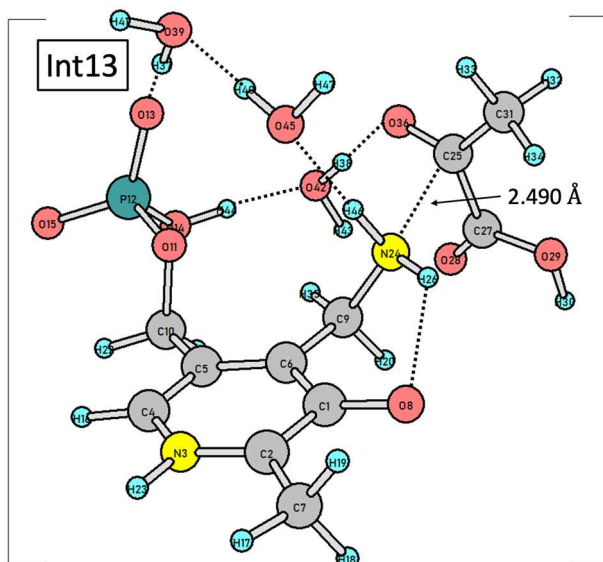

$$\Delta(E_T+ZPE) = +5.45 \text{ kcal/mol}$$

$$\Delta G^\circ = +3.33 \text{ kcal/mol}$$

$$[\Delta G^\circ = +2.29 \text{ kcal/mol}]$$

$$\langle \Delta G^\circ = +4.46 \text{ kcal/mol} \rangle$$

**Figure S4-7**

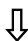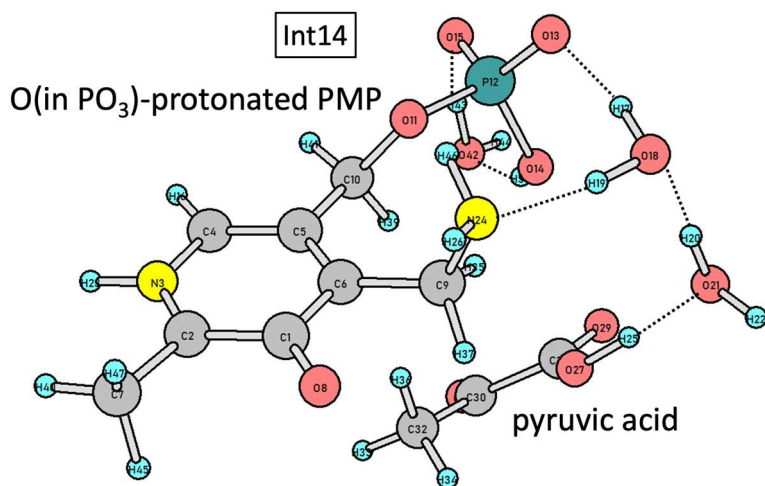

$$\Delta(E_T+ZPE) = -0.79 \text{ kcal/mol}$$

$$\Delta G^\circ = -2.17 \text{ kcal/mol}$$

$$[\Delta G^\circ = -3.39 \text{ kcal/mol}]$$

$$\langle \Delta G^\circ = -1.21 \text{ kcal/mol} \rangle$$

**Figure S4-8**

Figure S4. The optimized geometries of species in Scheme 4d (from Int10 to Int14).

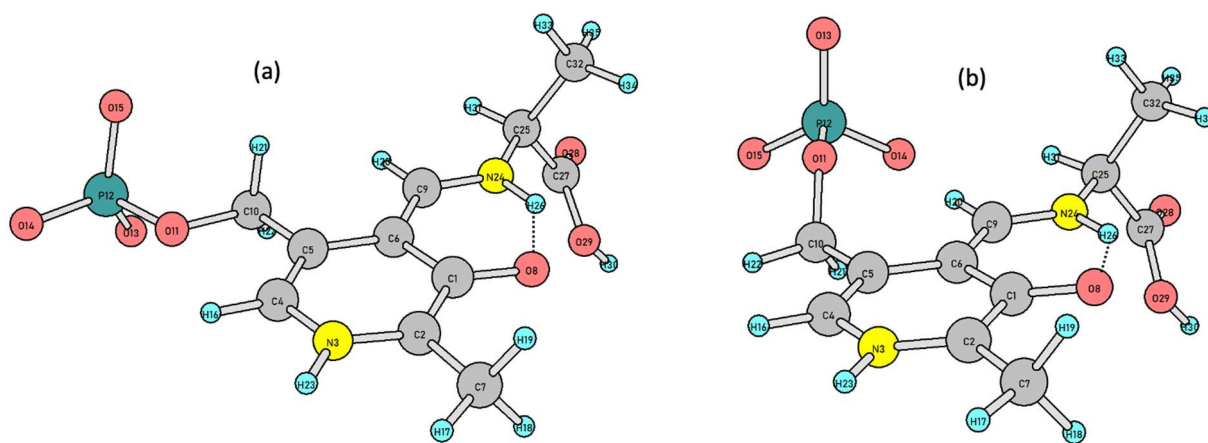

Figure S5. Two conformations (a) and (b) of the external aldimine in Int3 of Scheme 4b. (b) is 2.85 kcal/mol in ( $E_T + ZPE$ ) or 2.22 kcal/mol in  $G^\circ$  more stable than (a).

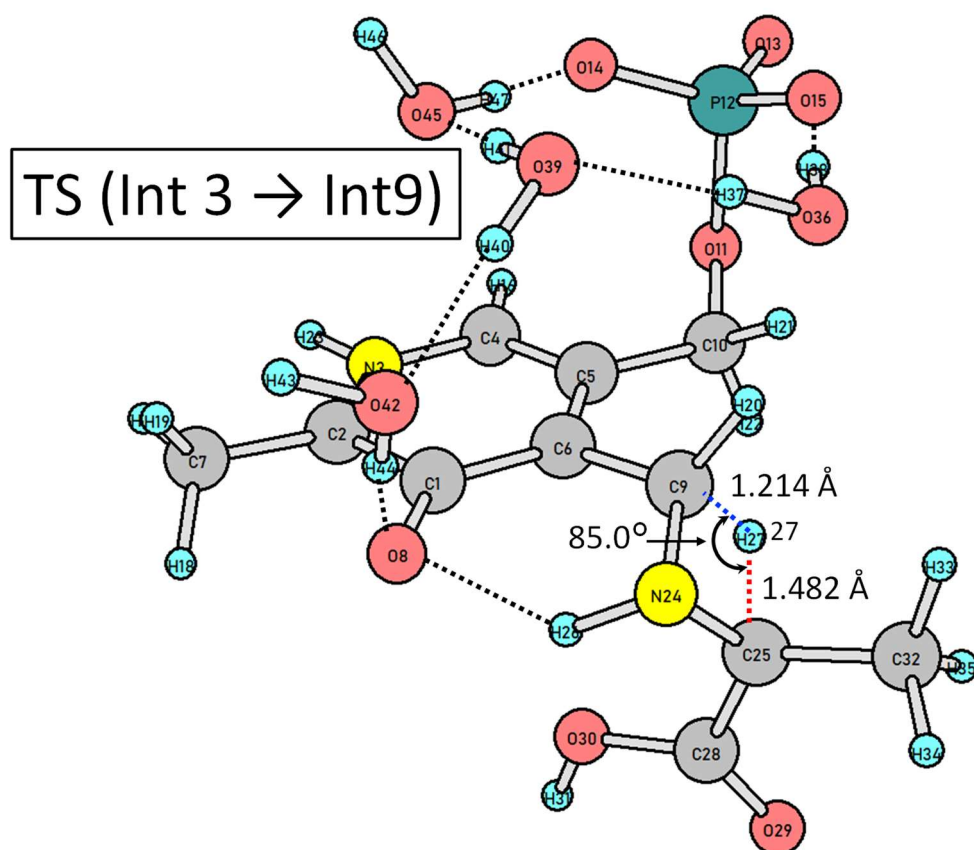

$$\Delta G^\ddagger = +70.78 \text{ kcal/mol}$$

$$v^\ddagger = 464.3921i \text{ cm}^{-1}$$

Figure S6. The direct proton-transfer TS, TS (Int 3 → Int9), where Int3 is the external aldimine <C> and Int9 is the ketimine <E> in Scheme 2.

Cartesian coordinates and energies calculated by wb97x-D/6-311+G(d,p) with SCRF=(PCM, solvent=water)

==== [PLP-model] defined in Scheme 3====

The energy "Sum of electronic and zero-point Energies  
= -668.870782 a.u."  
of this [PLP-model] was added to (ET + ZPE)s of systems  
with stoichiometry C11H22N2O11P(1-),  
C11H22N2O11P(1-) + C9H19N3O2 = C20H41N5O13P(1-),  
in order to show overall energy changes in Scheme 4.

plp.high.log

Stoichiometry C9H19N3O2

Standard orientation:

| Center<br>Number | Atomic<br>Number | Atomic<br>Type | Coordinates (Angstroms) |           |           |
|------------------|------------------|----------------|-------------------------|-----------|-----------|
|                  |                  |                | X                       | Y         | Z         |
| 1                | 7                | 0              | 5.795430                | -0.224373 | -0.040477 |
| 2                | 6                | 0              | 4.461286                | 0.279400  | -0.369902 |
| 3                | 6                | 0              | 3.295769                | -0.589415 | 0.103513  |
| 4                | 1                | 0              | 4.363566                | 1.282319  | 0.059367  |
| 5                | 1                | 0              | 4.404929                | 0.400665  | -1.456987 |
| 6                | 1                | 0              | 5.883325                | -0.334853 | 0.964467  |
| 7                | 1                | 0              | 5.922026                | -1.149764 | -0.437278 |
| 8                | 6                | 0              | 1.935356                | -0.006576 | -0.270108 |
| 9                | 1                | 0              | 3.398803                | -1.592458 | -0.329131 |
| 10               | 1                | 0              | 3.358251                | -0.708561 | 1.192485  |
| 11               | 6                | 0              | 0.776081                | -0.882769 | 0.198683  |
| 12               | 1                | 0              | 1.842966                | 0.997592  | 0.159023  |
| 13               | 1                | 0              | 1.876929                | 0.115522  | -1.358679 |
| 14               | 6                | 0              | -0.587011               | -0.319038 | -0.178525 |
| 15               | 1                | 0              | 0.863004                | -1.877414 | -0.246723 |
| 16               | 1                | 0              | 0.822859                | -1.028309 | 1.283626  |
| 17               | 6                | 0              | -1.734219               | -1.302274 | 0.127661  |
| 18               | 7                | 0              | -0.824729               | 0.950607  | 0.499211  |
| 19               | 1                | 0              | -0.608798               | -0.108861 | -1.251978 |
| 20               | 8                | 0              | -1.592055               | -2.282522 | 0.850886  |
| 21               | 6                | 0              | -1.566352               | 1.946286  | -0.027822 |
| 22               | 1                | 0              | -0.396051               | 1.088880  | 1.401300  |
| 23               | 8                | 0              | -2.157448               | 1.819858  | -1.101483 |
| 24               | 6                | 0              | -1.635688               | 3.224620  | 0.766388  |
| 25               | 1                | 0              | -1.235050               | 4.034155  | 0.153403  |
| 26               | 1                | 0              | -2.682521               | 3.450159  | 0.976135  |
| 27               | 1                | 0              | -1.081812               | 3.179743  | 1.704010  |
| 28               | 7                | 0              | -2.897958               | -0.984998 | -0.463907 |
| 29               | 6                | 0              | -4.113733               | -1.738111 | -0.228234 |
| 30               | 1                | 0              | -2.938167               | -0.114494 | -0.980887 |
| 31               | 1                | 0              | -4.903424               | -1.328252 | -0.855649 |
| 32               | 1                | 0              | -3.969256               | -2.789639 | -0.484012 |
| 33               | 1                | 0              | -4.423691               | -1.676501 | 0.818585  |

Standard basis: 6-311+G(d,p) (6D, 7F)

436 basis functions  
55 alpha electrons      55 beta electrons  
nuclear repulsion energy      930.0262684235 Hartrees.  
NAtoms= 33

Force inversion solution in PCM.

Polarizable Continuum Model (PCM)

Model : PCM.

Solvent : Water, Eps= 78.355300 Eps(inf)= 1.777849

SCF Done: E(RwB97XD) = -669.161984902 A.U. after 1 cycles  
NFock= 1 Conv=0.12D-08 -V/T= 2.0051

Zero-point correction= 0.291203 (a.u.)  
Thermal correction to Energy= 0.308530  
Thermal correction to Enthalpy= 0.309474



Thermal correction to Gibbs Free Energy= 0.243867  
 Sum of electronic and zero-point Energies= -668.870782  
 Sum of electronic and thermal Energies= -668.853455  
 Sum of electronic and thermal Enthalpies= -668.852511  
 Sum of electronic and thermal Free Energies= -668.918118

|       | E (Thermal)<br>KCal/Mol | CV<br>Cal/Mol-Kelvin | S<br>Cal/Mol-Kelvin |
|-------|-------------------------|----------------------|---------------------|
| Total | 193.605                 | 60.116               | 138.082             |

| Item                 | Value    | Threshold | Converged? |
|----------------------|----------|-----------|------------|
| Maximum Force        | 0.000028 | 0.000450  | YES        |
| RMS Force            | 0.000004 | 0.000300  | YES        |
| Maximum Displacement | 0.001906 | 0.001800  | NO         |
| RMS Displacement     | 0.000420 | 0.001200  | YES        |

Normal termination of Gaussian 16 at Sat Nov 13 17:58:48 2021.

===== Figure S1 in Scheme 4a=====

-----Figure S1-1, Precursor-----

vita-b6fora.plp.high.log

Stoichiometry C20H41N5O13P(1-)

Standard orientation:

| Center<br>Number | Atomic<br>Number | Atomic<br>Type | Coordinates (Angstroms) |           |           |
|------------------|------------------|----------------|-------------------------|-----------|-----------|
|                  |                  |                | X                       | Y         | Z         |
| 1                | 6                | 0              | 3.697722                | 2.384209  | -0.476932 |
| 2                | 6                | 0              | 5.012210                | 2.450505  | 0.092809  |
| 3                | 7                | 0              | 5.759686                | 1.354809  | 0.082258  |
| 4                | 6                | 0              | 5.396476                | 0.154617  | -0.427494 |
| 5                | 6                | 0              | 4.154935                | 0.007315  | -0.985843 |
| 6                | 6                | 0              | 3.292165                | 1.124900  | -1.012110 |
| 7                | 6                | 0              | 5.529546                | 3.711060  | 0.687713  |
| 8                | 8                | 0              | 2.959733                | 3.421689  | -0.477225 |
| 9                | 6                | 0              | 1.953469                | 0.975814  | -1.534189 |
| 10               | 7                | 0              | 1.113409                | 1.954950  | -1.585727 |
| 11               | 6                | 0              | 3.777716                | -1.342363 | -1.564932 |
| 12               | 8                | 0              | 4.626846                | -2.365185 | -1.126904 |
| 13               | 15               | 0              | 4.099938                | -3.282489 | 0.220604  |
| 14               | 8                | 0              | 2.897713                | -4.078254 | -0.294745 |
| 15               | 8                | 0              | 5.343225                | -4.106577 | 0.535353  |
| 16               | 8                | 0              | 3.725683                | -2.236455 | 1.278136  |
| 17               | 1                | 0              | 6.104486                | -0.653529 | -0.343039 |
| 18               | 1                | 0              | 6.556139                | 3.602337  | 1.037796  |
| 19               | 1                | 0              | 5.486143                | 4.512444  | -0.053118 |
| 20               | 1                | 0              | 4.896958                | 4.012765  | 1.526288  |
| 21               | 1                | 0              | 1.604108                | 0.017259  | -1.900394 |
| 22               | 1                | 0              | 2.734798                | -1.564335 | -1.320257 |
| 23               | 1                | 0              | 3.851271                | -1.272883 | -2.657126 |
| 24               | 1                | 0              | 6.684040                | 1.417634  | 0.495374  |
| 25               | 6                | 0              | -0.279264               | 1.791092  | -1.992561 |
| 26               | 6                | 0              | -1.150940               | 1.500859  | -0.774011 |
| 27               | 1                | 0              | -0.587656               | 2.702217  | -2.507142 |
| 28               | 1                | 0              | -0.324416               | 0.958493  | -2.695888 |
| 29               | 7                | 0              | 1.214182                | -0.883826 | 0.537277  |
| 30               | 6                | 0              | 0.380523                | -2.061126 | 0.338230  |
| 31               | 1                | 0              | 2.116254                | -1.192790 | 0.911600  |
| 32               | 6                | 0              | -0.407324               | -1.948713 | -0.959401 |
| 33               | 8                | 0              | 0.006341                | -1.448296 | -1.981910 |
| 34               | 8                | 0              | -1.616024               | -2.526876 | -0.912759 |
| 35               | 1                | 0              | -2.007121               | -2.470118 | -1.794485 |
| 36               | 1                | 0              | 1.067422                | -2.897871 | 0.125952  |
| 37               | 6                | 0              | -0.479747               | -2.424451 | 1.549872  |
| 38               | 1                | 0              | 0.177402                | -2.565924 | 2.410855  |
| 39               | 1                | 0              | -1.182208               | -1.621742 | 1.792609  |
| 40               | 1                | 0              | -1.045565               | -3.343957 | 1.391582  |
| 41               | 1                | 0              | 1.456783                | 2.845109  | -1.198401 |
| 42               | 1                | 0              | 0.777020                | -0.240435 | 1.195739  |
| 43               | 8                | 0              | -0.184461               | 1.026586  | 2.513708  |
| 44               | 1                | 0              | -0.306155               | 1.960678  | 2.274998  |
| 45               | 1                | 0              | -1.064958               | 0.701588  | 2.765913  |
| 46               | 8                | 0              | -0.436849               | 3.776450  | 1.881354  |
| 47               | 1                | 0              | 0.447769                | 4.192246  | 1.832612  |
| 48               | 1                | 0              | -0.916950               | 4.271388  | 2.548113  |
| 49               | 8                | 0              | -2.663819               | 0.065318  | 3.425332  |

|    |   |   |           |           |           |
|----|---|---|-----------|-----------|-----------|
| 50 | 1 | 0 | -3.403493 | -0.223790 | 2.856781  |
| 51 | 1 | 0 | -2.544058 | -0.640674 | 4.063520  |
| 52 | 8 | 0 | 2.113431  | 4.798653  | 1.679893  |
| 53 | 1 | 0 | 2.503511  | 4.361214  | 0.894009  |
| 54 | 1 | 0 | 2.227535  | 5.740665  | 1.540020  |
| 55 | 6 | 0 | -2.554283 | 1.044232  | -1.155099 |
| 56 | 1 | 0 | -0.660476 | 0.714831  | -0.196121 |
| 57 | 1 | 0 | -1.191598 | 2.378736  | -0.122457 |
| 58 | 6 | 0 | -3.290917 | 0.481627  | 0.057740  |
| 59 | 1 | 0 | -3.117756 | 1.871224  | -1.599628 |
| 60 | 1 | 0 | -2.487102 | 0.263771  | -1.922665 |
| 61 | 6 | 0 | -4.674036 | -0.051478 | -0.283117 |
| 62 | 1 | 0 | -2.709413 | -0.342335 | 0.479275  |
| 63 | 1 | 0 | -3.366371 | 1.239655  | 0.845479  |
| 64 | 6 | 0 | -5.294861 | -0.853351 | 0.874673  |
| 65 | 7 | 0 | -5.560078 | 1.034023  | -0.684084 |
| 66 | 1 | 0 | -4.599263 | -0.729281 | -1.139085 |
| 67 | 8 | 0 | -4.830380 | -0.849604 | 2.016876  |
| 68 | 6 | 0 | -6.565783 | 0.879699  | -1.570586 |
| 69 | 1 | 0 | -5.389934 | 1.947814  | -0.293144 |
| 70 | 8 | 0 | -6.852600 | -0.222495 | -2.040228 |
| 71 | 6 | 0 | -7.321694 | 2.124191  | -1.954442 |
| 72 | 1 | 0 | -7.223085 | 2.268897  | -3.031881 |
| 73 | 1 | 0 | -8.379276 | 1.973138  | -1.732316 |
| 74 | 1 | 0 | -6.969259 | 3.018313  | -1.440637 |
| 75 | 7 | 0 | -6.380473 | -1.557079 | 0.543300  |
| 76 | 6 | 0 | -7.132707 | -2.328007 | 1.514779  |
| 77 | 1 | 0 | -6.722671 | -1.467546 | -0.407163 |
| 78 | 1 | 0 | -7.936356 | -2.847634 | 0.996335  |
| 79 | 1 | 0 | -6.489240 | -3.063211 | 2.001649  |
| 80 | 1 | 0 | -7.563356 | -1.680570 | 2.282566  |

-----  
Standard basis: 6-311+G(d,p) (6D, 7F)

1151 basis functions  
158 alpha electrons      158 beta electrons  
nuclear repulsion energy      5325.0957163069 Hartrees.  
NAtoms= 80 NActive= 80

Force inversion solution in PCM.

-----  
Polarizable Continuum Model (PCM)

=====  
Model                    : PCM.  
Atomic radii            : UFF (Universal Force Field).  
Polarization charges : Total charges.

Solvent : Water, Eps= 78.355300 Eps(inf)= 1.777849  
-----

SCF Done: E(RwB97XD) = -2380.27550752 A.U. after 2 cycles  
NFock= 2 Conv=0.11D-08 -V/T= 2.0042

|                                              |                 |
|----------------------------------------------|-----------------|
| Zero-point correction=                       | 0.660637 (a.u.) |
| Thermal correction to Energy=                | 0.710682        |
| Thermal correction to Enthalpy=              | 0.711626        |
| Thermal correction to Gibbs Free Energy=     | 0.570386        |
| Sum of electronic and zero-point Energies=   | -2379.614871    |
| Sum of electronic and thermal Energies=      | -2379.564826    |
| Sum of electronic and thermal Enthalpies=    | -2379.563882    |
| Sum of electronic and thermal Free Energies= | -2379.705122    |

|       | E (Thermal) | CV             | S              |
|-------|-------------|----------------|----------------|
|       | KCal/Mol    | Cal/Mol-Kelvin | Cal/Mol-Kelvin |
| Total | 445.960     | 177.136        | 297.265        |

| Item                 | Value    | Threshold | Converged? |
|----------------------|----------|-----------|------------|
| Maximum Force        | 0.000112 | 0.000450  | YES        |
| RMS Force            | 0.000013 | 0.000300  | YES        |
| Maximum Displacement | 0.010445 | 0.001800  | NO         |
| RMS Displacement     | 0.002306 | 0.001200  | NO         |

Normal termination of Gaussian 16 at Sun Jan 2 03:32:03 2022.

-----Figure S1-2, TS1-----

vita-b6tsa.plp.high.log

Stoichiometry C20H41N5O13P(1-)

## Standard orientation:

| Center<br>Number | Atomic<br>Number | Atomic<br>Type | Coordinates (Angstroms) |           |           |
|------------------|------------------|----------------|-------------------------|-----------|-----------|
|                  |                  |                | X                       | Y         | Z         |
| 1                | 6                | 0              | -2.422486               | -2.204615 | -1.905761 |
| 2                | 6                | 0              | -3.605193               | -2.622692 | -2.591026 |
| 3                | 7                | 0              | -4.612743               | -1.763154 | -2.714430 |
| 4                | 6                | 0              | -4.623249               | -0.498040 | -2.243775 |
| 5                | 6                | 0              | -3.530156               | -0.029694 | -1.556997 |
| 6                | 6                | 0              | -2.431073               | -0.887011 | -1.368180 |
| 7                | 6                | 0              | -3.717460               | -3.991320 | -3.161603 |
| 8                | 8                | 0              | -1.439184               | -3.014826 | -1.799183 |
| 9                | 6                | 0              | -1.268205               | -0.415274 | -0.596612 |
| 10               | 7                | 0              | -0.073360               | -0.911654 | -0.828447 |
| 11               | 6                | 0              | -3.538275               | 1.398218  | -1.063765 |
| 12               | 8                | 0              | -4.754707               | 2.006861  | -1.368355 |
| 13               | 15               | 0              | -4.994097               | 3.601138  | -0.789235 |
| 14               | 8                | 0              | -3.872977               | 4.416980  | -1.437715 |
| 15               | 8                | 0              | -6.397216               | 3.899055  | -1.309394 |
| 16               | 8                | 0              | -4.877570               | 3.479748  | 0.732154  |
| 17               | 1                | 0              | -5.502157               | 0.097065  | -2.429585 |
| 18               | 1                | 0              | -4.688435               | -4.156930 | -3.629142 |
| 19               | 1                | 0              | -2.931161               | -4.148415 | -3.903511 |
| 20               | 1                | 0              | -3.567766               | -4.732969 | -2.373666 |
| 21               | 1                | 0              | -1.295629               | 0.583238  | -0.179858 |
| 22               | 1                | 0              | -3.360248               | 1.417721  | 0.018395  |
| 23               | 1                | 0              | -2.701910               | 1.937745  | -1.532112 |
| 24               | 1                | 0              | -5.439859               | -2.080087 | -3.207840 |
| 25               | 6                | 0              | 1.127125                | -0.436123 | -0.158100 |
| 26               | 6                | 0              | 2.343452                | -0.529990 | -1.067386 |
| 27               | 1                | 0              | 0.953975                | 0.597618  | 0.152008  |
| 28               | 1                | 0              | 1.286161                | -1.033137 | 0.745814  |
| 29               | 7                | 0              | -1.823453               | -1.196683 | 1.287670  |
| 30               | 6                | 0              | -3.081829               | -0.841480 | 1.942344  |
| 31               | 1                | 0              | -1.811509               | -2.200062 | 1.096253  |
| 32               | 6                | 0              | -3.001847               | 0.527512  | 2.599583  |
| 33               | 8                | 0              | -3.770170               | 0.914771  | 3.441972  |
| 34               | 8                | 0              | -2.004966               | 1.280194  | 2.122266  |
| 35               | 1                | 0              | -2.039070               | 2.144671  | 2.553321  |
| 36               | 1                | 0              | -3.849067               | -0.736259 | 1.162434  |
| 37               | 6                | 0              | -3.552253               | -1.901032 | 2.938331  |
| 38               | 1                | 0              | -3.694109               | -2.849107 | 2.416110  |
| 39               | 1                | 0              | -2.810405               | -2.042073 | 3.727959  |
| 40               | 1                | 0              | -4.500123               | -1.608157 | 3.390291  |
| 41               | 1                | 0              | -0.067361               | -1.830257 | -1.273733 |
| 42               | 1                | 0              | -1.026263               | -1.014569 | 1.909684  |
| 43               | 8                | 0              | 0.414503                | -1.100487 | 3.217742  |
| 44               | 1                | 0              | 0.727118                | -1.970588 | 2.913255  |
| 45               | 1                | 0              | -0.052694               | -1.250894 | 4.055131  |
| 46               | 8                | 0              | 1.150616                | -3.417255 | 1.883476  |
| 47               | 1                | 0              | 0.352110                | -3.757861 | 1.436027  |
| 48               | 1                | 0              | 1.593881                | -4.182093 | 2.254879  |
| 49               | 8                | 0              | -1.103009               | -1.403177 | 5.580559  |
| 50               | 1                | 0              | -0.661178               | -1.613782 | 6.406571  |
| 51               | 1                | 0              | -1.659477               | -0.645820 | 5.777978  |
| 52               | 8                | 0              | -1.196947               | -4.089344 | 0.622147  |
| 53               | 1                | 0              | -1.283600               | -3.849206 | -0.328098 |
| 54               | 1                | 0              | -1.690794               | -4.900108 | 0.757089  |
| 55               | 6                | 0              | 3.614250                | -0.087986 | -0.347947 |
| 56               | 1                | 0              | 2.456896                | -1.564623 | -1.411023 |
| 57               | 1                | 0              | 2.180538                | 0.087832  | -1.956626 |
| 58               | 6                | 0              | 4.848861                | -0.196710 | -1.238925 |
| 59               | 1                | 0              | 3.492596                | 0.943526  | 0.000334  |
| 60               | 1                | 0              | 3.759827                | -0.703991 | 0.547335  |
| 61               | 6                | 0              | 6.123251                | 0.250602  | -0.536374 |
| 62               | 1                | 0              | 4.984572                | -1.233752 | -1.556612 |
| 63               | 1                | 0              | 4.712066                | 0.389300  | -2.154399 |
| 64               | 6                | 0              | 7.387386                | -0.058595 | -1.362518 |
| 65               | 7                | 0              | 6.064634                | 1.674106  | -0.224275 |
| 66               | 1                | 0              | 6.216042                | -0.275086 | 0.418644  |
| 67               | 8                | 0              | 7.344756                | -0.365930 | -2.548929 |
| 68               | 6                | 0              | 6.666591                | 2.223497  | 0.850715  |
| 69               | 1                | 0              | 5.537817                | 2.269227  | -0.844883 |
| 70               | 8                | 0              | 7.372256                | 1.558911  | 1.611251  |
| 71               | 6                | 0              | 6.432304                | 3.694724  | 1.074461  |
| 72               | 1                | 0              | 5.960690                | 3.824242  | 2.050367  |
| 73               | 1                | 0              | 7.397718                | 4.202786  | 1.099247  |
| 74               | 1                | 0              | 5.803455                | 4.152691  | 0.311119  |

|    |   |   |           |           |           |
|----|---|---|-----------|-----------|-----------|
| 75 | 7 | 0 | 8.532223  | 0.043283  | -0.667234 |
| 76 | 6 | 0 | 9.830609  | -0.125431 | -1.289027 |
| 77 | 1 | 0 | 8.471524  | 0.371563  | 0.289409  |
| 78 | 1 | 0 | 10.596912 | -0.048841 | -0.519483 |
| 79 | 1 | 0 | 9.904407  | -1.105487 | -1.764541 |
| 80 | 1 | 0 | 10.010947 | 0.641193  | -2.047548 |

-----  
Standard basis: 6-311+G(d,p) (6D, 7F)

1151 basis functions  
158 alpha electrons      158 beta electrons  
nuclear repulsion energy      5026.2244026406 Hartrees.  
NAtoms= 80 NActive= 80

Force inversion solution in PCM.

-----  
Polarizable Continuum Model (PCM)

Model : PCM.  
Atomic radii : UFF (Universal Force Field).

Solvent : Water, Eps= 78.355300 Eps(inf)= 1.777849  
-----

SCF Done: E(RWB97XD) = -2380.25149952 A.U. after 2 cycles  
NFock= 2 Conv=0.10D-08 -V/T= 2.0043

Harmonic frequencies (cm\*\*<sup>-1</sup>), IR intensities (KM/Mole), Raman  

|               | 1         | 2      | 3       |
|---------------|-----------|--------|---------|
|               | A         | A      | A       |
| Frequencies-- | -153.0995 | 6.0451 | 13.3164 |

Zero-point correction= 0.659110 (a.u.)  
Thermal correction to Energy= 0.709644  
Thermal correction to Enthalpy= 0.710588  
Thermal correction to Gibbs Free Energy= 0.565498  
Sum of electronic and zero-point Energies= -2379.592389  
Sum of electronic and thermal Energies= -2379.541855  
Sum of electronic and thermal Enthalpies= -2379.540911  
Sum of electronic and thermal Free Energies= -2379.686002

|       | E (Thermal) | CV             | S              |
|-------|-------------|----------------|----------------|
|       | KCal/Mol    | Cal/Mol-Kelvin | Cal/Mol-Kelvin |
| Total | 445.309     | 176.444        | 305.369        |

| Item                 | Value    | Threshold | Converged? |
|----------------------|----------|-----------|------------|
| Maximum Force        | 0.000002 | 0.000450  | YES        |
| RMS Force            | 0.000000 | 0.000300  | YES        |
| Maximum Displacement | 0.002833 | 0.001800  | NO         |
| RMS Displacement     | 0.000579 | 0.001200  | YES        |

Normal termination of Gaussian 16 at Fri Jan 14 06:11:59 2022.

-----Figure S1-3, Int1-----

vita-b6for1.plp.high.log

Stoichiometry C20H41N5O13P(1-)

Standard orientation:

| Center Number | Atomic Number | Atomic Type | Coordinates (Angstroms) |           |           |
|---------------|---------------|-------------|-------------------------|-----------|-----------|
|               |               |             | X                       | Y         | Z         |
| 1             | 6             | 0           | -3.990711               | -0.787574 | -1.260375 |
| 2             | 6             | 0           | -5.033598               | -0.218912 | -2.041578 |
| 3             | 7             | 0           | -5.137367               | 1.109714  | -2.099979 |
| 4             | 6             | 0           | -4.330335               | 1.982532  | -1.466432 |
| 5             | 6             | 0           | -3.306327               | 1.499725  | -0.685771 |
| 6             | 6             | 0           | -3.135219               | 0.113990  | -0.580409 |
| 7             | 6             | 0           | -5.984985               | -1.076314 | -2.798453 |
| 8             | 8             | 0           | -3.870818               | -2.070237 | -1.189637 |
| 9             | 6             | 0           | -1.961366               | -0.416890 | 0.215682  |
| 10            | 7             | 0           | -0.801534               | -0.605856 | -0.629402 |
| 11            | 6             | 0           | -2.388361               | 2.470076  | 0.018276  |
| 12            | 8             | 0           | -2.700284               | 3.778815  | -0.341063 |
| 13            | 15            | 0           | -1.692926               | 5.018382  | 0.281456  |
| 14            | 8             | 0           | -0.296704               | 4.674301  | -0.243338 |
| 15            | 8             | 0           | -2.331413               | 6.258326  | -0.336605 |



Solvent : Water, Eps= 78.355300 Eps(inf)= 1.777849

SCF Done: E(RwB97XD) = -2380.27039183 A.U. after 1 cycles  
NFock= 1 Conv=0.59D-08 -V/T= 2.0043

Zero-point correction= 0.662812 (a.u.)  
Thermal correction to Energy= 0.712405  
Thermal correction to Enthalpy= 0.713349  
Thermal correction to Gibbs Free Energy= 0.570211  
Sum of electronic and zero-point Energies= -2379.607580  
Sum of electronic and thermal Energies= -2379.557987  
Sum of electronic and thermal Enthalpies= -2379.557043  
Sum of electronic and thermal Free Energies= -2379.700180

|       | E (Thermal)<br>KCal/Mol | CV<br>Cal/Mol-Kelvin | S<br>Cal/Mol-Kelvin |
|-------|-------------------------|----------------------|---------------------|
| Total | 447.041                 | 173.978              | 301.259             |

| Item                 | Value    | Threshold | Converged? |
|----------------------|----------|-----------|------------|
| Maximum Force        | 0.000024 | 0.000450  | YES        |
| RMS Force            | 0.000005 | 0.000300  | YES        |
| Maximum Displacement | 0.004393 | 0.001800  | NO         |
| RMS Displacement     | 0.000708 | 0.001200  | YES        |

Normal termination of Gaussian 16 at Wed Jan 12 07:46:02 2022.

-----Figure S1-4, TS2-----

vita-b6ts1.plp.high.log

Stoichiometry C20H41N5O13P(1-)

Standard orientation:

| Center<br>Number | Atomic<br>Number | Atomic<br>Type | Coordinates (Angstroms) |           |           |
|------------------|------------------|----------------|-------------------------|-----------|-----------|
|                  |                  |                | X                       | Y         | Z         |
| 1                | 6                | 0              | -4.029656               | -0.799019 | -1.233978 |
| 2                | 6                | 0              | -5.062481               | -0.216067 | -2.022754 |
| 3                | 7                | 0              | -5.132382               | 1.113266  | -2.119092 |
| 4                | 6                | 0              | -4.295088               | 1.978194  | -1.516008 |
| 5                | 6                | 0              | -3.277529               | 1.483932  | -0.732165 |
| 6                | 6                | 0              | -3.139032               | 0.097393  | -0.584691 |
| 7                | 6                | 0              | -6.046951               | -1.064789 | -2.747639 |
| 8                | 8                | 0              | -3.954101               | -2.077431 | -1.137574 |
| 9                | 6                | 0              | -1.983122               | -0.447371 | 0.241042  |
| 10               | 7                | 0              | -0.831162               | -0.700154 | -0.635199 |
| 11               | 6                | 0              | -2.329773               | 2.454052  | -0.064942 |
| 12               | 8                | 0              | -2.624001               | 3.762063  | -0.447947 |
| 13               | 15               | 0              | -1.610221               | 5.001376  | 0.155704  |
| 14               | 8                | 0              | -0.216237               | 4.647842  | -0.369822 |
| 15               | 8                | 0              | -2.244826               | 6.238554  | -0.473266 |
| 16               | 8                | 0              | -1.742284               | 4.906204  | 1.677812  |
| 17               | 1                | 0              | -4.457283               | 3.030878  | -1.681180 |
| 18               | 1                | 0              | -6.793657               | -0.465720 | -3.269787 |
| 19               | 1                | 0              | -5.530844               | -1.698652 | -3.473073 |
| 20               | 1                | 0              | -6.550850               | -1.729860 | -2.042832 |
| 21               | 1                | 0              | -1.699408               | 0.311938  | 0.979188  |
| 22               | 1                | 0              | -2.412463               | 2.342352  | 1.026467  |
| 23               | 1                | 0              | -1.294951               | 2.196910  | -0.336519 |
| 24               | 1                | 0              | -5.870828               | 1.503453  | -2.693277 |
| 25               | 6                | 0              | 0.454150                | -0.505201 | 0.056379  |
| 26               | 6                | 0              | 1.630218                | -0.703285 | -0.886781 |
| 27               | 1                | 0              | 0.499060                | 0.499396  | 0.501339  |
| 28               | 1                | 0              | 0.504888                | -1.220153 | 0.881596  |
| 29               | 7                | 0              | -2.324437               | -1.655091 | 1.006864  |
| 30               | 6                | 0              | -3.012151               | -1.358457 | 2.262282  |
| 31               | 1                | 0              | -2.969383               | -2.183675 | 0.407504  |
| 32               | 6                | 0              | -2.067035               | -0.811611 | 3.321436  |
| 33               | 8                | 0              | -2.417616               | -0.065491 | 4.201603  |
| 34               | 8                | 0              | -0.821649               | -1.278134 | 3.210671  |
| 35               | 1                | 0              | -0.292245               | -0.913246 | 3.932225  |
| 36               | 1                | 0              | -3.783042               | -0.589433 | 2.129723  |
| 37               | 6                | 0              | -3.676896               | -2.626815 | 2.802615  |
| 38               | 1                | 0              | -4.405436               | -2.993896 | 2.077142  |
| 39               | 1                | 0              | -2.936303               | -3.409656 | 2.982130  |
| 40               | 1                | 0              | -4.198372               | -2.415316 | 3.736709  |
| 41               | 1                | 0              | -0.879943               | -0.060793 | -1.423012 |
| 42               | 1                | 0              | -1.168301               | -2.901125 | 1.123256  |

|    |   |   |           |           |           |
|----|---|---|-----------|-----------|-----------|
| 43 | 8 | 0 | -0.591598 | -3.699425 | 0.885478  |
| 44 | 1 | 0 | -0.598110 | -3.638656 | -0.280665 |
| 45 | 1 | 0 | -1.037686 | -4.512179 | 1.228560  |
| 46 | 8 | 0 | -0.623086 | -3.286293 | -1.469381 |
| 47 | 1 | 0 | -0.754184 | -2.299687 | -1.342411 |
| 48 | 1 | 0 | -1.424417 | -3.615990 | -1.954150 |
| 49 | 8 | 0 | -1.806975 | -5.884730 | 1.808280  |
| 50 | 1 | 0 | -1.721754 | -6.097936 | 2.741079  |
| 51 | 1 | 0 | -2.738569 | -5.989810 | 1.598607  |
| 52 | 8 | 0 | -2.908549 | -3.956203 | -2.634497 |
| 53 | 1 | 0 | -3.418871 | -3.234072 | -2.192561 |
| 54 | 1 | 0 | -3.002440 | -3.820162 | -3.579372 |
| 55 | 6 | 0 | 2.965020  | -0.481055 | -0.181271 |
| 56 | 1 | 0 | 1.598255  | -1.713667 | -1.307471 |
| 57 | 1 | 0 | 1.541936  | -0.004918 | -1.727936 |
| 58 | 6 | 0 | 4.152612  | -0.667657 | -1.121937 |
| 59 | 1 | 0 | 2.983074  | 0.525787  | 0.249890  |
| 60 | 1 | 0 | 3.054835  | -1.181012 | 0.657989  |
| 61 | 6 | 0 | 5.492902  | -0.461248 | -0.430428 |
| 62 | 1 | 0 | 4.139955  | -1.678952 | -1.536987 |
| 63 | 1 | 0 | 4.074190  | 0.014935  | -1.975202 |
| 64 | 6 | 0 | 6.682397  | -0.833921 | -1.337084 |
| 65 | 7 | 0 | 5.627868  | 0.916145  | 0.029682  |
| 66 | 1 | 0 | 5.544067  | -1.094521 | 0.460187  |
| 67 | 8 | 0 | 6.568688  | -0.989832 | -2.548152 |
| 68 | 6 | 0 | 6.327072  | 1.265758  | 1.128954  |
| 69 | 1 | 0 | 5.159437  | 1.636123  | -0.498526 |
| 70 | 8 | 0 | 6.964742  | 0.439965  | 1.784442  |
| 71 | 6 | 0 | 6.289105  | 2.721539  | 1.514349  |
| 72 | 1 | 0 | 5.871933  | 2.801748  | 2.519854  |
| 73 | 1 | 0 | 7.311328  | 3.102311  | 1.544541  |
| 74 | 1 | 0 | 5.696832  | 3.332164  | 0.833057  |
| 75 | 7 | 0 | 7.847438  | -0.966897 | -0.681473 |
| 76 | 6 | 0 | 9.095807  | -1.228203 | -1.370109 |
| 77 | 1 | 0 | 7.856101  | -0.741754 | 0.306392  |
| 78 | 1 | 0 | 9.880746  | -1.362434 | -0.627762 |
| 79 | 1 | 0 | 9.018809  | -2.136422 | -1.971003 |
| 80 | 1 | 0 | 9.368453  | -0.399551 | -2.029521 |

-----  
Standard basis: 6-311+G(d,p) (6D, 7F)

1151 basis functions  
158 alpha electrons      158 beta electrons  
nuclear repulsion energy      5101.1101928482 Hartrees.  
NAtoms= 80 NActive= 80

Force inversion solution in PCM.

-----  
Polarizable Continuum Model (PCM)

Model : PCM.  
Atomic radii : UFF (Universal Force Field).

Solvent : Water, Eps= 78.355300 Eps(inf)= 1.777849  
-----

SCF Done: E(RwB97XD) = -2380.25333338 A.U. after 2 cycles  
NFock= 2 Conv=0.63D-09 -V/T= 2.0043  
DoSCS=F DFT=T ScaleE2(SS,OS)= 1.000000 1.000000  
Range of M.O.s used for correlation: 1 1147

Harmonic frequencies (cm\*\*<sup>-1</sup>), IR intensities (KM/Mole), Raman

|                | 1         | 2      | 3       |
|----------------|-----------|--------|---------|
|                | A         | A      | A       |
| Frequencies -- | -551.7132 | 8.7245 | 10.2489 |

Zero-point correction= 0.658602 (a.u.)  
Thermal correction to Energy= 0.706500  
Thermal correction to Enthalpy= 0.707444  
Thermal correction to Gibbs Free Energy= 0.568183  
Sum of electronic and zero-point Energies= -2379.594732  
Sum of electronic and thermal Energies= -2379.546833  
Sum of electronic and thermal Enthalpies= -2379.545889  
Sum of electronic and thermal Free Energies= -2379.685151

|       | E (Thermal) | CV             | S              |
|-------|-------------|----------------|----------------|
|       | KCal/Mol    | Cal/Mol-Kelvin | Cal/Mol-Kelvin |
| Total | 443.335     | 169.415        | 293.100        |



| Item                 | Value    | Threshold | Converged? |
|----------------------|----------|-----------|------------|
| Maximum Force        | 0.000009 | 0.000450  | YES        |
| RMS Force            | 0.000001 | 0.000300  | YES        |
| Maximum Displacement | 0.001315 | 0.001800  | YES        |
| RMS Displacement     | 0.000244 | 0.001200  | YES        |

Normal termination of Gaussian 16 at Wed Dec 29 16:27:32 2021.

-----Figure S1-5, Int2-----

vita-b6rev1.plp.high.log

Stoichiometry C20H41N5O13P(1-)

Standard orientation:

| Center Number | Atomic Number | Atomic Type | Coordinates (Angstroms) |           |           |
|---------------|---------------|-------------|-------------------------|-----------|-----------|
|               |               |             | X                       | Y         | Z         |
| 1             | 6             | 0           | -3.633745               | -1.409761 | -1.382163 |
| 2             | 6             | 0           | -4.774140               | -1.152343 | -2.199972 |
| 3             | 7             | 0           | -5.227319               | 0.098052  | -2.288093 |
| 4             | 6             | 0           | -4.701533               | 1.166382  | -1.656650 |
| 5             | 6             | 0           | -3.599916               | 0.992802  | -0.848815 |
| 6             | 6             | 0           | -3.062490               | -0.293345 | -0.715716 |
| 7             | 6             | 0           | -5.449137               | -2.247677 | -2.946619 |
| 8             | 8             | 0           | -3.170880               | -2.592984 | -1.262802 |
| 9             | 6             | 0           | -1.846949               | -0.545599 | 0.156349  |
| 10            | 7             | 0           | -0.629138               | -0.747067 | -0.712040 |
| 11            | 6             | 0           | -3.014000               | 2.196106  | -0.145360 |
| 12            | 8             | 0           | -3.715194               | 3.349962  | -0.493076 |
| 13            | 15            | 0           | -3.096295               | 4.836749  | 0.090922  |
| 14            | 8             | 0           | -1.664579               | 4.890533  | -0.447980 |
| 15            | 8             | 0           | -4.065321               | 5.832451  | -0.538697 |
| 16            | 8             | 0           | -3.183600               | 4.719588  | 1.614469  |
| 17            | 1             | 0           | -5.169722               | 2.123299  | -1.818424 |
| 18            | 1             | 0           | -6.320752               | -1.889001 | -3.494808 |
| 19            | 1             | 0           | -4.750329               | -2.704118 | -3.651990 |
| 20            | 1             | 0           | -5.761031               | -3.030544 | -2.251416 |
| 21            | 1             | 0           | -1.627724               | 0.339821  | 0.752411  |
| 22            | 1             | 0           | -3.055526               | 2.033254  | 0.942080  |
| 23            | 1             | 0           | -1.954322               | 2.300055  | -0.418425 |
| 24            | 1             | 0           | -6.036020               | 0.261468  | -2.877346 |
| 25            | 6             | 0           | 0.651371                | -0.389063 | -0.029716 |
| 26            | 6             | 0           | 1.845589                | -0.585222 | -0.947291 |
| 27            | 1             | 0           | 0.567334                | 0.651701  | 0.287691  |
| 28            | 1             | 0           | 0.718654                | -1.013903 | 0.860040  |
| 29            | 7             | 0           | -1.955802               | -1.683078 | 1.047713  |
| 30            | 6             | 0           | -2.709009               | -1.410746 | 2.267857  |
| 31            | 1             | 0           | -2.421368               | -2.422997 | 0.517924  |
| 32            | 6             | 0           | -1.918990               | -0.597857 | 3.284380  |
| 33            | 8             | 0           | -2.440799               | -0.019349 | 4.204401  |
| 34            | 8             | 0           | -0.600916               | -0.608795 | 3.079670  |
| 35            | 1             | 0           | -0.179623               | -0.082828 | 3.772833  |
| 36            | 1             | 0           | -3.616235               | -0.825206 | 2.069039  |
| 37            | 6             | 0           | -3.128141               | -2.734117 | 2.912627  |
| 38            | 1             | 0           | -3.773046               | -3.286374 | 2.226313  |
| 39            | 1             | 0           | -2.255033               | -3.348743 | 3.143989  |
| 40            | 1             | 0           | -3.683459               | -2.547202 | 3.831660  |
| 41            | 1             | 0           | -0.730087               | -0.182825 | -1.556340 |
| 42            | 1             | 0           | -0.421015               | -2.864408 | 1.466340  |
| 43            | 8             | 0           | 0.261165                | -3.554430 | 1.385481  |
| 44            | 1             | 0           | 0.140642                | -3.674126 | -0.426769 |
| 45            | 1             | 0           | -0.030070               | -4.278973 | 1.964644  |
| 46            | 8             | 0           | 0.028027                | -3.336485 | -1.335531 |
| 47            | 1             | 0           | -0.560139               | -1.753077 | -1.025714 |
| 48            | 1             | 0           | -0.654474               | -3.883617 | -1.767639 |
| 49            | 8             | 0           | -0.597167               | -5.627101 | 3.059189  |
| 50            | 1             | 0           | -0.567607               | -5.495289 | 4.009770  |
| 51            | 1             | 0           | -1.450075               | -6.031340 | 2.883034  |
| 52            | 8             | 0           | -2.107744               | -4.611151 | -2.583360 |
| 53            | 1             | 0           | -2.658109               | -3.873987 | -2.237579 |
| 54            | 1             | 0           | -2.143206               | -4.545992 | -3.539388 |
| 55            | 6             | 0           | 3.137863                | -0.191384 | -0.235933 |
| 56            | 1             | 0           | 1.893126                | -1.629516 | -1.267210 |
| 57            | 1             | 0           | 1.722419                | 0.027162  | -1.847596 |
| 58            | 6             | 0           | 4.362965                | -0.377690 | -1.127194 |
| 59            | 1             | 0           | 3.068419                | 0.851464  | 0.091405  |
| 60            | 1             | 0           | 3.254803                | -0.797004 | 0.670094  |
| 61            | 6             | 0           | 5.654013                | 0.044206  | -0.439064 |

|    |   |   |           |           |           |
|----|---|---|-----------|-----------|-----------|
| 62 | 1 | 0 | 4.457480  | -1.428402 | -1.412488 |
| 63 | 1 | 0 | 4.245987  | 0.185015  | -2.059840 |
| 64 | 6 | 0 | 6.905452  | -0.339960 | -1.252686 |
| 65 | 7 | 0 | 5.648374  | 1.478530  | -0.174651 |
| 66 | 1 | 0 | 5.727396  | -0.452223 | 0.533129  |
| 67 | 8 | 0 | 6.850616  | -0.690606 | -2.426445 |
| 68 | 6 | 0 | 6.268527  | 2.040454  | 0.883567  |
| 69 | 1 | 0 | 5.149925  | 2.073007  | -0.818941 |
| 70 | 8 | 0 | 6.946894  | 1.375319  | 1.667938  |
| 71 | 6 | 0 | 6.089658  | 3.526096  | 1.057050  |
| 72 | 1 | 0 | 5.631607  | 3.706771  | 2.031207  |
| 73 | 1 | 0 | 7.073120  | 3.999049  | 1.056710  |
| 74 | 1 | 0 | 5.471335  | 3.979888  | 0.282700  |
| 75 | 7 | 0 | 8.053736  | -0.251024 | -0.561518 |
| 76 | 6 | 0 | 9.344868  | -0.488359 | -1.175943 |
| 77 | 1 | 0 | 8.005404  | 0.111699  | 0.383323  |
| 78 | 1 | 0 | 10.114624 | -0.402323 | -0.410898 |
| 79 | 1 | 0 | 9.386849  | -1.490147 | -1.608127 |
| 80 | 1 | 0 | 9.547788  | 0.238234  | -1.967390 |

-----  
Standard basis: 6-311+G(d,p) (6D, 7F)

1151 basis functions  
158 alpha electrons      158 beta electrons  
nuclear repulsion energy    5050.8290753958 Hartrees.  
NAtoms= 80

Force inversion solution in PCM.

-----  
Polarizable Continuum Model (PCM)

=====  
Model                    : PCM.  
Atomic radii            : UFF (Universal Force Field).

Solvent : Water, Eps= 78.355300 Eps(inf)= 1.777849  
-----

SCF Done: E(RwB97XD) = -2380.26888388 A.U. after 1 cycles  
NFock= 1 Conv=0.57D-08    -V/T= 2.0043

|                                              |                 |
|----------------------------------------------|-----------------|
| Zero-point correction=                       | 0.664519 (a.u.) |
| Thermal correction to Energy=                | 0.713888        |
| Thermal correction to Enthalpy=              | 0.714832        |
| Thermal correction to Gibbs Free Energy=     | 0.572955        |
| Sum of electronic and zero-point Energies=   | -2379.604365    |
| Sum of electronic and thermal Energies=      | -2379.554996    |
| Sum of electronic and thermal Enthalpies=    | -2379.554052    |
| Sum of electronic and thermal Free Energies= | -2379.695929    |

|       | E (Thermal) | CV             | S              |
|-------|-------------|----------------|----------------|
|       | KCal/Mol    | Cal/Mol-Kelvin | Cal/Mol-Kelvin |
| Total | 447.971     | 173.744        | 298.605        |

| Item                 | Value    | Threshold | Converged? |
|----------------------|----------|-----------|------------|
| Maximum Force        | 0.000016 | 0.000450  | YES        |
| RMS Force            | 0.000002 | 0.000300  | YES        |
| Maximum Displacement | 0.004216 | 0.001800  | NO         |
| RMS Displacement     | 0.000464 | 0.001200  | YES        |

Normal termination of Gaussian 16 at Wed Jan 12 09:33:52 2022.

-----Figure S1-6, TS3-----

vita-b6tsb.plp.log

.....  
The optimized geometry of TS3 by wB97x-D/6-311+G(d,p)  
SCRF=(PCM,solvent=water) could not be obtained  
in spite of many attempts. Alternatively, by B3LYP/6-31G(d)  
SCRF=(PCM,solvent=water), it was successfully obtained.  
Then, a single-point calculation of wB97x-D/6-311+G(d,p)  
SCRF=(PCM,solvent=water)//B3LYP/6-31G(d) SCRF=(PCM,solvent=water)  
was carried out. The (ET + ZPE) value of TS3 was obtained  
by the sum of wB97x-D/6-311+G(d,p) electronic energy (ET) and  
B3LYP/6-31G(d) zero-point vibrational energy(ZPE)

.....  
Stoichiometry    C20H41N5O13P(1-)

Standard orientation:  
-----

| Center<br>Number | Atomic<br>Number | Atomic<br>Type | Coordinates (Angstroms) |           |           |
|------------------|------------------|----------------|-------------------------|-----------|-----------|
|                  |                  |                | X                       | Y         | Z         |
| 1                | 6                | 0              | -4.438148               | -0.213492 | -0.601266 |
| 2                | 6                | 0              | -5.321168               | 0.414118  | -1.546126 |
| 3                | 7                | 0              | -5.124241               | 1.704484  | -1.840804 |
| 4                | 6                | 0              | -4.156903               | 2.497686  | -1.314996 |
| 5                | 6                | 0              | -3.286057               | 1.974877  | -0.381770 |
| 6                | 6                | 0              | -3.425636               | 0.613605  | -0.010602 |
| 7                | 6                | 0              | -6.441660               | -0.325668 | -2.198290 |
| 8                | 8                | 0              | -4.591341               | -1.459425 | -0.310685 |
| 9                | 6                | 0              | -2.567128               | 0.074301  | 1.042365  |
| 10               | 7                | 0              | -0.764519               | -0.343112 | -0.325569 |
| 11               | 6                | 0              | -2.230050               | 2.883858  | 0.218852  |
| 12               | 8                | 0              | -2.341760               | 4.179057  | -0.316619 |
| 13               | 15               | 0              | -1.104598               | 5.322453  | 0.087413  |
| 14               | 8                | 0              | 0.190438                | 4.722410  | -0.500809 |
| 15               | 8                | 0              | -1.628216               | 6.577638  | -0.633583 |
| 16               | 8                | 0              | -1.122173               | 5.394330  | 1.629037  |
| 17               | 1                | 0              | -4.121906               | 3.523828  | -1.646029 |
| 18               | 1                | 0              | -7.138475               | 0.356156  | -2.692916 |
| 19               | 1                | 0              | -6.059938               | -1.025533 | -2.951330 |
| 20               | 1                | 0              | -6.984468               | -0.914484 | -1.453321 |
| 21               | 1                | 0              | -1.924840               | 0.761370  | 1.578192  |
| 22               | 1                | 0              | -2.353056               | 2.909382  | 1.312251  |
| 23               | 1                | 0              | -1.232606               | 2.465186  | 0.015297  |
| 24               | 1                | 0              | -5.757892               | 2.131857  | -2.512670 |
| 25               | 6                | 0              | 0.591226                | -0.234802 | 0.241744  |
| 26               | 6                | 0              | 1.720979                | -0.556506 | -0.747081 |
| 27               | 1                | 0              | 0.715332                | 0.783011  | 0.630662  |
| 28               | 1                | 0              | 0.649918                | -0.913458 | 1.099280  |
| 29               | 7                | 0              | -2.862103               | -1.045935 | 1.677828  |
| 30               | 6                | 0              | -2.355089               | -1.383066 | 3.007794  |
| 31               | 1                | 0              | -3.543778               | -1.651022 | 1.202724  |
| 32               | 6                | 0              | -1.050109               | -2.181728 | 3.009381  |
| 33               | 8                | 0              | -0.181215               | -2.022953 | 3.842419  |
| 34               | 8                | 0              | -0.972335               | -3.106689 | 2.033355  |
| 35               | 1                | 0              | -0.118813               | -3.576419 | 2.126956  |
| 36               | 1                | 0              | -2.124805               | -0.449355 | 3.526322  |
| 37               | 6                | 0              | -3.431191               | -2.149993 | 3.795356  |
| 38               | 1                | 0              | -4.330745               | -1.534040 | 3.876246  |
| 39               | 1                | 0              | -3.686374               | -3.091270 | 3.298695  |
| 40               | 1                | 0              | -3.068327               | -2.373028 | 4.801928  |
| 41               | 1                | 0              | -0.861423               | 0.283168  | -1.125397 |
| 42               | 1                | 0              | -1.856205               | -4.699904 | 0.889201  |
| 43               | 8                | 0              | -1.649914               | -5.232174 | 0.102566  |
| 44               | 1                | 0              | -1.281797               | -3.829564 | -1.082571 |
| 45               | 1                | 0              | -2.521579               | -5.559035 | -0.231195 |
| 46               | 8                | 0              | -1.296045               | -3.065811 | -1.704115 |
| 47               | 1                | 0              | -0.949343               | -1.292213 | -0.676973 |
| 48               | 1                | 0              | -2.218562               | -3.071317 | -2.034939 |
| 49               | 8                | 0              | -4.063292               | -5.906942 | -1.074819 |
| 50               | 1                | 0              | -4.818494               | -6.085513 | -0.492490 |
| 51               | 1                | 0              | -4.228471               | -5.017252 | -1.473515 |
| 52               | 8                | 0              | -4.119954               | -3.369570 | -2.149030 |
| 53               | 1                | 0              | -4.409594               | -2.656791 | -1.514742 |
| 54               | 1                | 0              | -4.607602               | -3.229837 | -2.976212 |
| 55               | 6                | 0              | 3.109544                | -0.432071 | -0.104819 |
| 56               | 1                | 0              | 1.581603                | -1.575177 | -1.133825 |
| 57               | 1                | 0              | 1.649127                | 0.121734  | -1.608777 |
| 58               | 6                | 0              | 4.240122                | -0.776859 | -1.083780 |
| 59               | 1                | 0              | 3.242599                | 0.588204  | 0.278273  |
| 60               | 1                | 0              | 3.169884                | -1.100023 | 0.766054  |
| 61               | 6                | 0              | 5.634050                | -0.677481 | -0.458784 |
| 62               | 1                | 0              | 4.110806                | -1.801188 | -1.450280 |
| 63               | 1                | 0              | 4.189527                | -0.128528 | -1.968180 |
| 64               | 6                | 0              | 6.742516                | -1.235986 | -1.387218 |
| 65               | 7                | 0              | 5.941281                | 0.708742  | -0.088618 |
| 66               | 1                | 0              | 5.660666                | -1.256482 | 0.470674  |
| 67               | 8                | 0              | 6.561616                | -1.442313 | -2.597112 |
| 68               | 6                | 0              | 6.746110                | 1.051890  | 0.942012  |
| 69               | 1                | 0              | 5.539625                | 1.443903  | -0.656581 |
| 70               | 8                | 0              | 7.332739                | 0.196203  | 1.632613  |
| 71               | 6                | 0              | 6.900570                | 2.531434  | 1.218191  |
| 72               | 1                | 0              | 6.554477                | 2.737254  | 2.236050  |
| 73               | 1                | 0              | 7.961977                | 2.793213  | 1.170325  |
| 74               | 1                | 0              | 6.344461                | 3.162762  | 0.520870  |
| 75               | 7                | 0              | 7.912074                | -1.471696 | -0.763283 |
| 76               | 6                | 0              | 9.102927                | -1.925718 | -1.467079 |
| 77               | 1                | 0              | 7.982571                | -1.194906 | 0.212845  |

|    |   |   |          |           |           |
|----|---|---|----------|-----------|-----------|
| 78 | 1 | 0 | 9.891750 | -2.100707 | -0.734028 |
| 79 | 1 | 0 | 8.900331 | -2.858571 | -2.001647 |
| 80 | 1 | 0 | 9.448154 | -1.180073 | -2.192348 |

-----

SCF Done: E(RB3LYP) = -2380.25869196 A.U. after 1 cycles

Harmonic frequencies (cm\*\*<sup>-1</sup>), IR intensities (KM/Mole), Raman

|                | 1        | 2      | 3       |
|----------------|----------|--------|---------|
|                | A        | A      | A       |
| Frequencies -- | -45.9492 | 8.2534 | 11.2515 |

Zero-point correction= 0.656092 (a.u.)  
 Thermal correction to Energy= 0.705780  
 Thermal correction to Enthalpy= 0.706724  
 Thermal correction to Gibbs Free Energy= 0.564119  
 Sum of electronic and zero-point Energies= -2379.602600  
 Sum of electronic and thermal Energies= -2379.552912  
 Sum of electronic and thermal Enthalpies= -2379.551968  
 Sum of electronic and thermal Free Energies= -2379.694573

|       | E (Thermal) | CV             | S              |
|-------|-------------|----------------|----------------|
|       | KCal/Mol    | Cal/Mol-Kelvin | Cal/Mol-Kelvin |
| Total | 442.884     | 175.674        | 300.139        |

| Item                 | Value    | Threshold | Converged? |
|----------------------|----------|-----------|------------|
| Maximum Force        | 0.000003 | 0.000450  | YES        |
| RMS Force            | 0.000001 | 0.000300  | YES        |
| Maximum Displacement | 0.001733 | 0.001800  | YES        |
| RMS Displacement     | 0.000270 | 0.001200  | YES        |

Predicted change in Energy=-7.072559D-09  
 Optimization completed.

.....  
 The single-point electronic energy of TS3 by  
 wb97x-D/ 6-311+G(d,p) SCRF=(PCM,solvent=water)  
 = -2380.243213 a.u..  
 Then, the splicing ET + ZPE= -2380.243213 + 0.656092  
 = -2379.587121 a.u.  
 .....

=====  
 =====Figure S2 in Scheme 4b=====

-----Figure S2-1, Int3-----

vita-b6forb.plp.high.log

Stoichiometry C20H41N5O13P(1-)

Standard orientation:

| Center Number | Atomic Number | Atomic Type | Coordinates (Angstroms) |           |           |
|---------------|---------------|-------------|-------------------------|-----------|-----------|
|               |               |             | X                       | Y         | Z         |
| 1             | 6             | 0           | -4.483017               | 0.234368  | -0.714304 |
| 2             | 6             | 0           | -5.065599               | 0.929685  | -1.829133 |
| 3             | 7             | 0           | -4.603337               | 2.133395  | -2.134332 |
| 4             | 6             | 0           | -3.615949               | 2.792922  | -1.480356 |
| 5             | 6             | 0           | -3.027648               | 2.208091  | -0.392794 |
| 6             | 6             | 0           | -3.467648               | 0.925239  | 0.004792  |
| 7             | 6             | 0           | -6.153581               | 0.322199  | -2.639907 |
| 8             | 8             | 0           | -4.888287               | -0.935175 | -0.415912 |
| 9             | 6             | 0           | -2.876573               | 0.308343  | 1.169864  |
| 10            | 7             | 0           | -0.792263               | -0.327680 | -0.172843 |
| 11            | 6             | 0           | -1.928801               | 2.944421  | 0.332607  |
| 12            | 8             | 0           | -1.643046               | 4.141114  | -0.320706 |
| 13            | 15            | 0           | -0.316448               | 5.057173  | 0.261118  |
| 14            | 8             | 0           | 0.892945                | 4.134478  | 0.093160  |
| 15            | 8             | 0           | -0.352202               | 6.256119  | -0.681423 |
| 16            | 8             | 0           | -0.671873               | 5.360592  | 1.718387  |
| 17            | 1             | 0           | -3.336886               | 3.765249  | -1.851347 |
| 18            | 1             | 0           | -6.666788               | 1.068975  | -3.245723 |
| 19            | 1             | 0           | -5.742828               | -0.438905 | -3.308762 |
| 20            | 1             | 0           | -6.871088               | -0.168898 | -1.981861 |
| 21            | 1             | 0           | -2.160085               | 0.863538  | 1.761871  |
| 22            | 1             | 0           | -2.245698               | 3.132021  | 1.369112  |
| 23            | 1             | 0           | -1.039227               | 2.300362  | 0.377782  |
| 24            | 1             | 0           | -5.023744               | 2.606463  | -2.927688 |
| 25            | 6             | 0           | 0.571998                | -0.273124 | 0.349593  |
| 26            | 6             | 0           | 1.652789                | -0.736117 | -0.625038 |

|    |   |   |           |           |           |
|----|---|---|-----------|-----------|-----------|
| 27 | 1 | 0 | 0.777921  | 0.756953  | 0.659747  |
| 28 | 1 | 0 | 0.619228  | -0.878788 | 1.259553  |
| 29 | 7 | 0 | -3.303687 | -0.813363 | 1.662369  |
| 30 | 6 | 0 | -2.837675 | -1.362271 | 2.932823  |
| 31 | 1 | 0 | -4.001715 | -1.305493 | 1.086769  |
| 32 | 6 | 0 | -1.441047 | -1.965118 | 2.814760  |
| 33 | 8 | 0 | -0.542007 | -1.702789 | 3.567608  |
| 34 | 8 | 0 | -1.336133 | -2.835637 | 1.809457  |
| 35 | 1 | 0 | -0.431269 | -3.177119 | 1.784519  |
| 36 | 1 | 0 | -2.748773 | -0.542768 | 3.646383  |
| 37 | 6 | 0 | -3.836376 | -2.395031 | 3.446095  |
| 38 | 1 | 0 | -4.804771 | -1.918698 | 3.602808  |
| 39 | 1 | 0 | -3.953697 | -3.213619 | 2.733317  |
| 40 | 1 | 0 | -3.492297 | -2.804112 | 4.396250  |
| 41 | 1 | 0 | -0.864560 | 0.258667  | -0.999287 |
| 42 | 1 | 0 | -2.269881 | -4.670277 | 1.052870  |
| 43 | 8 | 0 | -2.190729 | -5.175274 | 0.239132  |
| 44 | 1 | 0 | -1.735379 | -3.750302 | -0.922361 |
| 45 | 1 | 0 | -3.109793 | -5.352858 | -0.041103 |
| 46 | 8 | 0 | -1.697645 | -2.984828 | -1.520526 |
| 47 | 1 | 0 | -1.037901 | -1.272304 | -0.476931 |
| 48 | 1 | 0 | -2.608295 | -2.914121 | -1.843705 |
| 49 | 8 | 0 | -4.732032 | -5.429272 | -0.789348 |
| 50 | 1 | 0 | -5.499685 | -5.457005 | -0.215045 |
| 51 | 1 | 0 | -4.776777 | -4.573387 | -1.258397 |
| 52 | 8 | 0 | -4.522451 | -3.005284 | -2.066294 |
| 53 | 1 | 0 | -4.778778 | -2.228008 | -1.521223 |
| 54 | 1 | 0 | -4.935623 | -2.898298 | -2.925497 |
| 55 | 6 | 0 | 3.053105  | -0.647761 | -0.025233 |
| 56 | 1 | 0 | 1.442225  | -1.768274 | -0.929737 |
| 57 | 1 | 0 | 1.601249  | -0.121766 | -1.532330 |
| 58 | 6 | 0 | 4.135949  | -1.097568 | -1.002828 |
| 59 | 1 | 0 | 3.242535  | 0.383231  | 0.294224  |
| 60 | 1 | 0 | 3.103149  | -1.266407 | 0.879144  |
| 61 | 6 | 0 | 5.538432  | -1.009559 | -0.416643 |
| 62 | 1 | 0 | 3.958922  | -2.134998 | -1.298802 |
| 63 | 1 | 0 | 4.087693  | -0.504347 | -1.922757 |
| 64 | 6 | 0 | 6.600928  | -1.638954 | -1.339173 |
| 65 | 7 | 0 | 5.887653  | 0.376615  | -0.126319 |
| 66 | 1 | 0 | 5.568587  | -1.546085 | 0.536413  |
| 67 | 8 | 0 | 6.380263  | -1.913997 | -2.513797 |
| 68 | 6 | 0 | 6.702872  | 0.741553  | 0.884142  |
| 69 | 1 | 0 | 5.476560  | 1.094323  | -0.703013 |
| 70 | 8 | 0 | 7.274054  | -0.089540 | 1.592389  |
| 71 | 6 | 0 | 6.878563  | 2.221441  | 1.104576  |
| 72 | 1 | 0 | 6.511709  | 2.467022  | 2.103090  |
| 73 | 1 | 0 | 7.943433  | 2.456816  | 1.071726  |
| 74 | 1 | 0 | 6.350762  | 2.832098  | 0.372141  |
| 75 | 7 | 0 | 7.785270  | -1.852838 | -0.742200 |
| 76 | 6 | 0 | 8.934669  | -2.356071 | -1.467742 |
| 77 | 1 | 0 | 7.895245  | -1.525530 | 0.210423  |
| 78 | 1 | 0 | 9.757266  | -2.488501 | -0.767021 |
| 79 | 1 | 0 | 8.706194  | -3.318529 | -1.929921 |
| 80 | 1 | 0 | 9.244944  | -1.661007 | -2.252766 |

-----  
Standard basis: 6-311+G(d,p) (6D, 7F)

1151 basis functions  
158 alpha electrons      158 beta electrons  
nuclear repulsion energy      5000.6277874191 Hartrees.  
NAtoms= 80 NActive= 80

Force inversion solution in PCM.

-----  
Polarizable Continuum Model (PCM)

=====  
Model                    : PCM.  
Atomic radii            : UFF (Universal Force Field).

Solvent    : Water, Eps= 78.355300 Eps(inf)= 1.777849  
-----

SCF Done: E(RwB97XD) = -2380.24952346 A.U. after 2 cycles

Zero-point correction=                    0.659573 (a.u.)  
Thermal correction to Energy=            0.710173  
Thermal correction to Enthalpy=         0.711117  
Thermal correction to Gibbs Free Energy= 0.566202  
Sum of electronic and zero-point Energies= -2379.589951

Sum of electronic and thermal Energies= -2379.539351  
 Sum of electronic and thermal Enthalpies= -2379.538406  
 Sum of electronic and thermal Free Energies= -2379.683321

|                      | E (Thermal)<br>KCal/Mol | CV<br>Cal/Mol-Kelvin | S<br>Cal/Mol-Kelvin |
|----------------------|-------------------------|----------------------|---------------------|
| Total                | 445.640                 | 177.743              | 304.999             |
| Maximum Force        | 0.000014                | 0.000450             | YES                 |
| RMS Force            | 0.000003                | 0.000300             | YES                 |
| Maximum Displacement | 0.004526                | 0.001800             | NO                  |
| RMS Displacement     | 0.000899                | 0.001200             | YES                 |

Normal termination of Gaussian 16 at Wed Jan 12 12:49:45 2022.

-----Figure S2-2, TS4-----

vita-b6ts4.high.log

Stoichiometry C11H22N2O11P(1-)

Standard orientation:

| Center<br>Number | Atomic<br>Number | Atomic<br>Type | Coordinates (Angstroms) |           |           |
|------------------|------------------|----------------|-------------------------|-----------|-----------|
|                  |                  |                | X                       | Y         | Z         |
| 1                | 6                | 0              | -0.414940               | 2.064786  | -0.637004 |
| 2                | 6                | 0              | 0.225201                | 3.335063  | -0.558903 |
| 3                | 7                | 0              | 1.536464                | 3.374609  | -0.331279 |
| 4                | 6                | 0              | 2.333361                | 2.295435  | -0.161550 |
| 5                | 6                | 0              | 1.788728                | 1.039993  | -0.222815 |
| 6                | 6                | 0              | 0.403312                | 0.910223  | -0.463936 |
| 7                | 6                | 0              | -0.540359               | 4.599336  | -0.729305 |
| 8                | 8                | 0              | -1.677354               | 2.000660  | -0.861303 |
| 9                | 6                | 0              | -0.185016               | -0.411785 | -0.518256 |
| 10               | 6                | 0              | 2.681720                | -0.161797 | -0.029557 |
| 11               | 8                | 0              | 3.991266                | 0.245528  | 0.223836  |
| 12               | 15               | 0              | 5.147063                | -0.983449 | 0.519150  |
| 13               | 8                | 0              | 5.198428                | -1.784465 | -0.784149 |
| 14               | 8                | 0              | 6.392792                | -0.155406 | 0.820042  |
| 15               | 8                | 0              | 4.580142                | -1.762957 | 1.708213  |
| 16               | 1                | 0              | 3.380962                | 2.473545  | 0.017999  |
| 17               | 1                | 0              | 0.116629                | 5.468889  | -0.753408 |
| 18               | 1                | 0              | -1.117456               | 4.558422  | -1.654896 |
| 19               | 1                | 0              | -1.251831               | 4.720537  | 0.091127  |
| 20               | 1                | 0              | 0.414615                | -1.293776 | -0.351829 |
| 21               | 1                | 0              | 2.298013                | -0.765228 | 0.805485  |
| 22               | 1                | 0              | 2.635587                | -0.789747 | -0.931466 |
| 23               | 1                | 0              | 1.976010                | 4.286726  | -0.281618 |
| 24               | 7                | 0              | -1.452530               | -0.562323 | -0.757837 |
| 25               | 6                | 0              | -2.317860               | -1.672746 | -0.772308 |
| 26               | 1                | 0              | -1.911801               | 0.367795  | -0.888921 |
| 27               | 1                | 0              | -2.736511               | -1.727771 | 0.743648  |
| 28               | 6                | 0              | -1.811975               | -3.017861 | -0.935898 |
| 29               | 8                | 0              | -2.494599               | -3.976705 | -1.257625 |
| 30               | 8                | 0              | -0.502857               | -3.176499 | -0.626395 |
| 31               | 1                | 0              | -0.290951               | -4.111947 | -0.732191 |
| 32               | 6                | 0              | -3.652094               | -1.363021 | -1.420747 |
| 33               | 1                | 0              | -3.580911               | -1.291041 | -2.511697 |
| 34               | 1                | 0              | -4.372149               | -2.145237 | -1.181744 |
| 35               | 1                | 0              | -4.053787               | -0.418196 | -1.043345 |
| 36               | 8                | 0              | -3.113458               | -1.666265 | 1.766723  |
| 37               | 1                | 0              | -3.765839               | -0.784259 | 1.863362  |
| 38               | 1                | 0              | -2.368297               | -1.609670 | 2.374674  |
| 39               | 8                | 0              | -4.593167               | 0.242765  | 1.949105  |
| 40               | 1                | 0              | -4.254048               | 1.079632  | 1.545924  |
| 41               | 1                | 0              | -5.468845               | 0.050596  | 1.550476  |
| 42               | 8                | 0              | -3.710565               | 2.500218  | 0.840620  |
| 43               | 1                | 0              | -3.496773               | 3.215860  | 1.442446  |
| 44               | 1                | 0              | -2.942287               | 2.405667  | 0.237551  |
| 45               | 8                | 0              | -6.992812               | -0.315114 | 0.810565  |
| 46               | 1                | 0              | -6.977395               | -0.953020 | 0.092728  |
| 47               | 1                | 0              | -7.709425               | -0.591876 | 1.386872  |

Standard basis: 6-311+G(d,p) (6D, 7F)

715 basis functions  
 103 alpha electrons      103 beta electrons  
 nuclear repulsion energy      2561.3035828000 Hartrees.

NAtoms= 47 NActive= 47

Force inversion solution in PCM.

-----  
Polarizable Continuum Model (PCM)

=====  
Model : PCM.  
Atomic radii : UFF (Universal Force Field).

Solvent : Water, Eps= 78.355300 Eps(inf)= 1.777849  
-----

SCF Done: E(RwB97XD) = -1711.02987648 A.U. after 1 cycles  
NFock= 1 Conv=0.36D-08 -V/T= 2.0039

Harmonic frequencies (cm\*\*<sup>-1</sup>), IR intensities (KM/Mole), Raman  
1 2 3  
A A A  
Frequencies -- -741.2181 13.0739 26.4608

Zero-point correction= 0.358533 (a.u.)  
Thermal correction to Energy= 0.389766  
Thermal correction to Enthalpy= 0.390710  
Thermal correction to Gibbs Free Energy= 0.292561  
Sum of electronic and zero-point Energies= -1710.671344  
Sum of electronic and thermal Energies= -1710.640111  
Sum of electronic and thermal Enthalpies= -1710.639166  
Sum of electronic and thermal Free Energies= -1710.737316

|       | E (Thermal) | CV             | S              |
|-------|-------------|----------------|----------------|
|       | KCal/Mol    | Cal/Mol-Kelvin | Cal/Mol-Kelvin |
| Total | 244.582     | 109.999        | 206.573        |

| Item                 | Value    | Threshold | Converged? |
|----------------------|----------|-----------|------------|
| Maximum Force        | 0.000027 | 0.000450  | YES        |
| RMS Force            | 0.000004 | 0.000300  | YES        |
| Maximum Displacement | 0.002778 | 0.001800  | NO         |
| RMS Displacement     | 0.000644 | 0.001200  | YES        |

Predicted change in Energy=-2.073107D-08

Normal termination of Gaussian 16 at Tue Jan 11 17:32:30 2022.

-----Figure S2-3, Int4-----

vita-b6ts4.rev.high.log

Stoichiometry C11H22N2O11P(1-)

Standard orientation:

| Center Number | Atomic Number | Atomic Type | Coordinates (Angstroms) |           |           |
|---------------|---------------|-------------|-------------------------|-----------|-----------|
|               |               |             | X                       | Y         | Z         |
| 1             | 6             | 0           | -0.517461               | 1.888467  | -0.635218 |
| 2             | 6             | 0           | 0.016689                | 3.188454  | -0.536186 |
| 3             | 7             | 0           | 1.326155                | 3.332271  | -0.283337 |
| 4             | 6             | 0           | 2.188782                | 2.311546  | -0.109621 |
| 5             | 6             | 0           | 1.738202                | 1.019366  | -0.185325 |
| 6             | 6             | 0           | 0.369801                | 0.782541  | -0.448599 |
| 7             | 6             | 0           | -0.832392               | 4.403773  | -0.691444 |
| 8             | 8             | 0           | -1.777455               | 1.718062  | -0.896717 |
| 9             | 6             | 0           | -0.112755               | -0.573457 | -0.512543 |
| 10            | 6             | 0           | 2.713534                | -0.115002 | 0.013857  |
| 11            | 8             | 0           | 3.996038                | 0.386419  | 0.245725  |
| 12            | 15            | 0           | 5.267179                | -0.741769 | 0.434187  |
| 13            | 8             | 0           | 5.296644                | -1.515821 | -0.886482 |
| 14            | 8             | 0           | 6.457341                | 0.185412  | 0.664290  |
| 15            | 8             | 0           | 4.861564                | -1.588006 | 1.644067  |
| 16            | 1             | 0           | 3.220236                | 2.558567  | 0.084341  |
| 17            | 1             | 0           | -0.230575               | 5.289070  | -0.900704 |
| 18            | 1             | 0           | -1.545353               | 4.256453  | -1.503292 |
| 19            | 1             | 0           | -1.403162               | 4.589185  | 0.223221  |
| 20            | 1             | 0           | 0.539780                | -1.412276 | -0.336355 |
| 21            | 1             | 0           | 2.378732                | -0.732991 | 0.860214  |
| 22            | 1             | 0           | 2.702650                | -0.758800 | -0.877811 |
| 23            | 1             | 0           | 1.693568                | 4.273445  | -0.221296 |
| 24            | 7             | 0           | -1.384625               | -0.805792 | -0.772289 |
| 25            | 6             | 0           | -2.162230               | -1.917051 | -0.847489 |
| 26            | 1             | 0           | -1.879368               | 0.110065  | -0.919326 |
| 27            | 1             | 0           | -2.722010               | -1.629423 | 1.224379  |



|    |   |   |           |           |           |
|----|---|---|-----------|-----------|-----------|
| 28 | 6 | 0 | -1.665987 | -3.252199 | -0.705642 |
| 29 | 8 | 0 | -2.342254 | -4.260950 | -0.869099 |
| 30 | 8 | 0 | -0.360931 | -3.348364 | -0.346022 |
| 31 | 1 | 0 | -0.154918 | -4.287790 | -0.270149 |
| 32 | 6 | 0 | -3.573863 | -1.719939 | -1.330295 |
| 33 | 1 | 0 | -3.673494 | -1.929732 | -2.401131 |
| 34 | 1 | 0 | -4.261504 | -2.384114 | -0.803707 |
| 35 | 1 | 0 | -3.903030 | -0.691637 | -1.161061 |
| 36 | 8 | 0 | -3.085852 | -1.291361 | 2.059156  |
| 37 | 1 | 0 | -4.094758 | -0.096810 | 1.867717  |
| 38 | 1 | 0 | -2.330816 | -1.128754 | 2.631144  |
| 39 | 8 | 0 | -4.773723 | 0.635931  | 1.740879  |
| 40 | 1 | 0 | -4.386301 | 1.422648  | 1.173260  |
| 41 | 1 | 0 | -5.604606 | 0.266277  | 1.317144  |
| 42 | 8 | 0 | -3.896359 | 2.508123  | 0.364486  |
| 43 | 1 | 0 | -3.782006 | 3.342940  | 0.823572  |
| 44 | 1 | 0 | -3.043750 | 2.300993  | -0.112027 |
| 45 | 8 | 0 | -6.947490 | -0.248091 | 0.645557  |
| 46 | 1 | 0 | -6.873459 | -0.904301 | -0.052506 |
| 47 | 1 | 0 | -7.638356 | -0.561639 | 1.235263  |

Standard basis: 6-311+G(d,p) (6D, 7F)

715 basis functions  
 103 alpha electrons 103 beta electrons  
 nuclear repulsion energy 2556.5495731576 Hartrees.  
 NAToms= 47 NActive= 47

Force inversion solution in PCM.

Polarizable Continuum Model (PCM)

Model : PCM.  
 Atomic radii : UFF (Universal Force Field).

Solvent : Water, Eps= 78.355300 Eps(inf)= 1.777849

SCF Done: E(RwB97XD) = -1711.03939183 A.U. after 1 cycles  
 NFock= 1 Conv=0.45D-08 -V/T= 2.0039

Zero-point correction= 0.362499 (a.u.)  
 Thermal correction to Energy= 0.394177  
 Thermal correction to Enthalpy= 0.395121  
 Thermal correction to Gibbs Free Energy= 0.296915  
 Sum of electronic and zero-point Energies= -1710.676893  
 Sum of electronic and thermal Energies= -1710.645215  
 Sum of electronic and thermal Enthalpies= -1710.644270  
 Sum of electronic and thermal Free Energies= -1710.742477

|       | E (Thermal) | CV             | S              |
|-------|-------------|----------------|----------------|
|       | KCal/Mol    | Cal/Mol-Kelvin | Cal/Mol-Kelvin |
| Total | 247.350     | 112.008        | 206.694        |

| Item                 | Value    | Threshold | Converged? |
|----------------------|----------|-----------|------------|
| Maximum Force        | 0.000039 | 0.000450  | YES        |
| RMS Force            | 0.000008 | 0.000300  | YES        |
| Maximum Displacement | 0.006359 | 0.001800  | NO         |
| RMS Displacement     | 0.001174 | 0.001200  | YES        |

Normal termination of Gaussian 16 at Tue Jan 11 16:55:44 2022.

-----Figure S2-4, TS5-----

vita-b6ts4c.plp.high.log

Stoichiometry C20H41N5O13P(1-)

Standard orientation:

| Center Number | Atomic Number | Atomic Type | Coordinates (Angstroms) |           |           |
|---------------|---------------|-------------|-------------------------|-----------|-----------|
|               |               |             | X                       | Y         | Z         |
| 1             | 6             | 0           | 6.150888                | -1.434645 | -0.540834 |
| 2             | 6             | 0           | 7.426276                | -0.881969 | -0.943343 |
| 3             | 7             | 0           | 7.683707                | 0.383673  | -0.663276 |
| 4             | 6             | 0           | 6.856912                | 1.241505  | -0.006880 |
| 5             | 6             | 0           | 5.639927                | 0.797986  | 0.424909  |
| 6             | 6             | 0           | 5.276660                | -0.546130 | 0.167826  |

|    |    |   |            |           |           |
|----|----|---|------------|-----------|-----------|
| 7  | 6  | 0 | 8.419233   | -1.710820 | -1.673104 |
| 8  | 8  | 0 | 5.868341   | -2.626655 | -0.828870 |
| 9  | 6  | 0 | 3.981318   | -1.011422 | 0.562145  |
| 10 | 6  | 0 | 4.743785   | 1.756599  | 1.185606  |
| 11 | 8  | 0 | 5.151541   | 3.086521  | 1.038375  |
| 12 | 15 | 0 | 4.281036   | 4.044782  | -0.073920 |
| 13 | 8  | 0 | 2.941570   | 4.328210  | 0.600354  |
| 14 | 8  | 0 | 5.202252   | 5.241397  | -0.251042 |
| 15 | 8  | 0 | 4.148303   | 3.146962  | -1.320669 |
| 16 | 1  | 0 | 7.201703   | 2.253798  | 0.124651  |
| 17 | 1  | 0 | 9.333851   | -1.157018 | -1.885477 |
| 18 | 1  | 0 | 8.663243   | -2.596248 | -1.081946 |
| 19 | 1  | 0 | 7.985170   | -2.062345 | -2.612108 |
| 20 | 1  | 0 | 3.294322   | -0.349991 | 1.075889  |
| 21 | 1  | 0 | 3.707811   | 1.628549  | 0.856963  |
| 22 | 1  | 0 | 4.785618   | 1.489924  | 2.248633  |
| 23 | 1  | 0 | 8.577988   | 0.754525  | -0.966707 |
| 24 | 7  | 0 | 3.543123   | -2.204662 | 0.322399  |
| 25 | 6  | 0 | 2.199252   | -2.633920 | 0.658695  |
| 26 | 1  | 0 | 4.204731   | -2.814139 | -0.181256 |
| 27 | 1  | 0 | 1.501048   | -1.536330 | 0.511333  |
| 28 | 6  | 0 | 2.018172   | -3.004092 | 2.062378  |
| 29 | 8  | 0 | 1.041175   | -3.600468 | 2.498330  |
| 30 | 8  | 0 | 2.968628   | -2.555853 | 2.894713  |
| 31 | 1  | 0 | 2.696754   | -2.769989 | 3.795740  |
| 32 | 6  | 0 | 1.675766   | -3.631364 | -0.358552 |
| 33 | 1  | 0 | 2.287566   | -4.538552 | -0.412875 |
| 34 | 1  | 0 | 0.657728   | -3.926697 | -0.105738 |
| 35 | 1  | 0 | 1.650951   | -3.169438 | -1.348272 |
| 36 | 8  | 0 | 0.882949   | -0.415380 | 0.249238  |
| 37 | 1  | 0 | -0.442670  | -0.941855 | -0.247321 |
| 38 | 1  | 0 | 1.420603   | 0.091084  | -0.377749 |
| 39 | 7  | 0 | -1.410691  | -1.395248 | -0.473782 |
| 40 | 6  | 0 | -2.508680  | -0.427291 | -0.261473 |
| 41 | 1  | 0 | -1.412498  | -1.731042 | -1.445972 |
| 42 | 1  | 0 | -1.514781  | -2.208464 | 0.153731  |
| 43 | 1  | 0 | -2.430654  | -0.060902 | 0.764216  |
| 44 | 1  | 0 | -2.337203  | 0.417872  | -0.931395 |
| 45 | 6  | 0 | -3.873721  | -1.049001 | -0.512789 |
| 46 | 8  | 0 | 2.706812   | 0.975670  | -1.577157 |
| 47 | 1  | 0 | 3.270000   | 0.370914  | -2.062700 |
| 48 | 1  | 0 | 3.250265   | 1.808331  | -1.459099 |
| 49 | 8  | 0 | -1.517123  | -2.215754 | -3.258183 |
| 50 | 1  | 0 | -2.209689  | -2.824798 | -3.525173 |
| 51 | 1  | 0 | -1.542089  | -1.504911 | -3.903154 |
| 52 | 8  | 0 | -1.492827  | -3.588806 | 1.387492  |
| 53 | 1  | 0 | -0.615979  | -3.636233 | 1.812859  |
| 54 | 1  | 0 | -2.129622  | -3.543019 | 2.103476  |
| 55 | 6  | 0 | -5.000754  | -0.037615 | -0.324757 |
| 56 | 1  | 0 | -3.904631  | -1.452004 | -1.531306 |
| 57 | 1  | 0 | -4.017614  | -1.894331 | 0.169789  |
| 58 | 6  | 0 | -6.376469  | -0.659759 | -0.550515 |
| 59 | 1  | 0 | -4.942226  | 0.386236  | 0.683577  |
| 60 | 1  | 0 | -4.861399  | 0.796880  | -1.021969 |
| 61 | 6  | 0 | -7.509884  | 0.347401  | -0.413469 |
| 62 | 1  | 0 | -6.428080  | -1.087974 | -1.555073 |
| 63 | 1  | 0 | -6.538387  | -1.489926 | 0.145669  |
| 64 | 6  | 0 | -8.873919  | -0.249801 | -0.811933 |
| 65 | 7  | 0 | -7.571321  | 0.873844  | 0.945203  |
| 66 | 1  | 0 | -7.318357  | 1.201213  | -1.070172 |
| 67 | 8  | 0 | -9.057588  | -1.455645 | -0.939108 |
| 68 | 6  | 0 | -7.986779  | 2.123741  | 1.237202  |
| 69 | 1  | 0 | -7.277301  | 0.270034  | 1.697254  |
| 70 | 8  | 0 | -8.413704  | 2.886451  | 0.369001  |
| 71 | 6  | 0 | -7.903017  | 2.540114  | 2.682493  |
| 72 | 1  | 0 | -7.262844  | 3.421550  | 2.750627  |
| 73 | 1  | 0 | -8.900212  | 2.823613  | 3.023312  |
| 74 | 1  | 0 | -7.507579  | 1.760837  | 3.333813  |
| 75 | 7  | 0 | -9.836937  | 0.667234  | -1.001230 |
| 76 | 6  | 0 | -11.206643 | 0.297638  | -1.297881 |
| 77 | 1  | 0 | -9.608477  | 1.634056  | -0.802128 |
| 78 | 1  | 0 | -11.784733 | 1.206222  | -1.457402 |
| 79 | 1  | 0 | -11.252452 | -0.313276 | -2.201626 |
| 80 | 1  | 0 | -11.653130 | -0.267918 | -0.475451 |

-----  
Standard basis: 6-311+G(d,p) (6D, 7F)

1151 basis functions

158 alpha electrons

158 beta electrons

nuclear repulsion energy 4766.4775565358 Hartrees.  
NAtoms= 80 NActive= 80

Force inversion solution in PCM.

-----  
Polarizable Continuum Model (PCM)  
=====

Model : PCM.  
Atomic radii : UFF (Universal Force Field).

Solvent : Water, Eps= 78.355300 Eps(inf)= 1.777849  
-----

SCF Done: E(RwB97XD) = -2380.23042567 A.U. after 2 cycles  
NFock= 2 Conv=0.81D-09 -V/T= 2.0043  
DoSCS=F DFT=T Scale2(SS,OS)= 1.000000 1.000000  
Range of M.O.s used for correlation: 1 1148

Harmonic frequencies (cm\*\*<sup>-1</sup>), IR intensities (KM/Mole), Raman  
1 2 3  
A A A  
Frequencies -- -1154.0598 10.2205 11.1655

Zero-point correction= 0.653172 (a.u.)  
Thermal correction to Energy= 0.703808  
Thermal correction to Enthalpy= 0.704752  
Thermal correction to Gibbs Free Energy= 0.558664  
Sum of electronic and zero-point Energies= -2379.577254  
Sum of electronic and thermal Energies= -2379.526618  
Sum of electronic and thermal Enthalpies= -2379.525673  
Sum of electronic and thermal Free Energies= -2379.671762

|            | E (Thermal)<br>KCal/Mol | CV<br>Cal/Mol-Kelvin | S<br>Cal/Mol-Kelvin |
|------------|-------------------------|----------------------|---------------------|
| Total      | 441.646                 | 176.140              | 307.468             |
| Electronic | 0.000                   | 0.000                | 0.000               |

| Item                 | Value    | Threshold | Converged? |
|----------------------|----------|-----------|------------|
| Maximum Force        | 0.000003 | 0.000450  | YES        |
| RMS Force            | 0.000001 | 0.000300  | YES        |
| Maximum Displacement | 0.003725 | 0.001800  | NO         |
| RMS Displacement     | 0.000268 | 0.001200  | YES        |

Normal termination of Gaussian 16 at Mon Jan 10 04:45:10 2022.

-----Figure S2-5, Int5-----

vita-b6rev4b.plp.high.log

Stoichiometry C20H41N5O13P(1-)

Standard orientation:

-----

| Center<br>Number | Atomic<br>Number | Atomic<br>Type | Coordinates (Angstroms) |           |           |
|------------------|------------------|----------------|-------------------------|-----------|-----------|
|                  |                  |                | X                       | Y         | Z         |
| 1                | 6                | 0              | 4.402119                | 1.015646  | 0.546944  |
| 2                | 6                | 0              | 5.170915                | 2.069075  | 0.006629  |
| 3                | 7                | 0              | 4.545828                | 3.174215  | -0.421498 |
| 4                | 6                | 0              | 3.211332                | 3.366132  | -0.378967 |
| 5                | 6                | 0              | 2.401102                | 2.388483  | 0.136349  |
| 6                | 6                | 0              | 2.984283                | 1.194257  | 0.616472  |
| 7                | 6                | 0              | 6.652955                | 1.971033  | -0.108415 |
| 8                | 8                | 0              | 4.983898                | -0.064443 | 0.958624  |
| 9                | 6                | 0              | 2.136115                | 0.156148  | 1.143004  |
| 10               | 6                | 0              | 0.907310                | 2.599870  | 0.160142  |
| 11               | 8                | 0              | 0.584205                | 3.832846  | -0.409596 |
| 12               | 15               | 0              | -1.074092               | 4.193311  | -0.613091 |
| 13               | 8                | 0              | -1.644957               | 4.201069  | 0.808303  |
| 14               | 8                | 0              | -1.005384               | 5.560480  | -1.288003 |
| 15               | 8                | 0              | -1.609787               | 3.062581  | -1.495079 |
| 16               | 1                | 0              | 2.829789                | 4.297397  | -0.765882 |
| 17               | 1                | 0              | 7.095136                | 2.915738  | -0.426401 |
| 18               | 1                | 0              | 7.082520                | 1.680397  | 0.852015  |
| 19               | 1                | 0              | 6.925261                | 1.199432  | -0.833229 |
| 20               | 1                | 0              | 1.071323                | 0.293070  | 1.238704  |
| 21               | 1                | 0              | 0.421288                | 1.781019  | -0.390678 |
| 22               | 1                | 0              | 0.549917                | 2.544825  | 1.199437  |
| 23               | 1                | 0              | 5.114733                | 3.918143  | -0.806008 |
| 24               | 7                | 0              | 2.663246                | -1.002045 | 1.489751  |

-----

|    |   |   |           |           |           |
|----|---|---|-----------|-----------|-----------|
| 25 | 6 | 0 | 2.169179  | -2.188175 | 1.922666  |
| 26 | 1 | 0 | 3.706876  | -0.957254 | 1.361920  |
| 27 | 1 | 0 | 3.572177  | -0.745156 | -2.085662 |
| 28 | 6 | 0 | 0.798592  | -2.416314 | 2.194904  |
| 29 | 8 | 0 | 0.307913  | -3.521032 | 2.470346  |
| 30 | 8 | 0 | -0.006266 | -1.327815 | 2.141436  |
| 31 | 1 | 0 | -0.898269 | -1.627521 | 2.353326  |
| 32 | 6 | 0 | 3.166345  | -3.301045 | 2.081197  |
| 33 | 1 | 0 | 2.812945  | -4.023354 | 2.817157  |
| 34 | 1 | 0 | 3.342343  | -3.842323 | 1.145402  |
| 35 | 1 | 0 | 4.127200  | -2.911446 | 2.428066  |
| 36 | 8 | 0 | 3.733481  | -1.691218 | -2.071290 |
| 37 | 1 | 0 | 2.325962  | -2.716981 | -1.737489 |
| 38 | 1 | 0 | 4.592969  | -1.805261 | -1.613780 |
| 39 | 7 | 0 | 1.367575  | -3.098062 | -1.623480 |
| 40 | 6 | 0 | 0.427237  | -1.984094 | -1.333040 |
| 41 | 1 | 0 | 1.091518  | -3.564754 | -2.503403 |
| 42 | 1 | 0 | 1.349369  | -3.810514 | -0.870338 |
| 43 | 1 | 0 | 0.835176  | -1.417781 | -0.495298 |
| 44 | 1 | 0 | 0.420744  | -1.329824 | -2.206310 |
| 45 | 6 | 0 | -0.967243 | -2.497266 | -1.021170 |
| 46 | 8 | 0 | 6.055117  | -1.887868 | -0.651955 |
| 47 | 1 | 0 | 6.888682  | -1.644910 | -1.059240 |
| 48 | 1 | 0 | 5.824040  | -1.163103 | -0.028398 |
| 49 | 8 | 0 | 0.337589  | -4.131833 | -4.058696 |
| 50 | 1 | 0 | 0.845145  | -4.072952 | -4.871732 |
| 51 | 1 | 0 | -0.087180 | -4.992697 | -4.081709 |
| 52 | 8 | 0 | 1.047307  | -5.120782 | 0.363537  |
| 53 | 1 | 0 | 0.767060  | -4.706231 | 1.202985  |
| 54 | 1 | 0 | 0.337204  | -5.717523 | 0.116765  |
| 55 | 6 | 0 | -1.958834 | -1.353607 | -0.824598 |
| 56 | 1 | 0 | -1.306407 | -3.141929 | -1.839399 |
| 57 | 1 | 0 | -0.932883 | -3.118789 | -0.119464 |
| 58 | 6 | 0 | -3.344537 | -1.874553 | -0.451658 |
| 59 | 1 | 0 | -1.585556 | -0.674038 | -0.051185 |
| 60 | 1 | 0 | -2.026025 | -0.766442 | -1.747517 |
| 61 | 6 | 0 | -4.382263 | -0.770915 | -0.302293 |
| 62 | 1 | 0 | -3.696145 | -2.562983 | -1.224628 |
| 63 | 1 | 0 | -3.294881 | -2.456784 | 0.475338  |
| 64 | 6 | 0 | -5.808048 | -1.335523 | -0.138861 |
| 65 | 7 | 0 | -4.053775 | 0.099002  | 0.819764  |
| 66 | 1 | 0 | -4.376633 | -0.141993 | -1.197583 |
| 67 | 8 | 0 | -6.029082 | -2.515238 | 0.115924  |
| 68 | 6 | 0 | -4.376243 | 1.410847  | 0.866090  |
| 69 | 1 | 0 | -3.569857 | -0.307349 | 1.604866  |
| 70 | 8 | 0 | -5.049629 | 1.939761  | -0.021821 |
| 71 | 6 | 0 | -3.847696 | 2.190991  | 2.034376  |
| 72 | 1 | 0 | -3.071366 | 2.872168  | 1.656105  |
| 73 | 1 | 0 | -4.657090 | 2.790535  | 2.453969  |
| 74 | 1 | 0 | -3.425618 | 1.554234  | 2.813283  |
| 75 | 7 | 0 | -6.778501 | -0.420822 | -0.296894 |
| 76 | 6 | 0 | -8.177942 | -0.738241 | -0.094714 |
| 77 | 1 | 0 | -6.492585 | 0.543782  | -0.424822 |
| 78 | 1 | 0 | -8.772162 | 0.141641  | -0.335591 |
| 79 | 1 | 0 | -8.483563 | -1.559358 | -0.746180 |
| 80 | 1 | 0 | -8.375716 | -1.027366 | 0.941272  |

-----  
Standard basis: 6-311+G(d,p) (6D, 7F)

1151 basis functions  
158 alpha electrons      158 beta electrons  
nuclear repulsion energy      5250.8476205590 Hartrees.  
NAtoms= 80 NActive= 80

Force inversion solution in PCM.

-----  
Polarizable Continuum Model (PCM)

=====  
Model : PCM.  
Atomic radii : UFF (Universal Force Field).

Solvent : Water, Eps= 78.355300 Eps(inf)= 1.777849  
-----

SCF Done: E(RwB97XD) = -2380.25564482 A.U. after 2 cycles  
NFock= 2 Conv=0.47D-09 -V/T= 2.0043

Zero-point correction= 0.659469 (a.u.)

Thermal correction to Energy= 0.710227  
 Thermal correction to Enthalpy= 0.711171  
 Thermal correction to Gibbs Free Energy= 0.569522  
 Sum of electronic and zero-point Energies= -2379.596176  
 Sum of electronic and thermal Energies= -2379.545418  
 Sum of electronic and thermal Enthalpies= -2379.544474  
 Sum of electronic and thermal Free Energies= -2379.686123

|       | E (Thermal)<br>KCal/Mol | CV<br>Cal/Mol-Kelvin | S<br>Cal/Mol-Kelvin |
|-------|-------------------------|----------------------|---------------------|
| Total | 445.674                 | 178.605              | 298.126             |

| Item                 | Value    | Threshold | Converged? |
|----------------------|----------|-----------|------------|
| Maximum Force        | 0.000026 | 0.000450  | YES        |
| RMS Force            | 0.000003 | 0.000300  | YES        |
| Maximum Displacement | 0.005157 | 0.001800  | NO         |
| RMS Displacement     | 0.000772 | 0.001200  | YES        |

Normal termination of Gaussian 16 at Sat Jan 15 02:04:17 2022.

-----Figure S2-6, TS6-----

vita-b6ts5h.high.log

Stoichiometry C11H22N2O11P(1-)

Standard orientation:

| Center<br>Number | Atomic<br>Number | Atomic<br>Type | Coordinates (Angstroms) |           |           |
|------------------|------------------|----------------|-------------------------|-----------|-----------|
|                  |                  |                | X                       | Y         | Z         |
| 1                | 6                | 0              | -2.905372               | -1.015889 | 0.047844  |
| 2                | 6                | 0              | -4.210144               | -0.400519 | -0.069250 |
| 3                | 7                | 0              | -4.295714               | 0.839168  | -0.520095 |
| 4                | 6                | 0              | -3.244442               | 1.613999  | -0.901900 |
| 5                | 6                | 0              | -1.979545               | 1.106069  | -0.828687 |
| 6                | 6                | 0              | -1.787835               | -0.212264 | -0.348808 |
| 7                | 6                | 0              | -5.434894               | -1.147304 | 0.311095  |
| 8                | 8                | 0              | -2.817653               | -2.196075 | 0.478051  |
| 9                | 6                | 0              | -0.458943               | -0.759332 | -0.263039 |
| 10               | 6                | 0              | -0.832132               | 1.974482  | -1.276466 |
| 11               | 8                | 0              | -0.019997               | 2.302280  | -0.151313 |
| 12               | 15               | 0              | 1.620829                | 2.494137  | -0.427662 |
| 13               | 8                | 0              | 2.085619                | 2.837492  | 1.058025  |
| 14               | 8                | 0              | 2.110647                | 1.137085  | -0.882853 |
| 15               | 8                | 0              | 1.833170                | 3.682237  | -1.311016 |
| 16               | 1                | 0              | -3.484169               | 2.606657  | -1.250467 |
| 17               | 1                | 0              | -6.337556               | -0.558189 | 0.150988  |
| 18               | 1                | 0              | -5.495264               | -2.069036 | -0.271882 |
| 19               | 1                | 0              | -5.373979               | -1.437679 | 1.362485  |
| 20               | 1                | 0              | 0.413777                | -0.157791 | -0.515826 |
| 21               | 1                | 0              | -0.239126               | 1.446037  | -2.029716 |
| 22               | 1                | 0              | -1.214813               | 2.891579  | -1.729212 |
| 23               | 1                | 0              | -5.220783               | 1.249521  | -0.589855 |
| 24               | 7                | 0              | -0.246662               | -1.983506 | 0.098375  |
| 25               | 6                | 0              | 1.051594                | -2.608036 | 0.200582  |
| 26               | 1                | 0              | -1.103233               | -2.501784 | 0.355373  |
| 27               | 6                | 0              | 1.821262                | -2.630970 | -1.060037 |
| 28               | 8                | 0              | 2.930940                | -3.127127 | -1.150891 |
| 29               | 8                | 0              | 1.254517                | -2.003016 | -2.100354 |
| 30               | 1                | 0              | 1.887539                | -2.005631 | -2.829159 |
| 31               | 6                | 0              | 0.947700                | -3.968554 | 0.875054  |
| 32               | 1                | 0              | 1.941307                | -4.409230 | 0.950290  |
| 33               | 1                | 0              | 0.555519                | -3.853261 | 1.887990  |
| 34               | 1                | 0              | 0.302151                | -4.662299 | 0.325386  |
| 35               | 1                | 0              | 1.764204                | -1.905619 | 1.003678  |
| 36               | 8                | 0              | 2.507786                | -1.257984 | 1.919852  |
| 37               | 1                | 0              | 1.936180                | 0.074797  | 2.480811  |
| 38               | 1                | 0              | 3.259583                | -0.985457 | 1.380299  |
| 39               | 8                | 0              | 1.643239                | 0.985744  | 2.825928  |
| 40               | 1                | 0              | 1.966448                | 2.093124  | 1.724460  |
| 41               | 1                | 0              | 0.674462                | 1.004072  | 2.841628  |
| 42               | 8                | 0              | 4.289387                | -0.428152 | -0.437369 |
| 43               | 1                | 0              | 4.069054                | -1.295008 | -0.792547 |
| 44               | 1                | 0              | 3.507042                | 0.136045  | -0.615866 |
| 45               | 8                | 0              | -1.069301               | 1.666117  | 2.380270  |
| 46               | 1                | 0              | -1.339920               | 2.445509  | 2.869764  |
| 47               | 1                | 0              | -0.774544               | 1.993057  | 1.513383  |

Standard basis: 6-311+G(d,p) (6D, 7F)

715 basis functions  
103 alpha electrons 103 beta electrons  
nuclear repulsion energy 2813.2215890403 Hartrees.  
NAtoms= 47 NActive= 47

Force inversion solution in PCM.

-----  
Polarizable Continuum Model (PCM)  
=====

Model : PCM.

Solvent : Water, Eps= 78.355300 Eps(inf)= 1.777849  
-----

SCF Done: E(RwB97XD) = -1711.07475349 A.U. after 1 cycles  
NFock= 1 Conv=0.22D-08 -V/T= 2.0039

Harmonic frequencies (cm\*\*<sup>-1</sup>), IR intensities (KM/Mole), Raman  
1 2 3  
A A A  
Frequencies -- -1006.6264 31.1109 42.4377

Zero-point correction= 0.360938 (a.u.)  
Thermal correction to Energy= 0.390763  
Thermal correction to Enthalpy= 0.391707  
Thermal correction to Gibbs Free Energy= 0.301093  
Sum of electronic and zero-point Energies= -1710.713815  
Sum of electronic and thermal Energies= -1710.683991  
Sum of electronic and thermal Enthalpies= -1710.683047  
Sum of electronic and thermal Free Energies= -1710.773661

|       | E (Thermal) | CV             | S              |
|-------|-------------|----------------|----------------|
|       | KCal/Mol    | Cal/Mol-Kelvin | Cal/Mol-Kelvin |
| Total | 245.207     | 108.946        | 190.713        |

| Item                 | Value    | Threshold | Converged? |
|----------------------|----------|-----------|------------|
| Maximum Force        | 0.000014 | 0.000450  | YES        |
| RMS Force            | 0.000002 | 0.000300  | YES        |
| Maximum Displacement | 0.000513 | 0.001800  | YES        |
| RMS Displacement     | 0.000127 | 0.001200  | YES        |

Predicted change in Energy=-1.018149D-08

Normal termination of Gaussian 16 at Wed Dec 29 02:06:17 2021.

-----Figure S2-7, Int6-----

vita-b6rev5h.high.log

Stoichiometry C11H22N2O11P(1-)

Standard orientation:

| Center<br>Number | Atomic<br>Number | Atomic<br>Type | Coordinates (Angstroms) |           |           |
|------------------|------------------|----------------|-------------------------|-----------|-----------|
|                  |                  |                | X                       | Y         | Z         |
| 1                | 6                | 0              | -3.263830               | -0.762140 | -0.049605 |
| 2                | 6                | 0              | -4.422573               | 0.028438  | 0.119079  |
| 3                | 7                | 0              | -4.352621               | 1.359507  | -0.068848 |
| 4                | 6                | 0              | -3.229668               | 2.019261  | -0.412708 |
| 5                | 6                | 0              | -2.065859               | 1.321588  | -0.611857 |
| 6                | 6                | 0              | -2.057749               | -0.084115 | -0.450630 |
| 7                | 6                | 0              | -5.722064               | -0.581120 | 0.517477  |
| 8                | 8                | 0              | -3.305342               | -2.029342 | 0.149150  |
| 9                | 6                | 0              | -0.842147               | -0.807498 | -0.649253 |
| 10               | 6                | 0              | -0.824357               | 2.081971  | -0.987473 |
| 11               | 8                | 0              | 0.108717                | 2.033957  | 0.099149  |
| 12               | 15               | 0              | 1.609127                | 2.710280  | -0.155593 |
| 13               | 8                | 0              | 2.211323                | 2.565133  | 1.321034  |
| 14               | 8                | 0              | 2.341495                | 1.826468  | -1.138634 |
| 15               | 8                | 0              | 1.436676                | 4.160731  | -0.476563 |
| 16               | 1                | 0              | -3.311607               | 3.091345  | -0.515853 |
| 17               | 1                | 0              | -6.524053               | 0.157910  | 0.545095  |
| 18               | 1                | 0              | -5.994031               | -1.373679 | -0.183215 |
| 19               | 1                | 0              | -5.634817               | -1.041994 | 1.504803  |
| 20               | 1                | 0              | 0.067055                | -0.306401 | -0.931899 |
| 21               | 1                | 0              | -0.363629               | 1.650760  | -1.883094 |
| 22               | 1                | 0              | -1.074110               | 3.123821  | -1.202250 |
| 23               | 1                | 0              | -5.197321               | 1.900631  | 0.063879  |

|    |   |   |           |           |           |
|----|---|---|-----------|-----------|-----------|
| 24 | 7 | 0 | -0.798817 | -2.108135 | -0.388132 |
| 25 | 6 | 0 | 0.189568  | -3.022828 | -0.360588 |
| 26 | 1 | 0 | -1.761716 | -2.431143 | -0.103784 |
| 27 | 6 | 0 | 1.546721  | -2.706732 | -0.680987 |
| 28 | 8 | 0 | 2.502884  | -3.450081 | -0.427020 |
| 29 | 8 | 0 | 1.721970  | -1.527065 | -1.287369 |
| 30 | 1 | 0 | 2.670205  | -1.281880 | -1.366612 |
| 31 | 6 | 0 | -0.144850 | -4.390095 | 0.158559  |
| 32 | 1 | 0 | 0.206417  | -4.534413 | 1.186496  |
| 33 | 1 | 0 | -1.225039 | -4.552220 | 0.149931  |
| 34 | 1 | 0 | 0.316444  | -5.167709 | -0.454248 |
| 35 | 1 | 0 | 3.738699  | -2.449037 | 0.631286  |
| 36 | 8 | 0 | 4.222321  | -1.699992 | 1.016875  |
| 37 | 1 | 0 | 3.106585  | -0.580715 | 1.893881  |
| 38 | 1 | 0 | 4.387909  | -1.124097 | 0.251019  |
| 39 | 8 | 0 | 2.623788  | 0.145979  | 2.333394  |
| 40 | 1 | 0 | 2.447352  | 1.645642  | 1.604494  |
| 41 | 1 | 0 | 1.681841  | -0.091863 | 2.377189  |
| 42 | 8 | 0 | 4.025838  | -0.156683 | -1.274583 |
| 43 | 1 | 0 | 4.632227  | -0.012538 | -2.003167 |
| 44 | 1 | 0 | 3.448224  | 0.651539  | -1.201642 |
| 45 | 8 | 0 | -0.145795 | 0.265436  | 2.310320  |
| 46 | 1 | 0 | -0.455800 | 0.779557  | 3.058749  |
| 47 | 1 | 0 | -0.167824 | 0.875983  | 1.553581  |

Standard basis: 6-311+G(d,p) (6D, 7F)

715 basis functions  
 103 alpha electrons 103 beta electrons  
 nuclear repulsion energy 2770.0600367239 Hartrees.  
 NAToms= 47 NActive= 47

Force inversion solution in PCM.

Polarizable Continuum Model (PCM)

Model : PCM.  
 Atomic radii : UFF (Universal Force Field).

Solvent: Water, Eps= 78.355300 Eps(inf)= 1.777849

SCF Done: E(RwB97XD) = -1711.10773553 A.U. after 1 cycles  
 NFock= 1 Conv=0.23D-08 -V/T= 2.0039

|                                              |                 |
|----------------------------------------------|-----------------|
| Zero-point correction=                       | 0.365737 (a.u.) |
| Thermal correction to Energy=                | 0.396265        |
| Thermal correction to Enthalpy=              | 0.397209        |
| Thermal correction to Gibbs Free Energy=     | 0.304588        |
| Sum of electronic and zero-point Energies=   | -1710.741998    |
| Sum of electronic and thermal Energies=      | -1710.711470    |
| Sum of electronic and thermal Enthalpies=    | -1710.710526    |
| Sum of electronic and thermal Free Energies= | -1710.803148    |

|       | E (Thermal)<br>KCal/Mol | CV<br>Cal/Mol-Kelvin | S<br>Cal/Mol-Kelvin |
|-------|-------------------------|----------------------|---------------------|
| Total | 248.660                 | 111.001              | 194.938             |

| Item                 | Value    | Threshold | Converged? |
|----------------------|----------|-----------|------------|
| Maximum Force        | 0.000030 | 0.000450  | YES        |
| RMS Force            | 0.000005 | 0.000300  | YES        |
| Maximum Displacement | 0.002715 | 0.001800  | NO         |
| RMS Displacement     | 0.000496 | 0.001200  | YES        |

Normal termination of Gaussian 16 at Tue Jan 11 19:35:21 2022.

-----Figure S2-8, TS7-----

vita-b6h26miga.high.log

Stoichiometry C11H22N2O11P(1-)

Standard orientation:

| Center<br>Number | Atomic<br>Number | Atomic<br>Type | Coordinates (Angstroms) |           |           |
|------------------|------------------|----------------|-------------------------|-----------|-----------|
|                  |                  |                | X                       | Y         | Z         |
| 1                | 6                | 0              | 3.211485                | 0.674295  | -0.057938 |
| 2                | 6                | 0              | 4.360970                | -0.080008 | 0.137722  |

|    |    |   |           |           |           |
|----|----|---|-----------|-----------|-----------|
| 3  | 7  | 0 | 4.303932  | -1.424716 | -0.042144 |
| 4  | 6  | 0 | 3.183731  | -2.082354 | -0.395548 |
| 5  | 6  | 0 | 2.019087  | -1.397622 | -0.617012 |
| 6  | 6  | 0 | 2.001397  | 0.014901  | -0.469157 |
| 7  | 6  | 0 | 5.652757  | 0.538297  | 0.555285  |
| 8  | 8  | 0 | 3.222761  | 1.974054  | 0.127427  |
| 9  | 6  | 0 | 0.820345  | 0.765136  | -0.682586 |
| 10 | 6  | 0 | 0.780838  | -2.155376 | -0.997518 |
| 11 | 8  | 0 | -0.157553 | -2.101841 | 0.086338  |
| 12 | 15 | 0 | -1.693487 | -2.669945 | -0.203263 |
| 13 | 8  | 0 | -2.293605 | -2.562149 | 1.278157  |
| 14 | 8  | 0 | -2.366914 | -1.693537 | -1.140559 |
| 15 | 8  | 0 | -1.611725 | -4.110538 | -0.597776 |
| 16 | 1  | 0 | 3.266841  | -3.155924 | -0.490327 |
| 17 | 1  | 0 | 6.465828  | -0.189028 | 0.550537  |
| 18 | 1  | 0 | 5.911710  | 1.359260  | -0.116332 |
| 19 | 1  | 0 | 5.566732  | 0.956876  | 1.561491  |
| 20 | 1  | 0 | -0.105722 | 0.292734  | -0.966966 |
| 21 | 1  | 0 | 0.325155  | -1.720402 | -1.894026 |
| 22 | 1  | 0 | 1.025128  | -3.199041 | -1.210054 |
| 23 | 1  | 0 | 5.147995  | -1.960650 | 0.104881  |
| 24 | 7  | 0 | 0.869398  | 2.076376  | -0.413054 |
| 25 | 6  | 0 | -0.056870 | 3.021099  | -0.379831 |
| 26 | 1  | 0 | 2.032458  | 2.273363  | -0.101658 |
| 27 | 6  | 0 | -1.454522 | 2.778581  | -0.677383 |
| 28 | 8  | 0 | -2.360773 | 3.542477  | -0.341466 |
| 29 | 8  | 0 | -1.692791 | 1.651304  | -1.344830 |
| 30 | 1  | 0 | -2.650031 | 1.427179  | -1.384096 |
| 31 | 6  | 0 | 0.332037  | 4.384009  | 0.116719  |
| 32 | 1  | 0 | -0.077146 | 4.580403  | 1.113534  |
| 33 | 1  | 0 | 1.418357  | 4.469886  | 0.174311  |
| 34 | 1  | 0 | -0.039090 | 5.171168  | -0.544728 |
| 35 | 1  | 0 | -3.603538 | 2.537970  | 0.764407  |
| 36 | 8  | 0 | -4.090660 | 1.782601  | 1.128109  |
| 37 | 1  | 0 | -3.011455 | 0.598140  | 1.968291  |
| 38 | 1  | 0 | -4.283132 | 1.241683  | 0.342573  |
| 39 | 8  | 0 | -2.563013 | -0.162160 | 2.386188  |
| 40 | 1  | 0 | -2.473563 | -1.643968 | 1.603420  |
| 41 | 1  | 0 | -1.609939 | 0.027372  | 2.428161  |
| 42 | 8  | 0 | -4.006883 | 0.325214  | -1.220553 |
| 43 | 1  | 0 | -4.660241 | 0.188759  | -1.908920 |
| 44 | 1  | 0 | -3.446824 | -0.497732 | -1.169283 |
| 45 | 8  | 0 | 0.199221  | -0.405631 | 2.339560  |
| 46 | 1  | 0 | 0.471859  | -0.979945 | 3.058291  |
| 47 | 1  | 0 | 0.185553  | -0.974661 | 1.550546  |

-----  
Standard basis: 6-311+G(d,p) (6D, 7F)

715 basis functions  
103 alpha electrons      103 beta electrons  
nuclear repulsion energy      2772.8251991583 Hartrees.  
NAtoms= 47 NActive= 47

Force inversion solution in PCM.

-----  
Polarizable Continuum Model (PCM)

Model : PCM.  
Atomic radii : UFF (Universal Force Field).

Solvent : Water, Eps= 78.355300 Eps(inf)= 1.777849  
-----

SCF Done: E(RwB97XD) = -1711.10507713 A.U. after 1 cycles

Harmonic frequencies (cm\*\*<sup>-1</sup>), IR intensities (KM/Mole), Raman

|                | 1          | 2       | 3       |
|----------------|------------|---------|---------|
|                | A          | A       | A       |
| Frequencies -- | -1076.4290 | 27.5005 | 40.9218 |

Zero-point correction= 0.360875 (a.u.)  
Thermal correction to Energy= 0.391282  
Thermal correction to Enthalpy= 0.392226  
Thermal correction to Gibbs Free Energy= 0.299673  
Sum of electronic and zero-point Energies= -1710.744202  
Sum of electronic and thermal Energies= -1710.713795  
Sum of electronic and thermal Enthalpies= -1710.712851  
Sum of electronic and thermal Free Energies= -1710.805404



|       |             |                |                |
|-------|-------------|----------------|----------------|
|       | E (Thermal) | CV             | S              |
|       | KCal/Mol    | Cal/Mol-Kelvin | Cal/Mol-Kelvin |
| Total | 245.533     | 110.465        | 194.795        |

|                      |      |          |           |            |
|----------------------|------|----------|-----------|------------|
|                      | Item | Value    | Threshold | Converged? |
| Maximum Force        |      | 0.000025 | 0.000450  | YES        |
| RMS Force            |      | 0.000005 | 0.000300  | YES        |
| Maximum Displacement |      | 0.014528 | 0.001800  | NO         |
| RMS Displacement     |      | 0.001712 | 0.001200  | NO         |

Normal termination of Gaussian 16 at Wed Jan 12 18:29:19 2022.

===== Figure S3 in Scheme 4c =====

-----Figure S3-1, Int7-----

vita-b6h26miga.for.high.log

Stoichiometry C11H22N2O11P(1-)

Standard orientation:

| Center Number | Atomic Number | Atomic Type | Coordinates (Angstroms) |           |           |
|---------------|---------------|-------------|-------------------------|-----------|-----------|
|               |               |             | X                       | Y         | Z         |
| 1             | 6             | 0           | 3.321209                | 0.592204  | -0.034313 |
| 2             | 6             | 0           | 4.399985                | -0.224756 | 0.168273  |
| 3             | 7             | 0           | 4.252751                | -1.570939 | -0.019147 |
| 4             | 6             | 0           | 3.079448                | -2.124797 | -0.389066 |
| 5             | 6             | 0           | 1.971963                | -1.360686 | -0.602727 |
| 6             | 6             | 0           | 2.037958                | 0.067217  | -0.430521 |
| 7             | 6             | 0           | 5.743120                | 0.293717  | 0.568816  |
| 8             | 8             | 0           | 3.493469                | 1.918944  | 0.145214  |
| 9             | 6             | 0           | 0.910301                | 0.864355  | -0.623840 |
| 10            | 6             | 0           | 0.702164                | -2.036513 | -1.024582 |
| 11            | 8             | 0           | -0.248071               | -2.006213 | 0.052899  |
| 12            | 15            | 0           | -1.750499               | -2.652263 | -0.238845 |
| 13            | 8             | 0           | -2.357786               | -2.584065 | 1.241931  |
| 14            | 8             | 0           | -2.479225               | -1.715494 | -1.175951 |
| 15            | 8             | 0           | -1.595278               | -4.085432 | -0.639119 |
| 16            | 1             | 0           | 3.076989                | -3.200333 | -0.503799 |
| 17            | 1             | 0           | 6.387367                | -0.511062 | 0.926330  |
| 18            | 1             | 0           | 6.236792                | 0.778700  | -0.277819 |
| 19            | 1             | 0           | 5.640648                | 1.037568  | 1.359836  |
| 20            | 1             | 0           | -0.027361               | 0.396481  | -0.884605 |
| 21            | 1             | 0           | 0.270384                | -1.535758 | -1.898395 |
| 22            | 1             | 0           | 0.902256                | -3.077318 | -1.291042 |
| 23            | 1             | 0           | 5.050850                | -2.169178 | 0.130350  |
| 24            | 7             | 0           | 0.977169                | 2.197998  | -0.381389 |
| 25            | 6             | 0           | 0.021648                | 3.080072  | -0.369858 |
| 26            | 1             | 0           | 2.596650                | 2.329651  | 0.000544  |
| 27            | 6             | 0           | -1.403439               | 2.790040  | -0.631761 |
| 28            | 8             | 0           | -2.308770               | 3.487926  | -0.189058 |
| 29            | 8             | 0           | -1.628046               | 1.721066  | -1.380278 |
| 30            | 1             | 0           | -2.582735               | 1.467640  | -1.408271 |
| 31            | 6             | 0           | 0.336869                | 4.489111  | 0.051385  |
| 32            | 1             | 0           | -0.110251               | 4.722093  | 1.023163  |
| 33            | 1             | 0           | 1.417249                | 4.615164  | 0.127969  |
| 34            | 1             | 0           | -0.052326               | 5.220198  | -0.663260 |
| 35            | 1             | 0           | -3.628973               | 2.490669  | 0.813598  |
| 36            | 8             | 0           | -4.162432               | 1.740081  | 1.115577  |
| 37            | 1             | 0           | -3.144573               | 0.535101  | 1.983184  |
| 38            | 1             | 0           | -4.310105               | 1.235712  | 0.296446  |
| 39            | 8             | 0           | -2.698402               | -0.223320 | 2.408072  |
| 40            | 1             | 0           | -2.565643               | -1.678455 | 1.585673  |
| 41            | 1             | 0           | -1.748209               | -0.022440 | 2.466693  |
| 42            | 8             | 0           | -3.946787               | 0.416682  | -1.297418 |
| 43            | 1             | 0           | -4.574844               | 0.330316  | -2.017007 |
| 44            | 1             | 0           | -3.442279               | -0.442551 | -1.232534 |
| 45            | 8             | 0           | 0.069467                | -0.393635 | 2.363997  |
| 46            | 1             | 0           | 0.351123                | -1.003877 | 3.048829  |
| 47            | 1             | 0           | 0.072569                | -0.915880 | 1.542783  |

Standard basis: 6-311+G(d,p) (6D, 7F)

715 basis functions  
 103 alpha electrons 103 beta electrons  
 nuclear repulsion energy 2756.2783999044 Hartrees.  
 NAtoms= 47 NActive= 47

Force inversion solution in PCM.

-----  
Polarizable Continuum Model (PCM)  
=====

Model : PCM.  
Atomic radii : UFF (Universal Force Field).

Solvent : Water, Eps= 78.355300 Eps(inf)= 1.777849  
-----

SCF Done: E(RwB97XD) = -1711.11121947 A.U. after 1 cycles  
NFock= 1 Conv=0.46D-08 -V/T= 2.0038

Zero-point correction= 0.364755 (a.u.)  
Thermal correction to Energy= 0.395569  
Thermal correction to Enthalpy= 0.396513  
Thermal correction to Gibbs Free Energy= 0.302142  
Sum of electronic and zero-point Energies= -1710.746465  
Sum of electronic and thermal Energies= -1710.715651  
Sum of electronic and thermal Enthalpies= -1710.714706  
Sum of electronic and thermal Free Energies= -1710.809077

|       | E (Thermal)<br>KCal/Mol | CV<br>Cal/Mol-Kelvin | S<br>Cal/Mol-Kelvin |
|-------|-------------------------|----------------------|---------------------|
| Total | 248.223                 | 111.725              | 198.620             |

| Item                 | Value    | Threshold | Converged? |
|----------------------|----------|-----------|------------|
| Maximum Force        | 0.000006 | 0.000450  | YES        |
| RMS Force            | 0.000001 | 0.000300  | YES        |
| Maximum Displacement | 0.001077 | 0.001800  | YES        |
| RMS Displacement     | 0.000156 | 0.001200  | YES        |

Normal termination of Gaussian 16 at Wed Jan 12 04:55:02 2022.

-----Figure S3-2, TS8 -----

vita-b6ts5jy.high.log

Stoichiometry C11H22N2O11P(1-)

Standard orientation:

| Center<br>Number | Atomic<br>Number | Atomic<br>Type | Coordinates (Angstroms) |           |           |
|------------------|------------------|----------------|-------------------------|-----------|-----------|
|                  |                  |                | X                       | Y         | Z         |
| 1                | 6                | 0              | 2.686303                | -1.477387 | 0.066554  |
| 2                | 6                | 0              | 2.999183                | -2.812891 | -0.134220 |
| 3                | 7                | 0              | 2.096014                | -3.593192 | -0.759319 |
| 4                | 6                | 0              | 0.903007                | -3.142147 | -1.182729 |
| 5                | 6                | 0              | 0.551360                | -1.828815 | -1.012888 |
| 6                | 6                | 0              | 1.459044                | -0.933266 | -0.393763 |
| 7                | 6                | 0              | 4.292633                | -3.402253 | 0.316549  |
| 8                | 8                | 0              | 3.606182                | -0.740893 | 0.710253  |
| 9                | 6                | 0              | 1.105631                | 0.471978  | -0.215256 |
| 10               | 6                | 0              | -0.847018               | -1.420470 | -1.395075 |
| 11               | 8                | 0              | -1.588353               | -1.351419 | -0.197858 |
| 12               | 15               | 0              | -3.269131               | -1.305645 | -0.235199 |
| 13               | 8                | 0              | -3.631263               | 0.132344  | -0.646403 |
| 14               | 8                | 0              | -3.720115               | -2.364017 | -1.226874 |
| 15               | 8                | 0              | -3.578106               | -1.603912 | 1.240473  |
| 16               | 1                | 0              | 0.253229                | -3.869055 | -1.648983 |
| 17               | 1                | 0              | 4.384341                | -4.444639 | 0.011502  |
| 18               | 1                | 0              | 5.126964                | -2.836029 | -0.101705 |
| 19               | 1                | 0              | 4.371863                | -3.345750 | 1.404452  |
| 20               | 1                | 0              | 0.397531                | 0.861086  | -0.943150 |
| 21               | 1                | 0              | -0.853244               | -0.457445 | -1.920449 |
| 22               | 1                | 0              | -1.277860               | -2.167099 | -2.070161 |
| 23               | 1                | 0              | 2.325498                | -4.567016 | -0.910150 |
| 24               | 7                | 0              | 2.159204                | 1.307832  | 0.157327  |
| 25               | 6                | 0              | 2.253717                | 2.584545  | 0.083292  |
| 26               | 1                | 0              | 3.277566                | 0.200162  | 0.670475  |
| 27               | 6                | 0              | 1.206100                | 3.438527  | -0.541831 |
| 28               | 8                | 0              | 1.557147                | 4.725258  | -0.576296 |
| 29               | 8                | 0              | 0.145033                | 3.041144  | -0.982944 |
| 30               | 1                | 0              | 0.850872                | 5.232567  | -0.996937 |
| 31               | 6                | 0              | 3.477993                | 3.266062  | 0.630899  |
| 32               | 1                | 0              | 3.212608                | 3.982398  | 1.412769  |
| 33               | 1                | 0              | 4.151570                | 2.520021  | 1.051085  |
| 34               | 1                | 0              | 4.003977                | 3.819800  | -0.150711 |

|    |   |   |           |           |           |
|----|---|---|-----------|-----------|-----------|
| 35 | 1 | 0 | -3.071823 | 1.271467  | 0.333869  |
| 36 | 8 | 0 | -2.674596 | 1.962131  | 0.945195  |
| 37 | 1 | 0 | -1.297846 | 1.331449  | 1.447608  |
| 38 | 1 | 0 | -2.618809 | 2.774465  | 0.415749  |
| 39 | 8 | 0 | -0.492979 | 0.847258  | 1.815937  |
| 40 | 1 | 0 | 0.237885  | 0.573284  | 0.893578  |
| 41 | 1 | 0 | -0.857849 | 0.014321  | 2.231589  |
| 42 | 8 | 0 | -2.372159 | 4.192491  | -0.771646 |
| 43 | 1 | 0 | -1.494038 | 3.884990  | -1.047922 |
| 44 | 1 | 0 | -2.921732 | 4.150468  | -1.557035 |
| 45 | 8 | 0 | -1.632345 | -1.256298 | 2.919295  |
| 46 | 1 | 0 | -2.028789 | -1.061360 | 3.770517  |
| 47 | 1 | 0 | -2.396740 | -1.421885 | 2.283689  |

-----  
Standard basis: 6-311+G(d,p) (6D, 7F)

715 basis functions  
103 alpha electrons      103 beta electrons  
nuclear repulsion energy      2736.7900942579 Hartrees.  
NAtoms= 47 NActive= 47

Force inversion solution in PCM.

-----  
Polarizable Continuum Model (PCM)

Model : PCM.

Solvent : Water, Eps= 78.355300 Eps(inf)= 1.777849  
-----

SCF Done: E(RwB97XD) = -1711.06384110 A.U. after 1 cycles  
NFock= 1 Conv=0.19D-08 -V/T= 2.0039

Harmonic frequencies (cm\*\*<sup>-1</sup>), IR intensities (KM/Mole), Raman scattering

|                | 1          | 2        | 3       |
|----------------|------------|----------|---------|
|                | A          | A        | A       |
| Frequencies -- | -1394.2219 | -14.3640 | 27.0951 |

|       | E (Thermal)<br>KCal/Mol | CV<br>Cal/Mol-Kelvin | S<br>Cal/Mol-Kelvin |
|-------|-------------------------|----------------------|---------------------|
| Total | 244.076                 | 105.697              | 188.234             |

| Item                 | Value    | Threshold | Converged? |
|----------------------|----------|-----------|------------|
| Maximum Force        | 0.000004 | 0.000450  | YES        |
| RMS Force            | 0.000001 | 0.000300  | YES        |
| Maximum Displacement | 0.003486 | 0.001800  | NO         |
| RMS Displacement     | 0.000793 | 0.001200  | YES        |

Normal termination of Gaussian 16 at Thu Nov 11 21:16:02 2021.

-----Figure S3-3, Int8 -----

vita-b6for5j.high.log

Stoichiometry C11H22N2O11P(1-)

Standard orientation:

| Center<br>Number | Atomic<br>Number | Atomic<br>Type | Coordinates (Angstroms) |           |           |
|------------------|------------------|----------------|-------------------------|-----------|-----------|
|                  |                  |                | X                       | Y         | Z         |
| 1                | 6                | 0              | 3.122156                | -0.250922 | 0.366866  |
| 2                | 6                | 0              | 4.050414                | -1.254124 | 0.072649  |
| 3                | 7                | 0              | 3.649007                | -2.266408 | -0.705768 |
| 4                | 6                | 0              | 2.413504                | -2.378112 | -1.218917 |
| 5                | 6                | 0              | 1.472194                | -1.409256 | -0.965173 |
| 6                | 6                | 0              | 1.821808                | -0.309850 | -0.161866 |
| 7                | 6                | 0              | 5.442795                | -1.227370 | 0.598998  |
| 8                | 8                | 0              | 3.556227                | 0.724681  | 1.171838  |
| 9                | 6                | 0              | 0.797754                | 0.761111  | 0.144868  |
| 10               | 6                | 0              | 0.077630                | -1.612336 | -1.497955 |
| 11               | 8                | 0              | -0.741776               | -1.950236 | -0.406163 |
| 12               | 15               | 0              | -2.388584               | -2.220277 | -0.686286 |
| 13               | 8                | 0              | -2.996311               | -0.826515 | -0.902462 |
| 14               | 8                | 0              | -2.464183               | -3.124940 | -1.906188 |
| 15               | 8                | 0              | -2.803753               | -2.869375 | 0.639143  |
| 16               | 1                | 0              | 2.219880                | -3.253252 | -1.821690 |
| 17               | 1                | 0              | 6.040107                | -2.042115 | 0.190621  |
| 18               | 1                | 0              | 5.914062                | -0.275972 | 0.346195  |

|    |   |   |           |           |           |
|----|---|---|-----------|-----------|-----------|
| 19 | 1 | 0 | 5.430717  | -1.307523 | 1.688272  |
| 20 | 1 | 0 | 0.067705  | 0.821655  | -0.664121 |
| 21 | 1 | 0 | -0.279114 | -0.704392 | -2.001998 |
| 22 | 1 | 0 | 0.083071  | -2.414677 | -2.243097 |
| 23 | 1 | 0 | 4.319443  | -2.996154 | -0.917905 |
| 24 | 7 | 0 | 1.457265  | 2.025170  | 0.426350  |
| 25 | 6 | 0 | 1.044085  | 3.155560  | 0.038698  |
| 26 | 1 | 0 | 2.889164  | 1.459345  | 1.115792  |
| 27 | 6 | 0 | -0.247299 | 3.334873  | -0.738448 |
| 28 | 8 | 0 | -0.080386 | 4.098449  | -1.805787 |
| 29 | 8 | 0 | -1.297862 | 2.854191  | -0.393121 |
| 30 | 1 | 0 | -0.924957 | 4.202768  | -2.266775 |
| 31 | 6 | 0 | 1.799476  | 4.408193  | 0.355370  |
| 32 | 1 | 0 | 1.152328  | 5.120596  | 0.874025  |
| 33 | 1 | 0 | 2.659037  | 4.174528  | 0.981214  |
| 34 | 1 | 0 | 2.134230  | 4.884631  | -0.569029 |
| 35 | 1 | 0 | -3.427477 | 0.085942  | 0.405745  |
| 36 | 8 | 0 | -3.666080 | 0.650590  | 1.189776  |
| 37 | 1 | 0 | -2.110342 | 0.534540  | 2.138693  |
| 38 | 1 | 0 | -3.890243 | 1.514892  | 0.814859  |
| 39 | 8 | 0 | -1.287800 | 0.336493  | 2.626456  |
| 40 | 1 | 0 | 0.232051  | 0.469600  | 1.044553  |
| 41 | 1 | 0 | -1.346045 | -0.621108 | 2.796394  |
| 42 | 8 | 0 | -4.084510 | 3.173365  | -0.126021 |
| 43 | 1 | 0 | -3.163737 | 3.186684  | -0.423132 |
| 44 | 1 | 0 | -4.611722 | 3.117267  | -0.925613 |
| 45 | 8 | 0 | -1.605616 | -2.436871 | 2.921894  |
| 46 | 1 | 0 | -2.237653 | -2.694269 | 3.594982  |
| 47 | 1 | 0 | -2.056363 | -2.615436 | 2.046773  |

-----  
Standard basis: 6-311+G(d,p) (6D, 7F)

715 basis functions  
103 alpha electrons      103 beta electrons  
nuclear repulsion energy      2694.6971958144 Hartrees.  
NAtoms= 47 NActive= 47

Force inversion solution in PCM.

-----  
Polarizable Continuum Model (PCM)

Model : PCM.  
Atomic radii : UFF (Universal Force Field).

Solvent : Water, Eps= 78.355300 Eps(inf)= 1.777849  
-----

SCF Done: E(RwB97XD) = -1711.08797455 A.U. after 2 cycles  
NFock= 2 Conv=0.69D-09 -V/T= 2.0039

|                                              |                 |
|----------------------------------------------|-----------------|
| Zero-point correction=                       | 0.365398 (a.u.) |
| Thermal correction to Energy=                | 0.396706        |
| Thermal correction to Enthalpy=              | 0.397650        |
| Thermal correction to Gibbs Free Energy=     | 0.300720        |
| Sum of electronic and zero-point Energies=   | -1710.722577    |
| Sum of electronic and thermal Energies=      | -1710.691269    |
| Sum of electronic and thermal Enthalpies=    | -1710.690324    |
| Sum of electronic and thermal Free Energies= | -1710.787254    |

|       | E (Thermal) | CV             | S              |
|-------|-------------|----------------|----------------|
|       | KCal/Mol    | Cal/Mol-Kelvin | Cal/Mol-Kelvin |
| Total | 248.937     | 111.405        | 204.006        |

| Item                 | Value    | Threshold | Converged? |
|----------------------|----------|-----------|------------|
| Maximum Force        | 0.000035 | 0.000450  | YES        |
| RMS Force            | 0.000007 | 0.000300  | YES        |
| Maximum Displacement | 0.006286 | 0.001800  | NO         |
| RMS Displacement     | 0.000965 | 0.001200  | YES        |

Normal termination of Gaussian 16 at Wed Jan 12 11:00:45 2022.

-----Figure S3-4, TS9 -----

vita-b6tsohx1.high.log

Stoichiometry C11H22N2O11P(1-)

Standard orientation:  
-----

| Center<br>Number | Atomic<br>Number | Atomic<br>Type | Coordinates (Angstroms) |           |           |
|------------------|------------------|----------------|-------------------------|-----------|-----------|
|                  |                  |                | X                       | Y         | Z         |
| 1                | 6                | 0              | -3.019713               | -0.998976 | -0.202120 |
| 2                | 6                | 0              | -4.265676               | -0.401539 | 0.101810  |
| 3                | 7                | 0              | -4.371129               | 0.930977  | 0.049593  |
| 4                | 6                | 0              | -3.366521               | 1.765891  | -0.270392 |
| 5                | 6                | 0              | -2.129881               | 1.247308  | -0.576439 |
| 6                | 6                | 0              | -1.945370               | -0.140356 | -0.541860 |
| 7                | 6                | 0              | -5.449219               | -1.225546 | 0.468495  |
| 8                | 8                | 0              | -2.912579               | -2.293901 | -0.162784 |
| 9                | 6                | 0              | -0.583391               | -0.695973 | -0.890429 |
| 10               | 6                | 0              | -1.006738               | 2.189570  | -0.932165 |
| 11               | 8                | 0              | -0.008534               | 2.121845  | 0.064689  |
| 12               | 15               | 0              | 1.469789                | 2.954620  | -0.220019 |
| 13               | 8                | 0              | 2.293452                | 2.457153  | 0.973640  |
| 14               | 8                | 0              | 1.937578                | 2.458537  | -1.581932 |
| 15               | 8                | 0              | 1.104775                | 4.432052  | -0.160228 |
| 16               | 1                | 0              | -3.593548               | 2.821577  | -0.267269 |
| 17               | 1                | 0              | -6.326737               | -0.609971 | 0.667468  |
| 18               | 1                | 0              | -5.679379               | -1.923176 | -0.339876 |
| 19               | 1                | 0              | -5.223331               | -1.822978 | 1.354650  |
| 20               | 1                | 0              | 0.191275                | -0.153769 | -0.347105 |
| 21               | 1                | 0              | -0.577737               | 1.911835  | -1.902540 |
| 22               | 1                | 0              | -1.396536               | 3.209372  | -1.019805 |
| 23               | 1                | 0              | -5.271484               | 1.340652  | 0.269559  |
| 24               | 7                | 0              | -0.525899               | -2.119115 | -0.576732 |
| 25               | 6                | 0              | 0.512341                | -2.833739 | -0.412102 |
| 26               | 1                | 0              | -1.614716               | -2.465897 | -0.367518 |
| 27               | 6                | 0              | 1.893819                | -2.263775 | -0.685483 |
| 28               | 8                | 0              | 2.839183                | -2.930659 | -0.062479 |
| 29               | 8                | 0              | 2.071679                | -1.333675 | -1.431874 |
| 30               | 1                | 0              | 3.704426                | -2.475901 | -0.221476 |
| 31               | 6                | 0              | 0.396631                | -4.254376 | 0.010801  |
| 32               | 1                | 0              | 0.901036                | -4.372801 | 0.972173  |
| 33               | 1                | 0              | -0.646411               | -4.552164 | 0.101334  |
| 34               | 1                | 0              | 0.906630                | -4.901507 | -0.706218 |
| 35               | 1                | 0              | 3.012658                | 1.016442  | 1.224629  |
| 36               | 8                | 0              | 3.412705                | 0.147951  | 1.507993  |
| 37               | 1                | 0              | 1.985272                | -0.886873 | 1.831511  |
| 38               | 1                | 0              | 3.964168                | -0.169291 | 0.783954  |
| 39               | 8                | 0              | 1.144777                | -1.368807 | 1.960561  |
| 40               | 1                | 0              | -0.384895               | -0.550890 | -1.956877 |
| 41               | 1                | 0              | 0.503316                | -0.665108 | 2.156115  |
| 42               | 8                | 0              | 5.032743                | -1.426992 | -0.401239 |
| 43               | 1                | 0              | 5.149789                | -1.100048 | -1.297806 |
| 44               | 1                | 0              | 5.906305                | -1.680758 | -0.090841 |
| 45               | 8                | 0              | -0.537281               | 0.855093  | 2.413604  |
| 46               | 1                | 0              | -0.197676               | 1.366390  | 3.150758  |
| 47               | 1                | 0              | -0.325734               | 1.382792  | 1.615145  |

Standard basis: 6-311+G(d,p) (6D, 7F)

715 basis functions  
103 alpha electrons      103 beta electrons  
nuclear repulsion energy      2780.4405357676 Hartrees.  
NAtoms= 47 NActive= 47

Force inversion solution in PCM.

Polarizable Continuum Model (PCM)

Model : PCM.  
Atomic radii : UFF (Universal Force Field).

Solvent : Water, Eps= 78.355300 Eps(inf)= 1.777849

SCF Done: E(RwB97XD) = -1711.08630605 A.U. after 2 cycles  
NFock= 2 Conv=0.32D-09 -V/T= 2.0039

Harmonic frequencies (cm\*\*<sup>-1</sup>), IR intensities (KM/Mole), Raman

|                | 1         | 2       | 3       |
|----------------|-----------|---------|---------|
|                | A         | A       | A       |
| Frequencies -- | -573.7087 | 24.5837 | 34.2348 |

Zero-point correction= 0.361950 (a.u.)  
Thermal correction to Energy= 0.392880  
Thermal correction to Enthalpy= 0.393824

Thermal correction to Gibbs Free Energy= 0.299120  
 Sum of electronic and zero-point Energies= -1710.724356  
 Sum of electronic and thermal Energies= -1710.693426  
 Sum of electronic and thermal Enthalpies= -1710.692482  
 Sum of electronic and thermal Free Energies= -1710.787186

|       | E (Thermal)<br>KCal/Mol | CV<br>Cal/Mol-Kelvin | S<br>Cal/Mol-Kelvin |
|-------|-------------------------|----------------------|---------------------|
| Total | 246.536                 | 110.379              | 199.320             |

| Item                 | Value    | Threshold | Converged? |
|----------------------|----------|-----------|------------|
| Maximum Force        | 0.000001 | 0.000450  | YES        |
| RMS Force            | 0.000000 | 0.000300  | YES        |
| Maximum Displacement | 0.000315 | 0.001800  | YES        |
| RMS Displacement     | 0.000053 | 0.001200  | YES        |

Normal termination of Gaussian 16 at Thu Jan 13 05:38:04 2022.

-----Figure S3-5, Int9 -----

vita-b6revohx1.high.log

Stoichiometry C11H22N2O11P(1-)

Standard orientation:

| Center<br>Number | Atomic<br>Number | Atomic<br>Type | Coordinates (Angstroms) |           |           |
|------------------|------------------|----------------|-------------------------|-----------|-----------|
|                  |                  |                | X                       | Y         | Z         |
| 1                | 6                | 0              | -3.053420               | -1.003826 | -0.238481 |
| 2                | 6                | 0              | -4.275752               | -0.370413 | 0.117108  |
| 3                | 7                | 0              | -4.348905               | 0.963848  | 0.096806  |
| 4                | 6                | 0              | -3.333713               | 1.782096  | -0.234386 |
| 5                | 6                | 0              | -2.119051               | 1.237758  | -0.582199 |
| 6                | 6                | 0              | -1.966480               | -0.153781 | -0.580727 |
| 7                | 6                | 0              | -5.471520               | -1.169934 | 0.497701  |
| 8                | 8                | 0              | -2.985633               | -2.290809 | -0.237101 |
| 9                | 6                | 0              | -0.621595               | -0.719494 | -0.980013 |
| 10               | 6                | 0              | -0.983114               | 2.163575  | -0.942492 |
| 11               | 8                | 0              | 0.019101                | 2.075505  | 0.049677  |
| 12               | 15               | 0              | 1.482599                | 2.941372  | -0.207822 |
| 13               | 8                | 0              | 2.301391                | 2.449844  | 0.991921  |
| 14               | 8                | 0              | 1.979223                | 2.467746  | -1.567585 |
| 15               | 8                | 0              | 1.084980                | 4.409954  | -0.139215 |
| 16               | 1                | 0              | -3.534127               | 2.842560  | -0.203854 |
| 17               | 1                | 0              | -6.316990               | -0.535498 | 0.765268  |
| 18               | 1                | 0              | -5.762943               | -1.819569 | -0.331006 |
| 19               | 1                | 0              | -5.228513               | -1.817980 | 1.342701  |
| 20               | 1                | 0              | 0.179822                | -0.149429 | -0.511469 |
| 21               | 1                | 0              | -0.564167               | 1.885508  | -1.917108 |
| 22               | 1                | 0              | -1.356074               | 3.190053  | -1.022240 |
| 23               | 1                | 0              | -5.231849               | 1.390633  | 0.351965  |
| 24               | 7                | 0              | -0.523120               | -2.126060 | -0.599738 |
| 25               | 6                | 0              | 0.522223                | -2.821873 | -0.386400 |
| 26               | 1                | 0              | -1.523674               | -2.507182 | -0.413787 |
| 27               | 6                | 0              | 1.898192                | -2.246861 | -0.677970 |
| 28               | 8                | 0              | 2.848173                | -2.903620 | -0.054586 |
| 29               | 8                | 0              | 2.063521                | -1.327920 | -1.439805 |
| 30               | 1                | 0              | 3.712562                | -2.448883 | -0.222940 |
| 31               | 6                | 0              | 0.415019                | -4.221611 | 0.094712  |
| 32               | 1                | 0              | 0.919372                | -4.289998 | 1.060819  |
| 33               | 1                | 0              | -0.624758               | -4.527098 | 0.196208  |
| 34               | 1                | 0              | 0.934935                | -4.891666 | -0.593396 |
| 35               | 1                | 0              | 3.005452                | 1.006000  | 1.247017  |
| 36               | 8                | 0              | 3.398353                | 0.132351  | 1.526333  |
| 37               | 1                | 0              | 1.972751                | -0.908887 | 1.812857  |
| 38               | 1                | 0              | 3.969228                | -0.170492 | 0.811294  |
| 39               | 8                | 0              | 1.130841                | -1.395014 | 1.918661  |
| 40               | 1                | 0              | -0.487277               | -0.637988 | -2.063446 |
| 41               | 1                | 0              | 0.485237                | -0.695261 | 2.117280  |
| 42               | 8                | 0              | 5.035768                | -1.404819 | -0.401571 |
| 43               | 1                | 0              | 5.149653                | -1.064312 | -1.293531 |
| 44               | 1                | 0              | 5.909815                | -1.666666 | -0.099253 |
| 45               | 8                | 0              | -0.538597               | 0.824392  | 2.397576  |
| 46               | 1                | 0              | -0.183886               | 1.329549  | 3.131896  |
| 47               | 1                | 0              | -0.321093               | 1.346809  | 1.597000  |

Standard basis: 6-311+G(d,p) (6D, 7F)

715 basis functions  
 103 alpha electrons      103 beta electrons  
 nuclear repulsion energy      2781.6610447787 Hartrees.  
 NAToms= 47 NActive= 47

Force inversion solution in PCM.

-----  
 Polarizable Continuum Model (PCM)  
 =====

Model                   : PCM.  
 Atomic radii           : UFF (Universal Force Field).

Solvent: Water, Eps= 78.355300 Eps(inf)= 1.777849  
 -----

SCF Done: E(RwB97XD) = -1711.08655986 A.U. after 2 cycles  
 NFock= 2 Conv=0.45D-09      -V/T= 2.0039

Zero-point correction=                   0.364524 (a.u.)  
 Thermal correction to Energy=           0.395749  
 Thermal correction to Enthalpy=         0.396693  
 Thermal correction to Gibbs Free Energy= 0.301559  
 Sum of electronic and zero-point Energies= -1710.722035  
 Sum of electronic and thermal Energies= -1710.690811  
 Sum of electronic and thermal Enthalpies= -1710.689867  
 Sum of electronic and thermal Free Energies= -1710.785001

|       | E (Thermal)<br>KCal/Mol | CV<br>Cal/Mol-Kelvin | S<br>Cal/Mol-Kelvin |
|-------|-------------------------|----------------------|---------------------|
| Total | 248.336                 | 111.578              | 200.226             |

| Item                 | Value    | Threshold | Converged? |
|----------------------|----------|-----------|------------|
| Maximum Force        | 0.000012 | 0.000450  | YES        |
| RMS Force            | 0.000003 | 0.000300  | YES        |
| Maximum Displacement | 0.001237 | 0.001800  | YES        |
| RMS Displacement     | 0.000303 | 0.001200  | YES        |

Normal termination of Gaussian 16 at Wed Jan 12 13:27:20 2022.

-----Figure S3-6, TS10-----

vita-b6tsohx.high.log

Stoichiometry C11H22N2O11P(1-)

Standard orientation:

| Center<br>Number | Atomic<br>Number | Atomic<br>Type | Coordinates (Angstroms) |           |           |
|------------------|------------------|----------------|-------------------------|-----------|-----------|
|                  |                  |                | X                       | Y         | Z         |
| 1                | 6                | 0              | -3.146670               | -0.958237 | -0.353453 |
| 2                | 6                | 0              | -4.354830               | -0.286880 | 0.012200  |
| 3                | 7                | 0              | -4.380554               | 1.048612  | 0.056797  |
| 4                | 6                | 0              | -3.330250               | 1.843655  | -0.215163 |
| 5                | 6                | 0              | -2.127353               | 1.268194  | -0.565145 |
| 6                | 6                | 0              | -2.017032               | -0.124741 | -0.625892 |
| 7                | 6                | 0              | -5.591179               | -1.054650 | 0.324526  |
| 8                | 8                | 0              | -3.126051               | -2.229760 | -0.421711 |
| 9                | 6                | 0              | -0.711635               | -0.764366 | -1.053263 |
| 10               | 6                | 0              | -0.960730               | 2.181677  | -0.849068 |
| 11               | 8                | 0              | -0.020397               | 2.067365  | 0.203627  |
| 12               | 15               | 0              | 1.529631                | 2.764497  | -0.022991 |
| 13               | 8                | 0              | 2.220564                | 2.276627  | 1.262953  |
| 14               | 8                | 0              | 2.058816                | 2.136672  | -1.303718 |
| 15               | 8                | 0              | 1.293138                | 4.265306  | -0.072719 |
| 16               | 1                | 0              | -3.493047               | 2.908253  | -0.139221 |
| 17               | 1                | 0              | -6.419757               | -0.400140 | 0.598198  |
| 18               | 1                | 0              | -5.884539               | -1.656461 | -0.539200 |
| 19               | 1                | 0              | -5.399124               | -1.749375 | 1.145588  |
| 20               | 1                | 0              | 0.114961                | -0.077638 | -0.879313 |
| 21               | 1                | 0              | -0.485283               | 1.915006  | -1.799530 |
| 22               | 1                | 0              | -1.311692               | 3.215652  | -0.929899 |
| 23               | 1                | 0              | -5.253105               | 1.495002  | 0.313424  |
| 24               | 7                | 0              | -0.463453               | -2.011488 | -0.340254 |
| 25               | 6                | 0              | 0.709255                | -2.453736 | 0.142636  |
| 26               | 1                | 0              | -1.321596               | -2.508881 | -0.105797 |
| 27               | 6                | 0              | 1.949404                | -2.183717 | -0.724483 |
| 28               | 8                | 0              | 3.052431                | -2.618761 | -0.140655 |
| 29               | 8                | 0              | 1.906143                | -1.655217 | -1.803929 |
| 30               | 1                | 0              | 3.831208                | -2.214720 | -0.584581 |

|    |   |   |           |           |           |
|----|---|---|-----------|-----------|-----------|
| 31 | 6 | 0 | 0.647760  | -3.858180 | 0.697201  |
| 32 | 1 | 0 | 1.558021  | -4.095325 | 1.241734  |
| 33 | 1 | 0 | -0.207439 | -3.947519 | 1.368062  |
| 34 | 1 | 0 | 0.529138  | -4.563403 | -0.128165 |
| 35 | 1 | 0 | 2.825014  | 0.886543  | 1.339614  |
| 36 | 8 | 0 | 3.191489  | -0.060957 | 1.439434  |
| 37 | 1 | 0 | 2.035145  | -1.011848 | 1.451470  |
| 38 | 1 | 0 | 3.835990  | -0.194334 | 0.731965  |
| 39 | 8 | 0 | 1.165348  | -1.567017 | 1.522328  |
| 40 | 1 | 0 | -0.751961 | -0.951970 | -2.133173 |
| 41 | 1 | 0 | 0.449812  | -0.906722 | 1.760137  |
| 42 | 8 | 0 | 4.937304  | -0.844567 | -0.821759 |
| 43 | 1 | 0 | 4.806269  | -0.339390 | -1.629108 |
| 44 | 1 | 0 | 5.887964  | -0.934020 | -0.713869 |
| 45 | 8 | 0 | -0.468163 | 0.352440  | 2.216522  |
| 46 | 1 | 0 | -0.160780 | 0.729139  | 3.044367  |
| 47 | 1 | 0 | -0.307034 | 1.043649  | 1.532786  |

-----  
Standard basis: 6-311+G(d,p) (6D, 7F)

715 basis functions  
103 alpha electrons      103 beta electrons  
nuclear repulsion energy      2831.8398641268 Hartrees.  
NAtoms= 47 NActive= 47

Nuclear repulsion after empirical dispersion term =  
2831.7987957203 Hartrees.  
Force inversion solution in PCM.

-----  
Polarizable Continuum Model (PCM)

Model : PCM.

Solvent: Water, Eps= 78.355300 Eps(inf)= 1.777849  
-----

SCF Done: E(RwB97XD) = -1711.07230209 A.U. after 2 cycles  
NFock= 2 Conv=0.86D-09 -V/T= 2.0039  
DoSCS=F DFT=T ScaleE2(SS,OS)= 1.000000 1.000000  
Range of M.O.s used for correlation: 1 713

Harmonic frequencies (cm<sup>-1</sup>), IR intensities (KM/Mole), Raman  

|                | 1         | 2       | 3       |
|----------------|-----------|---------|---------|
|                | A         | A       | A       |
| Frequencies -- | -161.4793 | 29.4588 | 36.2553 |

Zero-point correction= 0.365799 (a.u.)  
Thermal correction to Energy= 0.394869  
Thermal correction to Enthalpy= 0.395813  
Thermal correction to Gibbs Free Energy= 0.306582  
Sum of electronic and zero-point Energies= -1710.706503  
Sum of electronic and thermal Energies= -1710.677433  
Sum of electronic and thermal Enthalpies= -1710.676489  
Sum of electronic and thermal Free Energies= -1710.765720

|       | E (Thermal) | CV             | S              |
|-------|-------------|----------------|----------------|
|       | KCal/Mol    | Cal/Mol-Kelvin | Cal/Mol-Kelvin |
| Total | 247.784     | 106.832        | 187.803        |

| Item                 | Value    | Threshold | Converged? |
|----------------------|----------|-----------|------------|
| Maximum Force        | 0.000081 | 0.000450  | YES        |
| RMS Force            | 0.000018 | 0.000300  | YES        |
| Maximum Displacement | 0.002210 | 0.001800  | NO         |
| RMS Displacement     | 0.000540 | 0.001200  | YES        |

Normal termination of Gaussian 16 at Fri Nov 12 10:36:25 2021.

===== Figure S4 in Scheme 4d =====

-----Figure S4-1, Int10-----

vita-b6forhh.high.log

Stoichiometry C11H22N2O11P(1-)

-----  
Standard orientation:

| Center Number | Atomic Number | Atomic Type | Coordinates (Angstroms) |   |   |
|---------------|---------------|-------------|-------------------------|---|---|
|               |               |             | X                       | Y | Z |



|    |    |   |           |           |           |
|----|----|---|-----------|-----------|-----------|
| 1  | 6  | 0 | -2.698591 | 1.157043  | -0.296845 |
| 2  | 6  | 0 | -3.104124 | 2.526185  | -0.201089 |
| 3  | 7  | 0 | -2.212382 | 3.492886  | -0.440353 |
| 4  | 6  | 0 | -0.924388 | 3.289444  | -0.773119 |
| 5  | 6  | 0 | -0.459169 | 1.994663  | -0.882281 |
| 6  | 6  | 0 | -1.328119 | 0.929778  | -0.639614 |
| 7  | 6  | 0 | -4.502684 | 2.890174  | 0.154180  |
| 8  | 8  | 0 | -3.528316 | 0.221386  | -0.085651 |
| 9  | 6  | 0 | -0.886705 | -0.506013 | -0.738926 |
| 10 | 6  | 0 | 0.981958  | 1.788201  | -1.271804 |
| 11 | 8  | 0 | 1.664948  | 1.167888  | -0.191554 |
| 12 | 15 | 0 | 3.280691  | 0.884923  | -0.340120 |
| 13 | 8  | 0 | 3.485925  | -0.012041 | 0.978505  |
| 14 | 8  | 0 | 3.512149  | -0.009707 | -1.537250 |
| 15 | 8  | 0 | 4.020051  | 2.188722  | -0.270885 |
| 16 | 1  | 0 | -0.320283 | 4.169064  | -0.936458 |
| 17 | 1  | 0 | -4.638932 | 3.970290  | 0.224261  |
| 18 | 1  | 0 | -5.193839 | 2.493622  | -0.594028 |
| 19 | 1  | 0 | -4.772746 | 2.434254  | 1.109736  |
| 20 | 1  | 0 | -1.427647 | -0.971998 | -1.578161 |
| 21 | 1  | 0 | 1.048328  | 1.155419  | -2.164225 |
| 22 | 1  | 0 | 1.441412  | 2.752851  | -1.509741 |
| 23 | 1  | 0 | -2.529266 | 4.452304  | -0.366331 |
| 24 | 7  | 0 | -1.162868 | -1.203380 | 0.526273  |
| 25 | 6  | 0 | -0.694954 | -2.592054 | 0.588807  |
| 26 | 1  | 0 | -2.175093 | -1.170108 | 0.652478  |
| 27 | 6  | 0 | -1.231861 | -3.384587 | -0.628628 |
| 28 | 8  | 0 | -0.550881 | -3.886797 | -1.484734 |
| 29 | 8  | 0 | -2.567236 | -3.426001 | -0.638139 |
| 30 | 1  | 0 | -2.856854 | -3.906642 | -1.424657 |
| 31 | 6  | 0 | -1.212485 | -3.218902 | 1.879528  |
| 32 | 1  | 0 | -0.932153 | -4.272669 | 1.923014  |
| 33 | 1  | 0 | -0.751316 | -2.698925 | 2.720607  |
| 34 | 1  | 0 | -2.297102 | -3.137226 | 1.955280  |
| 35 | 1  | 0 | 0.179852  | -0.572004 | -0.943128 |
| 36 | 8  | 0 | 0.692544  | -2.657364 | 0.616912  |
| 37 | 1  | 0 | 3.084106  | 0.373747  | 1.792400  |
| 38 | 1  | 0 | 1.093213  | -2.521333 | -0.268948 |
| 39 | 8  | 0 | 2.241334  | 0.890561  | 3.182925  |
| 40 | 1  | 0 | 1.290643  | 0.688234  | 3.040296  |
| 41 | 1  | 0 | 2.285915  | 1.836551  | 3.336066  |
| 42 | 8  | 0 | 2.100319  | -2.249398 | -1.676567 |
| 43 | 1  | 0 | 1.584741  | -2.258479 | -2.484663 |
| 44 | 1  | 0 | 2.619096  | -1.405259 | -1.673971 |
| 45 | 8  | 0 | -0.376668 | 0.312903  | 2.747560  |
| 46 | 1  | 0 | -0.604884 | -0.230895 | 1.951751  |
| 47 | 1  | 0 | -0.897434 | -0.046004 | 3.468551  |

Standard basis: 6-311+G(d,p) (6D, 7F)

715 basis functions  
 103 alpha electrons 103 beta electrons  
 nuclear repulsion energy 2811.3768338519 Hartrees.  
 NAToms= 47 NActive= 47

Force inversion solution in PCM.

Polarizable Continuum Model (PCM)

Model : PCM.  
 Atomic radii : UFF (Universal Force Field).

Solvent : Water, Eps= 78.355300 Eps(inf)= 1.777849

SCF Done: E(RwB97XD) = -1711.11768876 A.U. after 1 cycles  
 NFock= 1 Conv=0.27D-08 -V/T= 2.0039

Zero-point correction= 0.368513 (a.u.)  
 Thermal correction to Energy= 0.398423  
 Thermal correction to Enthalpy= 0.399368  
 Thermal correction to Gibbs Free Energy= 0.306706  
 Sum of electronic and zero-point Energies= -1710.749175  
 Sum of electronic and thermal Energies= -1710.719265  
 Sum of electronic and thermal Enthalpies= -1710.718321  
 Sum of electronic and thermal Free Energies= -1710.810983

E (Thermal) CV S

|       |          |                |                |
|-------|----------|----------------|----------------|
|       | KCal/Mol | Cal/Mol-Kelvin | Cal/Mol-Kelvin |
| Total | 250.014  | 108.652        | 195.023        |

|                      |          |           |            |
|----------------------|----------|-----------|------------|
| Item                 | Value    | Threshold | Converged? |
| Maximum Force        | 0.000004 | 0.000450  | YES        |
| RMS Force            | 0.000001 | 0.000300  | YES        |
| Maximum Displacement | 0.001284 | 0.001800  | YES        |
| RMS Displacement     | 0.000281 | 0.001200  | YES        |

Normal termination of Gaussian 16 at Wed Jan 12 22:45:27 2022.

-----Figure S4-2, TS11 -----

vita-b6tshh.high.log

Stoichiometry C11H22N2O11P(1-)

Standard orientation:

| Center Number | Atomic Number | Atomic Type | Coordinates (Angstroms) |           |           |
|---------------|---------------|-------------|-------------------------|-----------|-----------|
|               |               |             | X                       | Y         | Z         |
| 1             | 6             | 0           | -2.624236               | 1.117875  | -0.171397 |
| 2             | 6             | 0           | -3.158623               | 2.441703  | -0.099324 |
| 3             | 7             | 0           | -2.362741               | 3.479606  | -0.368086 |
| 4             | 6             | 0           | -1.060398               | 3.390832  | -0.701373 |
| 5             | 6             | 0           | -0.474917               | 2.146883  | -0.788520 |
| 6             | 6             | 0           | -1.247154               | 1.013000  | -0.525915 |
| 7             | 6             | 0           | -4.584305               | 2.675055  | 0.255357  |
| 8             | 8             | 0           | -3.360368               | 0.107159  | 0.069512  |
| 9             | 6             | 0           | -0.676350               | -0.374315 | -0.656271 |
| 10            | 6             | 0           | 0.982813                | 2.056571  | -1.163189 |
| 11            | 8             | 0           | 1.681880                | 1.485659  | -0.072390 |
| 12            | 15            | 0           | 3.245176                | 0.976434  | -0.268240 |
| 13            | 8             | 0           | 3.357221                | 0.003890  | 0.977501  |
| 14            | 8             | 0           | 3.306551                | 0.157536  | -1.546822 |
| 15            | 8             | 0           | 4.159544                | 2.166894  | -0.175366 |
| 16            | 1             | 0           | -0.541350               | 4.319707  | -0.883167 |
| 17            | 1             | 0           | -4.831530               | 3.736979  | 0.279791  |
| 18            | 1             | 0           | -5.233449               | 2.175243  | -0.467703 |
| 19            | 1             | 0           | -4.797521               | 2.236081  | 1.232878  |
| 20            | 1             | 0           | -1.078880               | -0.841080 | -1.562004 |
| 21            | 1             | 0           | 1.108405                | 1.435143  | -2.057189 |
| 22            | 1             | 0           | 1.369859                | 3.054862  | -1.391956 |
| 23            | 1             | 0           | -2.768158               | 4.407077  | -0.316369 |
| 24            | 7             | 0           | -1.078127               | -1.205671 | 0.507960  |
| 25            | 6             | 0           | -0.624578               | -2.638041 | 0.467208  |
| 26            | 1             | 0           | -2.114685               | -1.118908 | 0.538070  |
| 27            | 6             | 0           | -1.213072               | -3.304792 | -0.796873 |
| 28            | 8             | 0           | -0.562690               | -3.913619 | -1.600548 |
| 29            | 8             | 0           | -2.531565               | -3.137916 | -0.861779 |
| 30            | 1             | 0           | -2.872405               | -3.574062 | -1.654249 |
| 31            | 6             | 0           | -1.163255               | -3.332276 | 1.713364  |
| 32            | 1             | 0           | -0.901051               | -4.389929 | 1.676103  |
| 33            | 1             | 0           | -0.693586               | -2.882454 | 2.588927  |
| 34            | 1             | 0           | -2.246346               | -3.234657 | 1.788985  |
| 35            | 1             | 0           | 0.407778                | -0.366546 | -0.713119 |
| 36            | 8             | 0           | 0.744822                | -2.705909 | 0.481215  |
| 37            | 1             | 0           | 2.827393                | 0.239773  | 1.853022  |
| 38            | 1             | 0           | 1.151643                | -2.525164 | -0.402520 |
| 39            | 8             | 0           | 2.091298                | 0.416164  | 3.075284  |
| 40            | 1             | 0           | 0.899166                | 0.165157  | 2.906443  |
| 41            | 1             | 0           | 2.171097                | 1.316490  | 3.394043  |
| 42            | 8             | 0           | 2.070058                | -2.142636 | -1.756250 |
| 43            | 1             | 0           | 1.591296                | -2.157590 | -2.586735 |
| 44            | 1             | 0           | 2.539264                | -1.264287 | -1.706767 |
| 45            | 8             | 0           | -0.232074               | -0.092163 | 2.708208  |
| 46            | 1             | 0           | -0.696702               | -0.760221 | 1.430832  |
| 47            | 1             | 0           | -0.614763               | -0.451102 | 3.510239  |

Standard basis: 6-311+G(d,p) (6D, 7F)

715 basis functions  
 103 alpha electrons      103 beta electrons  
 nuclear repulsion energy 2835.6629903179 Hartrees.  
 NAtoms= 47 NActive= 47

Force inversion solution in PCM.

Polarizable Continuum Model (PCM)

=====

Model : PCM.  
Atomic radii : UFF (Universal Force Field).

Solvent: Water, Eps= 78.355300 Eps(inf)= 1.777849

SCF Done: E(RwB97XD) = -1711.09705601 A.U. after 1 cycles  
NFock= 1 Conv=0.21D-08 -V/T= 2.0039  
DoSCS=F DFT=T ScaleE2(SS,OS)= 1.000000 1.000000  
Range of M.O.s used for correlation: 1 712

Harmonic frequencies (cm\*\*<sup>-1</sup>), IR intensities (KM/Mole), Raman

|                | 1         | 2       | 3       |
|----------------|-----------|---------|---------|
|                | A         | A       | A       |
| Frequencies -- | -828.6060 | 29.6838 | 38.3851 |

Zero-point correction= 0.362265 (a.u.)  
Thermal correction to Energy= 0.390552  
Thermal correction to Enthalpy= 0.391497  
Thermal correction to Gibbs Free Energy= 0.303575  
Sum of electronic and zero-point Energies= -1710.734791  
Sum of electronic and thermal Energies= -1710.706504  
Sum of electronic and thermal Enthalpies= -1710.705559  
Sum of electronic and thermal Free Energies= -1710.793481

|       | E (Thermal) | CV             | S              |
|-------|-------------|----------------|----------------|
|       | KCal/Mol    | Cal/Mol-Kelvin | Cal/Mol-Kelvin |
| Total | 245.075     | 104.541        | 185.047        |

| Item                 | Value    | Threshold | Converged? |
|----------------------|----------|-----------|------------|
| Maximum Force        | 0.000006 | 0.000450  | YES        |
| RMS Force            | 0.000001 | 0.000300  | YES        |
| Maximum Displacement | 0.000967 | 0.001800  | YES        |
| RMS Displacement     | 0.000132 | 0.001200  | YES        |

Normal termination of Gaussian 16 at Tue Dec 28 20:16:43 2021.

-----Figure S4-3, Int11 -----

vita-b6revhh.high.log

Stoichiometry C11H22N2O11P(1-)

Standard orientation:

| Center Number | Atomic Number | Atomic Type | Coordinates (Angstroms) |           |           |
|---------------|---------------|-------------|-------------------------|-----------|-----------|
|               |               |             | X                       | Y         | Z         |
| 1             | 6             | 0           | -2.592706               | 1.203547  | -0.180332 |
| 2             | 6             | 0           | -3.096439               | 2.534206  | -0.064287 |
| 3             | 7             | 0           | -2.266723               | 3.560633  | -0.265320 |
| 4             | 6             | 0           | -0.958797               | 3.450530  | -0.569628 |
| 5             | 6             | 0           | -0.400079               | 2.197407  | -0.694170 |
| 6             | 6             | 0           | -1.209365               | 1.075821  | -0.497237 |
| 7             | 6             | 0           | -4.525014               | 2.789063  | 0.262805  |
| 8             | 8             | 0           | -3.363814               | 0.201393  | -0.003732 |
| 9             | 6             | 0           | -0.664254               | -0.320573 | -0.653192 |
| 10            | 6             | 0           | 1.058764                | 2.085639  | -1.061192 |
| 11            | 8             | 0           | 1.757758                | 1.458400  | -0.008576 |
| 12            | 15            | 0           | 3.323053                | 0.915080  | -0.327403 |
| 13            | 8             | 0           | 3.653593                | 0.171672  | 0.970253  |
| 14            | 8             | 0           | 3.173688                | -0.014510 | -1.545641 |
| 15            | 8             | 0           | 4.166580                | 2.146582  | -0.607191 |
| 16            | 1             | 0           | -0.412759               | 4.372366  | -0.701762 |
| 17            | 1             | 0           | -4.748644               | 3.855187  | 0.312745  |
| 18            | 1             | 0           | -5.166447               | 2.325741  | -0.490540 |
| 19            | 1             | 0           | -4.772452               | 2.326918  | 1.221473  |
| 20            | 1             | 0           | -1.020036               | -0.749341 | -1.595206 |
| 21            | 1             | 0           | 1.161184                | 1.501221  | -1.984443 |
| 22            | 1             | 0           | 1.463693                | 3.084889  | -1.256591 |
| 23            | 1             | 0           | -2.649084               | 4.495631  | -0.182363 |
| 24            | 7             | 0           | -1.181718               | -1.171426 | 0.454535  |
| 25            | 6             | 0           | -0.791344               | -2.627691 | 0.429637  |
| 26            | 1             | 0           | -2.219911               | -1.015590 | 0.421538  |
| 27            | 6             | 0           | -1.303115               | -3.247928 | -0.889852 |
| 28            | 8             | 0           | -0.632419               | -3.928555 | -1.614370 |
| 29            | 8             | 0           | -2.585535               | -2.958355 | -1.092533 |
| 30            | 1             | 0           | -2.885186               | -3.374270 | -1.912244 |

|    |   |   |           |           |           |
|----|---|---|-----------|-----------|-----------|
| 31 | 6 | 0 | -1.478664 | -3.303072 | 1.611881  |
| 32 | 1 | 0 | -1.261216 | -4.370964 | 1.587749  |
| 33 | 1 | 0 | -1.074352 | -2.883937 | 2.534573  |
| 34 | 1 | 0 | -2.558498 | -3.155925 | 1.585615  |
| 35 | 1 | 0 | 0.422221  | -0.341424 | -0.633266 |
| 36 | 8 | 0 | 0.562757  | -2.754040 | 0.568187  |
| 37 | 1 | 0 | 2.819466  | 0.040467  | 2.304428  |
| 38 | 1 | 0 | 1.059353  | -2.596896 | -0.280952 |
| 39 | 8 | 0 | 2.320972  | -0.075420 | 3.168798  |
| 40 | 1 | 0 | 0.646320  | -0.033980 | 2.961309  |
| 41 | 1 | 0 | 2.662228  | 0.598288  | 3.759298  |
| 42 | 8 | 0 | 2.037514  | -2.305309 | -1.549940 |
| 43 | 1 | 0 | 1.598721  | -2.409600 | -2.395845 |
| 44 | 1 | 0 | 2.482637  | -1.396210 | -1.552870 |
| 45 | 8 | 0 | -0.329527 | -0.025516 | 2.805024  |
| 46 | 1 | 0 | -0.842613 | -0.778817 | 1.365598  |
| 47 | 1 | 0 | -0.737802 | -0.296817 | 3.629467  |

-----  
Standard basis: 6-311+G(d,p) (6D, 7F)

715 basis functions  
103 alpha electrons      103 beta electrons  
nuclear repulsion energy      2815.0097566279 Hartrees.  
NAtoms= 47 NActive= 47

Force inversion solution in PCM.

-----  
Polarizable Continuum Model (PCM)

Model : PCM.

Solvent : Water, Eps= 78.355300 Eps(inf)= 1.777849  
-----

SCF Done: E(RwB97XD) = -1711.11059629 A.U. after 1 cycles  
NFock= 1 Conv=0.22D-08 -V/T= 2.0039

Zero-point correction= 0.369228 (a.u.)  
Thermal correction to Energy= 0.398384  
Thermal correction to Enthalpy= 0.399328  
Thermal correction to Gibbs Free Energy= 0.308488  
Sum of electronic and zero-point Energies= -1710.741369  
Sum of electronic and thermal Energies= -1710.712212  
Sum of electronic and thermal Enthalpies= -1710.711268  
Sum of electronic and thermal Free Energies= -1710.802108

|       | E (Thermal) | CV             | S              |
|-------|-------------|----------------|----------------|
|       | KCal/Mol    | Cal/Mol-Kelvin | Cal/Mol-Kelvin |
| Total | 249.990     | 106.477        | 191.188        |

| Item                 | Value    | Threshold | Converged? |
|----------------------|----------|-----------|------------|
| Maximum Force        | 0.000012 | 0.000450  | YES        |
| RMS Force            | 0.000002 | 0.000300  | YES        |
| Maximum Displacement | 0.000511 | 0.001800  | YES        |
| RMS Displacement     | 0.000086 | 0.001200  | YES        |

Normal termination of Gaussian 16 at Wed Jan 12 18:27:08 2022.

-----Figure S4-4, TS12 -----

vita-b6ts7.high.log

Stoichiometry C11H22N2O11P(1-)

Standard orientation:

| Center Number | Atomic Number | Atomic Type | Coordinates (Angstroms) |           |           |
|---------------|---------------|-------------|-------------------------|-----------|-----------|
|               |               |             | X                       | Y         | Z         |
| 1             | 6             | 0           | 2.693570                | -1.059171 | -0.191411 |
| 2             | 6             | 0           | 3.246257                | -2.369036 | -0.047441 |
| 3             | 7             | 0           | 2.456314                | -3.430180 | -0.228819 |
| 4             | 6             | 0           | 1.146307                | -3.377430 | -0.538715 |
| 5             | 6             | 0           | 0.543179                | -2.148297 | -0.695058 |
| 6             | 6             | 0           | 1.307842                | -0.992629 | -0.522417 |
| 7             | 6             | 0           | 4.681654                | -2.565754 | 0.289773  |
| 8             | 8             | 0           | 3.420234                | -0.025579 | -0.029642 |
| 9             | 6             | 0           | 0.721198                | 0.380359  | -0.713367 |
| 10            | 6             | 0           | -0.915252               | -2.103550 | -1.073237 |

|    |    |   |           |           |           |
|----|----|---|-----------|-----------|-----------|
| 11 | 8  | 0 | -1.643894 | -1.466862 | -0.037574 |
| 12 | 15 | 0 | -3.244181 | -1.111415 | -0.306256 |
| 13 | 8  | 0 | -3.639341 | -0.358870 | 0.949501  |
| 14 | 8  | 0 | -3.210239 | -0.163859 | -1.574774 |
| 15 | 8  | 0 | -3.972683 | -2.382274 | -0.648382 |
| 16 | 1  | 0 | 0.636120  | -4.322143 | -0.651063 |
| 17 | 1  | 0 | 4.948648  | -3.622183 | 0.335763  |
| 18 | 1  | 0 | 5.308550  | -2.071452 | -0.455940 |
| 19 | 1  | 0 | 4.903089  | -2.099889 | 1.253165  |
| 20 | 1  | 0 | 1.123853  | 0.822476  | -1.629385 |
| 21 | 1  | 0 | -1.038555 | -1.551960 | -2.012931 |
| 22 | 1  | 0 | -1.288716 | -3.119501 | -1.232696 |
| 23 | 1  | 0 | 2.874484  | -4.347684 | -0.125652 |
| 24 | 7  | 0 | 1.132337  | 1.255783  | 0.418533  |
| 25 | 6  | 0 | 0.576445  | 2.673392  | 0.412627  |
| 26 | 1  | 0 | 2.172242  | 1.211338  | 0.412741  |
| 27 | 6  | 0 | 1.034765  | 3.354049  | -0.900972 |
| 28 | 8  | 0 | 0.328875  | 4.033855  | -1.592860 |
| 29 | 8  | 0 | 2.329779  | 3.134902  | -1.140427 |
| 30 | 1  | 0 | 2.588797  | 3.600275  | -1.947001 |
| 31 | 6  | 0 | 1.226441  | 3.401728  | 1.590379  |
| 32 | 1  | 0 | 0.886250  | 4.437693  | 1.593594  |
| 33 | 1  | 0 | 0.897611  | 2.924352  | 2.515041  |
| 34 | 1  | 0 | 2.315796  | 3.383128  | 1.536128  |
| 35 | 1  | 0 | -0.363515 | 0.376118  | -0.765541 |
| 36 | 8  | 0 | -0.764350 | 2.649509  | 0.557730  |
| 37 | 1  | 0 | -2.787582 | -0.175772 | 2.323554  |
| 38 | 1  | 0 | -1.334436 | 2.382552  | -0.331079 |
| 39 | 8  | 0 | -2.292232 | -0.043950 | 3.176542  |
| 40 | 1  | 0 | -0.597895 | -0.015252 | 2.947242  |
| 41 | 1  | 0 | -2.604293 | -0.732085 | 3.766772  |
| 42 | 8  | 0 | -2.144149 | 2.020253  | -1.343255 |
| 43 | 1  | 0 | -1.810174 | 2.363664  | -2.172814 |
| 44 | 1  | 0 | -2.730701 | 0.802009  | -1.463251 |
| 45 | 8  | 0 | 0.373192  | 0.019171  | 2.782585  |
| 46 | 1  | 0 | 0.815232  | 0.822087  | 1.315427  |
| 47 | 1  | 0 | 0.771398  | 0.331894  | 3.597277  |

-----  
Standard basis: 6-311+G(d,p) (6D, 7F)

715 basis functions  
103 alpha electrons      103 beta electrons  
nuclear repulsion energy      2823.3802694244 Hartrees.  
NAtoms= 47 NActive= 47

Force inversion solution in PCM.

-----  
Polarizable Continuum Model (PCM)

Model : PCM.

Solvent : Water, Eps= 78.355300 Eps(inf)= 1.777849  
-----

SCF Done: E(RwB97XD) = -1711.10355475 A.U. after 1 cycles  
NFock= 1 Conv=0.24D-08 -V/T= 2.0039

Harmonic frequencies (cm\*\*<sup>-1</sup>), IR intensities (KM/Mole), Raman

|                | 1         | 2       | 3       |
|----------------|-----------|---------|---------|
|                | A         | A       | A       |
| Frequencies -- | -401.4243 | 28.5113 | 32.6512 |

Zero-point correction= 0.363855 (a.u.)  
Thermal correction to Energy= 0.392462  
Thermal correction to Enthalpy= 0.393406  
Thermal correction to Gibbs Free Energy= 0.304452  
Sum of electronic and zero-point Energies= -1710.739699  
Sum of electronic and thermal Energies= -1710.711093  
Sum of electronic and thermal Enthalpies= -1710.710149  
Sum of electronic and thermal Free Energies= -1710.799103

|       | E (Thermal) | CV             | S              |
|-------|-------------|----------------|----------------|
|       | KCal/Mol    | Cal/Mol-Kelvin | Cal/Mol-Kelvin |
| Total | 246.273     | 104.844        | 187.219        |

| Item                 | Value    | Threshold | Converged? |
|----------------------|----------|-----------|------------|
| Maximum Force        | 0.000006 | 0.000450  | YES        |
| RMS Force            | 0.000001 | 0.000300  | YES        |
| Maximum Displacement | 0.000600 | 0.001800  | YES        |

RMS Displacement 0.000088 0.001200 YES

Normal termination of Gaussian 16 at Tue Dec 28 20:32:48 2021.

-----Figure S4-5, Int12-----

vita-b6revpmp.high.log

Stoichiometry C11H22N2O11P(1-)

Standard orientation:

| Center<br>Number | Atomic<br>Number | Atomic<br>Type | Coordinates (Angstroms) |           |           |
|------------------|------------------|----------------|-------------------------|-----------|-----------|
|                  |                  |                | X                       | Y         | Z         |
| 1                | 6                | 0              | 2.805440                | -0.881213 | -0.231066 |
| 2                | 6                | 0              | 3.426950                | -2.159398 | -0.071929 |
| 3                | 7                | 0              | 2.692385                | -3.263926 | -0.225781 |
| 4                | 6                | 0              | 1.378902                | -3.285897 | -0.523254 |
| 5                | 6                | 0              | 0.709698                | -2.091894 | -0.687821 |
| 6                | 6                | 0              | 1.410292                | -0.893763 | -0.534903 |
| 7                | 6                | 0              | 4.874377                | -2.276276 | 0.250866  |
| 8                | 8                | 0              | 3.479384                | 0.188991  | -0.103101 |
| 9                | 6                | 0              | 0.746713                | 0.445501  | -0.711060 |
| 10               | 6                | 0              | -0.749639               | -2.136315 | -1.061120 |
| 11               | 8                | 0              | -1.514917               | -1.515630 | -0.037230 |
| 12               | 15               | 0              | -3.145395               | -1.376715 | -0.242461 |
| 13               | 8                | 0              | -3.590711               | -0.572198 | 0.954483  |
| 14               | 8                | 0              | -3.272135               | -0.511905 | -1.595897 |
| 15               | 8                | 0              | -3.738018               | -2.725357 | -0.513875 |
| 16               | 1                | 0              | 0.919334                | -4.258112 | -0.617293 |
| 17               | 1                | 0              | 5.183463                | -3.316113 | 0.364595  |
| 18               | 1                | 0              | 5.470677                | -1.812525 | -0.538775 |
| 19               | 1                | 0              | 5.092182                | -1.735461 | 1.174813  |
| 20               | 1                | 0              | 1.123213                | 0.919706  | -1.622760 |
| 21               | 1                | 0              | -0.908054               | -1.612950 | -2.011132 |
| 22               | 1                | 0              | -1.068215               | -3.173992 | -1.193991 |
| 23               | 1                | 0              | 3.159422                | -4.155826 | -0.109622 |
| 24               | 7                | 0              | 1.086461                | 1.335337  | 0.425938  |
| 25               | 6                | 0              | 0.332796                | 2.707669  | 0.435735  |
| 26               | 1                | 0              | 2.116331                | 1.412263  | 0.419086  |
| 27               | 6                | 0              | 0.776217                | 3.400050  | -0.892770 |
| 28               | 8                | 0              | 0.019621                | 3.862095  | -1.705499 |
| 29               | 8                | 0              | 2.108383                | 3.444855  | -1.028580 |
| 30               | 1                | 0              | 2.325516                | 3.886609  | -1.860260 |
| 31               | 6                | 0              | 0.934397                | 3.480805  | 1.622441  |
| 32               | 1                | 0              | 0.502816                | 4.483185  | 1.636144  |
| 33               | 1                | 0              | 0.645424                | 2.969008  | 2.542736  |
| 34               | 1                | 0              | 2.022226                | 3.564851  | 1.577003  |
| 35               | 1                | 0              | -0.335861               | 0.374270  | -0.761761 |
| 36               | 8                | 0              | -0.960437               | 2.513005  | 0.520582  |
| 37               | 1                | 0              | -2.738426               | -0.225798 | 2.328187  |
| 38               | 1                | 0              | -1.861464               | 2.230104  | -0.699168 |
| 39               | 8                | 0              | -2.251610               | -0.014673 | 3.165120  |
| 40               | 1                | 0              | -0.537311               | -0.024519 | 2.965065  |
| 41               | 1                | 0              | -2.585775               | -0.630241 | 3.819995  |
| 42               | 8                | 0              | -2.495602               | 2.008654  | -1.458538 |
| 43               | 1                | 0              | -2.086984               | 2.395799  | -2.235224 |
| 44               | 1                | 0              | -2.969377               | 0.431500  | -1.519461 |
| 45               | 8                | 0              | 0.434116                | -0.007479 | 2.811959  |
| 46               | 1                | 0              | 0.817477                | 0.867159  | 1.315002  |
| 47               | 1                | 0              | 0.820942                | 0.343469  | 3.616526  |

Standard basis: 6-311+G(d,p) (6D, 7F)

715 basis functions

103 alpha electrons 103 beta electrons

nuclear repulsion energy 2808.8714265044 Hartrees.

NAtoms= 47 NActive= 47

Force inversion solution in PCM.

Polarizable Continuum Model (PCM)

Model : PCM.

Solvent : Water, Eps= 78.355300 Eps(inf)= 1.777849

SCF Done: E(RwB97XD) = -1711.10995294 A.U. after 2 cycles  
 NFock= 2 Conv=0.67D-09 -V/T= 2.0039

Zero-point correction= 0.368739 (a.u.)  
 Thermal correction to Energy= 0.398223  
 Thermal correction to Enthalpy= 0.399167  
 Thermal correction to Gibbs Free Energy= 0.308462  
 Sum of electronic and zero-point Energies= -1710.741214  
 Sum of electronic and thermal Energies= -1710.711730  
 Sum of electronic and thermal Enthalpies= -1710.710786  
 Sum of electronic and thermal Free Energies= -1710.801491

|       | E (Thermal)<br>KCal/Mol | CV<br>Cal/Mol-Kelvin | S<br>Cal/Mol-Kelvin |
|-------|-------------------------|----------------------|---------------------|
| Total | 249.889                 | 107.785              | 190.905             |

| Item                 | Value    | Threshold | Converged? |
|----------------------|----------|-----------|------------|
| Maximum Force        | 0.000133 | 0.000450  | YES        |
| RMS Force            | 0.000016 | 0.000300  | YES        |
| Maximum Displacement | 0.000574 | 0.001800  | YES        |
| RMS Displacement     | 0.000105 | 0.001200  | YES        |

Normal termination of Gaussian 16 at Wed Jan 12 22:18:50 2022.

-----Figure S4-6, TS13 -----

vita-b6tspmp.high.log

Stoichiometry C11H22N2O11P(1-)

Standard orientation:

| Center<br>Number | Atomic<br>Number | Atomic<br>Type | Coordinates (Angstroms) |           |           |
|------------------|------------------|----------------|-------------------------|-----------|-----------|
|                  |                  |                | X                       | Y         | Z         |
| 1                | 6                | 0              | 3.102566                | -0.153931 | -0.247248 |
| 2                | 6                | 0              | 3.984045                | -1.255721 | -0.008918 |
| 3                | 7                | 0              | 3.512670                | -2.504035 | -0.096638 |
| 4                | 6                | 0              | 2.243103                | -2.830057 | -0.401691 |
| 5                | 6                | 0              | 1.332525                | -1.820812 | -0.643226 |
| 6                | 6                | 0              | 1.744283                | -0.489951 | -0.553572 |
| 7                | 6                | 0              | 5.416929                | -1.035511 | 0.328442  |
| 8                | 8                | 0              | 3.526338                | 1.039350  | -0.185280 |
| 9                | 6                | 0              | 0.806304                | 0.671082  | -0.770793 |
| 10               | 6                | 0              | -0.067937               | -2.213202 | -1.037631 |
| 11               | 8                | 0              | -0.990864               | -1.745525 | -0.061133 |
| 12               | 15               | 0              | -2.580564               | -2.139723 | -0.228502 |
| 13               | 8                | 0              | -3.272325               | -1.339027 | 0.847581  |
| 14               | 8                | 0              | -2.951620               | -1.563053 | -1.690464 |
| 15               | 8                | 0              | -2.735280               | -3.628248 | -0.285995 |
| 16               | 1                | 0              | 2.009096                | -3.883276 | -0.442485 |
| 17               | 1                | 0              | 5.947793                | -1.974670 | 0.490842  |
| 18               | 1                | 0              | 5.909172                | -0.485011 | -0.477099 |
| 19               | 1                | 0              | 5.496937                | -0.421344 | 1.228786  |
| 20               | 1                | 0              | 1.149112                | 1.245993  | -1.636476 |
| 21               | 1                | 0              | -0.316220               | -1.780481 | -2.013310 |
| 22               | 1                | 0              | -0.136868               | -3.301246 | -1.127802 |
| 23               | 1                | 0              | 4.160808                | -3.262990 | 0.077852  |
| 24               | 7                | 0              | 0.773244                | 1.571881  | 0.385350  |
| 25               | 6                | 0              | -0.855228               | 2.920897  | 0.427756  |
| 26               | 1                | 0              | 1.708258                | 1.959001  | 0.509258  |
| 27               | 6                | 0              | -0.301342               | 3.554780  | -0.860118 |
| 28               | 8                | 0              | -0.700960               | 3.267568  | -1.960337 |
| 29               | 8                | 0              | 0.657921                | 4.452444  | -0.637328 |
| 30               | 1                | 0              | 0.967205                | 4.790478  | -1.488130 |
| 31               | 6                | 0              | -0.498541               | 3.566695  | 1.742751  |
| 32               | 1                | 0              | -1.136018               | 4.448022  | 1.864977  |
| 33               | 1                | 0              | -0.718148               | 2.865852  | 2.547974  |
| 34               | 1                | 0              | 0.541300                | 3.882558  | 1.791696  |
| 35               | 1                | 0              | -0.211621               | 0.336144  | -0.966947 |
| 36               | 8                | 0              | -1.874397               | 2.232555  | 0.320670  |
| 37               | 1                | 0              | -2.690862               | -0.905189 | 2.330988  |
| 38               | 1                | 0              | -2.457131               | 1.547078  | -1.136508 |
| 39               | 8                | 0              | -2.344079               | -0.626393 | 3.216093  |
| 40               | 1                | 0              | -0.676754               | -0.112952 | 3.077520  |
| 41               | 1                | 0              | -2.490797               | -1.373604 | 3.798737  |
| 42               | 8                | 0              | -2.778092               | 1.096054  | -1.949808 |
| 43               | 1                | 0              | -2.194791               | 1.435996  | -2.632974 |
| 44               | 1                | 0              | -2.884333               | -0.580588 | -1.764481 |

|    |   |   |          |          |          |
|----|---|---|----------|----------|----------|
| 45 | 8 | 0 | 0.250501 | 0.181661 | 2.955194 |
| 46 | 1 | 0 | 0.536989 | 1.055057 | 1.238708 |
| 47 | 1 | 0 | 0.456532 | 0.711389 | 3.727373 |

-----  
Standard basis: 6-311+G(d,p) (6D, 7F)

715 basis functions  
103 alpha electrons      103 beta electrons  
nuclear repulsion energy      2770.8113263616 Hartrees.  
NAtoms= 47 NActive= 47

Force inversion solution in PCM.

-----  
Polarizable Continuum Model (PCM)  
=====

Model : PCM.

Solvent: Water, Eps= 78.355300 Eps(inf)= 1.777849  
-----

SCF Done: E(RWB97XD) = -1711.10068062 A.U. after 2 cycles  
NFock= 2 Conv=0.76D-09 -V/T= 2.0039

Harmonic frequencies (cm\*\*<sup>-1</sup>), IR intensities (KM/Mole),  

|                |           |         |         |
|----------------|-----------|---------|---------|
|                | 1         | 2       | 3       |
|                | A         | A       | A       |
| Frequencies -- | -108.4551 | 19.5864 | 28.5878 |

|                                              |                 |
|----------------------------------------------|-----------------|
| Zero-point correction=                       | 0.366462 (a.u.) |
| Thermal correction to Energy=                | 0.396754        |
| Thermal correction to Enthalpy=              | 0.397699        |
| Thermal correction to Gibbs Free Energy=     | 0.304083        |
| Sum of electronic and zero-point Energies=   | -1710.734219    |
| Sum of electronic and thermal Energies=      | -1710.703926    |
| Sum of electronic and thermal Enthalpies=    | -1710.702982    |
| Sum of electronic and thermal Free Energies= | -1710.796597    |

|       |             |                |                |
|-------|-------------|----------------|----------------|
|       | E (Thermal) | CV             | S              |
|       | KCal/Mol    | Cal/Mol-Kelvin | Cal/Mol-Kelvin |
| Total | 248.967     | 109.241        | 197.030        |

|                      |          |           |            |
|----------------------|----------|-----------|------------|
| Item                 | Value    | Threshold | Converged? |
| Maximum Force        | 0.000025 | 0.000450  | YES        |
| RMS Force            | 0.000003 | 0.000300  | YES        |
| Maximum Displacement | 0.005086 | 0.001800  | NO         |
| RMS Displacement     | 0.000938 | 0.001200  | YES        |

Normal termination of Gaussian 16 at Thu Jan 13 04:00:16 2022.

-----Figure S4-7, Int13-----

vita-b6forpmp.high.log

Stoichiometry C11H22N2O11P(1-)

Standard orientation:

| Center Number | Atomic Number | Atomic Type | Coordinates (Angstroms) |           |           |
|---------------|---------------|-------------|-------------------------|-----------|-----------|
|               |               |             | X                       | Y         | Z         |
| 1             | 6             | 0           | 3.138999                | 0.577676  | -0.262913 |
| 2             | 6             | 0           | 4.236997                | -0.284917 | 0.047947  |
| 3             | 7             | 0           | 4.065055                | -1.611386 | 0.005147  |
| 4             | 6             | 0           | 2.913885                | -2.228497 | -0.315774 |
| 5             | 6             | 0           | 1.806740                | -1.461909 | -0.623465 |
| 6             | 6             | 0           | 1.900804                | -0.069498 | -0.585686 |
| 7             | 6             | 0           | 5.570835                | 0.265501  | 0.414380  |
| 8             | 8             | 0           | 3.281240                | 1.837176  | -0.244389 |
| 9             | 6             | 0           | 0.725301                | 0.837670  | -0.858490 |
| 10            | 6             | 0           | 0.544386                | -2.180105 | -1.024737 |
| 11            | 8             | 0           | -0.472606               | -1.947139 | -0.055174 |
| 12            | 15            | 0           | -1.906229               | -2.736757 | -0.227237 |
| 13            | 8             | 0           | -2.780871               | -2.163048 | 0.860232  |
| 14            | 8             | 0           | -2.424552               | -2.249332 | -1.678033 |
| 15            | 8             | 0           | -1.668963               | -4.212891 | -0.313897 |
| 16            | 1             | 0           | 2.925582                | -3.308132 | -0.316207 |
| 17            | 1             | 0           | 6.288645                | -0.523903 | 0.642612  |
| 18            | 1             | 0           | 5.962811                | 0.874459  | -0.404131 |
| 19            | 1             | 0           | 5.477216                | 0.921928  | 1.283027  |



|    |   |   |           |           |           |
|----|---|---|-----------|-----------|-----------|
| 20 | 1 | 0 | 0.962413  | 1.474537  | -1.716770 |
| 21 | 1 | 0 | 0.204448  | -1.824822 | -2.003679 |
| 22 | 1 | 0 | 0.739527  | -3.253169 | -1.108556 |
| 23 | 1 | 0 | 4.862650  | -2.194597 | 0.228886  |
| 24 | 7 | 0 | 0.412237  | 1.708444  | 0.275818  |
| 25 | 6 | 0 | -1.817337 | 2.805305  | 0.431608  |
| 26 | 1 | 0 | 1.232168  | 2.281969  | 0.459647  |
| 27 | 6 | 0 | -1.287162 | 3.324896  | -0.916834 |
| 28 | 8 | 0 | -1.539407 | 2.805493  | -1.975181 |
| 29 | 8 | 0 | -0.582693 | 4.446722  | -0.793835 |
| 30 | 1 | 0 | -0.285779 | 4.722925  | -1.670823 |
| 31 | 6 | 0 | -1.472517 | 3.558200  | 1.680177  |
| 32 | 1 | 0 | -2.143344 | 4.421578  | 1.746095  |
| 33 | 1 | 0 | -1.643484 | 2.915802  | 2.542863  |
| 34 | 1 | 0 | -0.449039 | 3.925014  | 1.668858  |
| 35 | 1 | 0 | -0.167805 | 0.265831  | -1.109271 |
| 36 | 8 | 0 | -2.628592 | 1.901308  | 0.416933  |
| 37 | 1 | 0 | -2.384752 | -1.528781 | 2.328724  |
| 38 | 1 | 0 | -3.013927 | 0.833226  | -0.995666 |
| 39 | 8 | 0 | -2.160412 | -1.126835 | 3.205611  |
| 40 | 1 | 0 | -0.679135 | -0.191234 | 3.083957  |
| 41 | 1 | 0 | -2.127966 | -1.857584 | 3.825418  |
| 42 | 8 | 0 | -3.073010 | 0.352314  | -1.841459 |
| 43 | 1 | 0 | -2.519766 | 0.898913  | -2.409436 |
| 44 | 1 | 0 | -2.654102 | -1.291056 | -1.713755 |
| 45 | 8 | 0 | 0.142067  | 0.330200  | 2.968113  |
| 46 | 1 | 0 | 0.244590  | 1.152706  | 1.116454  |
| 47 | 1 | 0 | 0.118251  | 0.998671  | 3.654917  |

-----  
Standard basis: 6-311+G(d,p) (6D, 7F)

715 basis functions  
103 alpha electrons      103 beta electrons  
nuclear repulsion energy      2744.4546944680 Hartrees.  
NAtoms= 47

Force inversion solution in PCM.

-----  
Polarizable Continuum Model (PCM)

=====  
Model : PCM.  
Atomic radii : UFF (Universal Force Field).

Solvent: Water, Eps= 78.355300 Eps(inf)= 1.777849  
-----

SCF Done: E(RwB97XD) = -1711.10138150 A.U. after 2 cycles  
NFock= 2 Conv=0.56D-09 -V/T= 2.0039

|                                              |                 |
|----------------------------------------------|-----------------|
| Zero-point correction=                       | 0.365973 (a.u.) |
| Thermal correction to Energy=                | 0.397651        |
| Thermal correction to Enthalpy=              | 0.398596        |
| Thermal correction to Gibbs Free Energy=     | 0.300532        |
| Sum of electronic and zero-point Energies=   | -1710.735409    |
| Sum of electronic and thermal Energies=      | -1710.703730    |
| Sum of electronic and thermal Enthalpies=    | -1710.702786    |
| Sum of electronic and thermal Free Energies= | -1710.800849    |

|       | E (Thermal) | CV             | S              |
|-------|-------------|----------------|----------------|
|       | KCal/Mol    | Cal/Mol-Kelvin | Cal/Mol-Kelvin |
| Total | 249.530     | 112.166        | 206.392        |

| Item                 | Value    | Threshold | Converged? |
|----------------------|----------|-----------|------------|
| Maximum Force        | 0.000007 | 0.000450  | YES        |
| RMS Force            | 0.000001 | 0.000300  | YES        |
| Maximum Displacement | 0.002031 | 0.001800  | NO         |
| RMS Displacement     | 0.000483 | 0.001200  | YES        |

Normal termination of Gaussian 16 at Thu Jan 13 00:05:19 2022.

-----Figure S4-8, Int14-----

vita-b6int13q.high.log

Stoichiometry C11H22N2O11P(1-)

Standard orientation:

-----  
Center      Atomic      Atomic      Coordinates (Angstroms)

| Number | Number | Type | X         | Y         | Z         |
|--------|--------|------|-----------|-----------|-----------|
| 1      | 6      | 0    | -3.421996 | -0.155082 | 0.742043  |
| 2      | 6      | 0    | -4.430595 | -0.195390 | -0.276287 |
| 3      | 7      | 0    | -4.102661 | 0.094286  | -1.539803 |
| 4      | 6      | 0    | -2.868135 | 0.425996  | -1.961459 |
| 5      | 6      | 0    | -1.836329 | 0.447148  | -1.044459 |
| 6      | 6      | 0    | -2.091862 | 0.136662  | 0.293391  |
| 7      | 6      | 0    | -5.842138 | -0.532824 | 0.053648  |
| 8      | 8      | 0    | -3.716284 | -0.375596 | 1.951238  |
| 9      | 6      | 0    | -1.019149 | 0.174258  | 1.350627  |
| 10     | 6      | 0    | -0.453949 | 0.785349  | -1.539594 |
| 11     | 8      | 0    | 0.082145  | 1.852698  | -0.763486 |
| 12     | 15     | 0    | 1.703332  | 2.095986  | -0.755235 |
| 13     | 8      | 0    | 1.946238  | 3.078304  | 0.351104  |
| 14     | 8      | 0    | 2.273639  | 0.646017  | -0.291664 |
| 15     | 8      | 0    | 2.175764  | 2.370935  | -2.161226 |
| 16     | 1      | 0    | -2.758597 | 0.655042  | -3.010755 |
| 17     | 1      | 0    | 1.839370  | 2.407962  | 2.016185  |
| 18     | 8      | 0    | 1.627248  | 1.972717  | 2.867466  |
| 19     | 1      | 0    | 0.668526  | 1.763579  | 2.768256  |
| 20     | 1      | 0    | 2.421496  | 0.505751  | 2.997095  |
| 21     | 8      | 0    | 2.849680  | -0.388075 | 3.053078  |
| 22     | 1      | 0    | 2.878372  | -0.618667 | 3.983861  |
| 23     | 1      | 0    | -4.841777 | 0.072676  | -2.232579 |
| 24     | 7      | 0    | -1.002057 | 1.445421  | 2.094119  |
| 25     | 1      | 0    | 2.122238  | -1.425082 | 2.086361  |
| 26     | 1      | 0    | -1.865618 | 1.533148  | 2.620309  |
| 27     | 8      | 0    | 1.548445  | -2.011790 | 1.501527  |
| 28     | 6      | 0    | 2.190329  | -2.457198 | 0.450894  |
| 29     | 8      | 0    | 3.365621  | -2.320958 | 0.216635  |
| 30     | 6      | 0    | 1.249067  | -3.219149 | -0.526714 |
| 31     | 8      | 0    | 1.748262  | -3.784423 | -1.465832 |
| 32     | 6      | 0    | -0.222262 | -3.192842 | -0.248460 |
| 33     | 1      | 0    | -0.754784 | -3.750158 | -1.017028 |
| 34     | 1      | 0    | -0.421800 | -3.618025 | 0.737945  |
| 35     | 1      | 0    | -0.029725 | 0.013401  | 0.924457  |
| 36     | 1      | 0    | -0.578661 | -2.159770 | -0.218698 |
| 37     | 1      | 0    | -1.203693 | -0.628429 | 2.066188  |
| 38     | 1      | 0    | 2.636081  | 0.144312  | -1.045643 |
| 39     | 1      | 0    | 0.193211  | -0.094488 | -1.452738 |
| 40     | 1      | 0    | -6.472519 | -0.569716 | -0.836001 |
| 41     | 1      | 0    | -0.487929 | 1.071568  | -2.594203 |
| 42     | 8      | 0    | 3.052737  | -0.094191 | -2.865291 |
| 43     | 1      | 0    | 2.830933  | 0.859383  | -2.898047 |
| 44     | 1      | 0    | 3.984753  | -0.158751 | -3.082372 |
| 45     | 1      | 0    | -5.883826 | -1.499932 | 0.560372  |
| 46     | 1      | 0    | -0.987293 | 2.204863  | 1.418581  |
| 47     | 1      | 0    | -6.251569 | 0.206918  | 0.746601  |

Standard basis: 6-311+G(d,p) (6D, 7F)

715 basis functions  
 103 alpha electrons      103 beta electrons  
 nuclear repulsion energy      2768.2749367387 Hartrees.  
 NAToms= 47 NActive= 47

Force inversion solution in PCM.

-----  
 Polarizable Continuum Model (PCM)

=====  
 Model                    : PCM.  
 Atomic radii            : UFF (Universal Force Field).

Solvent: Water, Eps= 78.355300 Eps(inf)= 1.777849  
 -----

SCF Done: E(RwB97XD) = -1711.11222211 A.U. after 2 cycles  
 NFock= 2 Conv=0.20D-08      -V/T= 2.0038

Zero-point correction=                    0.366871 (a.u.)  
 Thermal correction to Energy=            0.397813  
 Thermal correction to Enthalpy=         0.398758  
 Thermal correction to Gibbs Free Energy= 0.302594  
 Sum of electronic and zero-point Energies= -1710.745351  
 Sum of electronic and thermal Energies= -1710.714409  
 Sum of electronic and thermal Enthalpies= -1710.713465  
 Sum of electronic and thermal Free Energies= -1710.809628

|       |             |                |                |
|-------|-------------|----------------|----------------|
|       | E (Thermal) | CV             | S              |
|       | KCal/Mol    | Cal/Mol-Kelvin | Cal/Mol-Kelvin |
| Total | 249.632     | 109.831        | 202.393        |

|                      |          |           |            |
|----------------------|----------|-----------|------------|
| Item                 | Value    | Threshold | Converged? |
| Maximum Force        | 0.000025 | 0.000450  | YES        |
| RMS Force            | 0.000006 | 0.000300  | YES        |
| Maximum Displacement | 0.005832 | 0.001800  | NO         |
| RMS Displacement     | 0.000975 | 0.001200  | YES        |

Normal termination of Gaussian 16 at Sun Jan 23 21:07:04 2022.

===== Figure S5 =====

Two conformations (a) and (b) of the external aldimine in Int3 of Scheme 4b.

----- (a) -----

vita-b6.ext-ald.high.log

Stoichiometry C11H14N2O7P(1-)

Standard orientation:

| Center Number | Atomic Number | Atomic Type | Coordinates (Angstroms) |           |           |
|---------------|---------------|-------------|-------------------------|-----------|-----------|
|               |               |             | X                       | Y         | Z         |
| 1             | 6             | 0           | -1.302098               | 2.073847  | 0.085399  |
| 2             | 6             | 0           | -0.575849               | 3.320973  | -0.056866 |
| 3             | 7             | 0           | 0.742066                | 3.269861  | -0.136735 |
| 4             | 6             | 0           | 1.509282                | 2.141209  | -0.099754 |
| 5             | 6             | 0           | 0.909483                | 0.922123  | 0.034368  |
| 6             | 6             | 0           | -0.508832               | 0.870533  | 0.131857  |
| 7             | 6             | 0           | -1.285158               | 4.622111  | -0.112879 |
| 8             | 8             | 0           | -2.558223               | 2.094062  | 0.162080  |
| 9             | 6             | 0           | -1.168279               | -0.380959 | 0.284289  |
| 10            | 6             | 0           | 1.760417                | -0.325276 | 0.069987  |
| 11            | 8             | 0           | 3.118580                | -0.004335 | -0.021058 |
| 12            | 15            | 0           | 4.224072                | -1.311472 | -0.049052 |
| 13            | 8             | 0           | 3.870204                | -2.089551 | -1.314619 |
| 14            | 8             | 0           | 5.553513                | -0.571466 | -0.096405 |
| 15            | 8             | 0           | 3.952468                | -2.074126 | 1.245602  |
| 16            | 1             | 0           | 2.572303                | 2.273659  | -0.179722 |
| 17            | 1             | 0           | -0.592967               | 5.452094  | -0.233599 |
| 18            | 1             | 0           | -1.994878               | 4.623786  | -0.940751 |
| 19            | 1             | 0           | -1.866149               | 4.769454  | 0.798270  |
| 20            | 1             | 0           | -0.591766               | -1.295292 | 0.334902  |
| 21            | 1             | 0           | 1.557942                | -0.872586 | 0.998700  |
| 22            | 1             | 0           | 1.462711                | -0.981385 | -0.757752 |
| 23            | 1             | 0           | 1.234221                | 4.151431  | -0.235105 |
| 24            | 7             | 0           | -2.460296               | -0.494744 | 0.374934  |
| 25            | 6             | 0           | -3.172306               | -1.752942 | 0.556156  |
| 26            | 1             | 0           | -2.966572               | 0.405584  | 0.322234  |
| 27            | 6             | 0           | -4.048396               | -2.101565 | -0.647544 |
| 28            | 8             | 0           | -4.507255               | -3.202693 | -0.810597 |
| 29            | 8             | 0           | -4.268729               | -1.065033 | -1.460880 |
| 30            | 1             | 0           | -4.853069               | -1.347681 | -2.182279 |
| 31            | 1             | 0           | -2.433802               | -2.548582 | 0.636513  |
| 32            | 6             | 0           | -4.026676               | -1.714684 | 1.830004  |
| 33            | 1             | 0           | -3.385879               | -1.556285 | 2.694352  |
| 34            | 1             | 0           | -4.762351               | -0.912902 | 1.783304  |
| 35            | 1             | 0           | -4.547202               | -2.662107 | 1.946234  |

Standard basis: 6-311+G(2df,2p) (6D, 7F)

890 basis functions  
 83 alpha electrons      83 beta electrons  
 nuclear repulsion energy      1829.7059307346 Hartrees.  
 NAToms= 35 NActive= 35

Force inversion solution in PCM.

-----  
 Polarizable Continuum Model (PCM)

Model : PCM.  
 Atomic radii : UFF (Universal Force Field).

Solvent: Water, Eps= 78.355300 Eps(inf)= 1.777849

-----  
 SCF Done: E(RB3LYP) = -1405.73830722 A.U. after 1 cycles  
 NFock= 1 Conv=0.25D-08 -V/T= 2.0040

Zero-point correction= 0.261676 (a.u.)  
 Thermal correction to Energy= 0.282658  
 Thermal correction to Enthalpy= 0.283602  
 Thermal correction to Gibbs Free Energy= 0.208919  
 Sum of electronic and zero-point Energies= -1405.476631  
 Sum of electronic and thermal Energies= -1405.455650  
 Sum of electronic and thermal Enthalpies= -1405.454705  
 Sum of electronic and thermal Free Energies= -1405.529388

|       | E (Thermal)<br>KCal/Mol | CV<br>Cal/Mol-Kelvin | S<br>Cal/Mol-Kelvin |
|-------|-------------------------|----------------------|---------------------|
| Total | 177.370                 | 76.446               | 157.183             |

| Item                 | Value    | Threshold | Converged? |
|----------------------|----------|-----------|------------|
| Maximum Force        | 0.000016 | 0.000450  | YES        |
| RMS Force            | 0.000002 | 0.000300  | YES        |
| Maximum Displacement | 0.001207 | 0.001800  | YES        |
| RMS Displacement     | 0.000283 | 0.001200  | YES        |

Normal termination of Gaussian 16 at Fri Nov 26 14:32:38 2021.

----- (b) -----

vita-b6.ext-aldb.high.log

Stoichiometry C11H14N2O7P(1-)

Standard orientation:

| Center<br>Number | Atomic<br>Number | Atomic<br>Type | Coordinates (Angstroms) |           |           |
|------------------|------------------|----------------|-------------------------|-----------|-----------|
|                  |                  |                | X                       | Y         | Z         |
| 1                | 6                | 0              | 2.543233                | -0.068003 | 0.224583  |
| 2                | 6                | 0              | 3.576771                | -1.082403 | 0.132628  |
| 3                | 7                | 0              | 3.227922                | -2.307875 | -0.223895 |
| 4                | 6                | 0              | 1.961902                | -2.723790 | -0.517432 |
| 5                | 6                | 0              | 0.927036                | -1.833702 | -0.456153 |
| 6                | 6                | 0              | 1.202308                | -0.491964 | -0.084528 |
| 7                | 6                | 0              | 4.993958                | -0.761169 | 0.428871  |
| 8                | 8                | 0              | 2.856842                | 1.105625  | 0.556943  |
| 9                | 6                | 0              | 0.128245                | 0.449227  | -0.019966 |
| 10               | 6                | 0              | -0.470366               | -2.309198 | -0.787521 |
| 11               | 8                | 0              | -1.299124               | -2.219502 | 0.353634  |
| 12               | 15               | 0              | -2.914318               | -1.708191 | 0.138123  |
| 13               | 8                | 0              | -3.450423               | -1.794471 | 1.557878  |
| 14               | 8                | 0              | -2.771920               | -0.280495 | -0.408153 |
| 15               | 8                | 0              | -3.523586               | -2.688558 | -0.856778 |
| 16               | 1                | 0              | 1.855209                | -3.760834 | -0.785625 |
| 17               | 1                | 0              | 5.637642                | -1.630079 | 0.314579  |
| 18               | 1                | 0              | 5.341461                | 0.032520  | -0.233376 |
| 19               | 1                | 0              | 5.083535                | -0.380020 | 1.446729  |
| 20               | 1                | 0              | -0.903232               | 0.146226  | -0.232996 |
| 21               | 1                | 0              | -0.869854               | -1.707879 | -1.609030 |
| 22               | 1                | 0              | -0.416027               | -3.341847 | -1.141760 |
| 23               | 1                | 0              | 3.963311                | -3.004362 | -0.279632 |
| 24               | 7                | 0              | 0.314414                | 1.692980  | 0.308364  |
| 25               | 6                | 0              | -0.767780               | 2.666000  | 0.402101  |
| 26               | 1                | 0              | 1.289665                | 1.952801  | 0.517088  |
| 27               | 6                | 0              | -0.669819               | 3.752674  | -0.667098 |
| 28               | 8                | 0              | -1.550439               | 4.553258  | -0.855066 |
| 29               | 8                | 0              | 0.480331                | 3.733062  | -1.348965 |
| 30               | 1                | 0              | 0.473352                | 4.457890  | -1.994126 |
| 31               | 1                | 0              | -1.698881               | 2.131386  | 0.212753  |
| 32               | 6                | 0              | -0.808660               | 3.301529  | 1.796844  |
| 33               | 1                | 0              | -0.979464               | 2.530340  | 2.544537  |
| 34               | 1                | 0              | 0.127354                | 3.810999  | 2.023313  |
| 35               | 1                | 0              | -1.620046               | 4.023443  | 1.844507  |

-----  
 Standard basis: 6-311+G(2df,2p) (6D, 7F)

890 basis functions  
 83 alpha electrons 83 beta electrons  
 nuclear repulsion energy 1911.8204155953 Hartrees.  
 NAtoms= 35 NActive= 35

Force inversion solution in PCM.

-----  
Polarizable Continuum Model (PCM)  
=====

Model : PCM.  
Atomic radii : UFF (Universal Force Field).  
Polarization charges : Total charges.

Solvent : Water, Eps= 78.355300 Eps(inf)= 1.777849  
-----

SCF Done: E(RB3LYP) = -1405.74333803 A.U. after 1 cycles  
NFock= 1 Conv=0.11D-08 -V/T= 2.0040

Zero-point correction= 0.262161 (a.u.)  
Thermal correction to Energy= 0.282859  
Thermal correction to Enthalpy= 0.283803  
Thermal correction to Gibbs Free Energy= 0.210419  
Sum of electronic and zero-point Energies= -1405.481177  
Sum of electronic and thermal Energies= -1405.460479  
Sum of electronic and thermal Enthalpies= -1405.459535  
Sum of electronic and thermal Free Energies= -1405.532919

|       | E (Thermal)<br>KCal/Mol | CV<br>Cal/Mol-Kelvin | S<br>Cal/Mol-Kelvin |
|-------|-------------------------|----------------------|---------------------|
| Total | 177.497                 | 76.120               | 154.450             |

| Item                 | Value    | Threshold | Converged? |
|----------------------|----------|-----------|------------|
| Maximum Force        | 0.000035 | 0.000450  | YES        |
| RMS Force            | 0.000007 | 0.000300  | YES        |
| Maximum Displacement | 0.003507 | 0.001800  | NO         |
| RMS Displacement     | 0.000688 | 0.001200  | YES        |

Normal termination of Gaussian 16 at Fri Nov 26 15:02:43 2021.

=====Figure S6=====

----- TS(Int3 -> Int9), TS of the H[1,3]migration-----

vita-b6ts.int3-9a.high.log

Stoichiometry C11H22N2O11P(1-)

Standard orientation:

| Center<br>Number | Atomic<br>Number | Atomic<br>Type | Coordinates (Angstroms) |           |           |
|------------------|------------------|----------------|-------------------------|-----------|-----------|
|                  |                  |                | X                       | Y         | Z         |
| 1                | 6                | 0              | -1.387106               | 1.492134  | -0.499156 |
| 2                | 6                | 0              | -0.748317               | 2.422650  | -1.377961 |
| 3                | 7                | 0              | 0.363351                | 2.058927  | -2.009165 |
| 4                | 6                | 0              | 0.972008                | 0.863470  | -1.892453 |
| 5                | 6                | 0              | 0.425493                | -0.084497 | -1.065983 |
| 6                | 6                | 0              | -0.752848               | 0.224591  | -0.368811 |
| 7                | 6                | 0              | -1.309548               | 3.784312  | -1.581006 |
| 8                | 8                | 0              | -2.450139               | 1.839253  | 0.115240  |
| 9                | 6                | 0              | -1.275037               | -0.784455 | 0.595381  |
| 10               | 6                | 0              | 1.092847                | -1.442757 | -0.965379 |
| 11               | 8                | 0              | 2.437366                | -1.434081 | -1.349980 |
| 12               | 15               | 0              | 3.622429                | -0.987780 | -0.210169 |
| 13               | 8                | 0              | 4.880737                | -1.603894 | -0.790436 |
| 14               | 8                | 0              | 3.621076                | 0.548564  | -0.204380 |
| 15               | 8                | 0              | 3.135750                | -1.593757 | 1.112037  |
| 16               | 1                | 0              | 1.892447                | 0.716468  | -2.432442 |
| 17               | 1                | 0              | -0.722497               | 4.362278  | -2.295293 |
| 18               | 1                | 0              | -2.339233               | 3.711276  | -1.937891 |
| 19               | 1                | 0              | -1.337733               | 4.317164  | -0.627437 |
| 20               | 1                | 0              | -0.567486               | -1.164642 | 1.350561  |
| 21               | 1                | 0              | 0.998482                | -1.830576 | 0.053825  |
| 22               | 1                | 0              | 0.560564                | -2.131444 | -1.633432 |
| 23               | 1                | 0              | 0.801641                | 2.744400  | -2.613765 |
| 24               | 7                | 0              | -2.634466               | -0.625621 | 1.149911  |
| 25               | 6                | 0              | -2.778256               | -1.821318 | 0.443899  |
| 26               | 1                | 0              | -3.044385               | 0.197626  | 0.686894  |
| 27               | 1                | 0              | -1.389622               | -1.791111 | -0.073350 |
| 28               | 6                | 0              | -3.473943               | -1.846135 | -0.925987 |
| 29               | 8                | 0              | -4.013094               | -2.835317 | -1.327498 |
| 30               | 8                | 0              | -3.410733               | -0.673441 | -1.523902 |
| 31               | 1                | 0              | -3.854753               | -0.710252 | -2.382690 |

|    |   |   |           |           |          |
|----|---|---|-----------|-----------|----------|
| 32 | 6 | 0 | -2.759579 | -3.097501 | 1.211587 |
| 33 | 1 | 0 | -2.080841 | -3.017872 | 2.059414 |
| 34 | 1 | 0 | -3.775698 | -3.224669 | 1.599471 |
| 35 | 1 | 0 | -2.513807 | -3.951794 | 0.584390 |
| 36 | 8 | 0 | 0.951029  | -1.256084 | 2.618411 |
| 37 | 1 | 0 | 0.855135  | -0.302225 | 2.794529 |
| 38 | 1 | 0 | 1.773124  | -1.345612 | 2.077292 |
| 39 | 8 | 0 | 0.604814  | 1.496802  | 2.905114 |
| 40 | 1 | 0 | -0.292785 | 1.868065  | 2.847984 |
| 41 | 1 | 0 | 1.088922  | 1.844316  | 2.127840 |
| 42 | 8 | 0 | -1.980443 | 2.583377  | 2.672319 |
| 43 | 1 | 0 | -2.007325 | 3.539073  | 2.749794 |
| 44 | 1 | 0 | -2.220541 | 2.386844  | 1.742121 |
| 45 | 8 | 0 | 2.031595  | 2.374076  | 0.739224 |
| 46 | 1 | 0 | 2.627734  | 3.098032  | 0.937919 |
| 47 | 1 | 0 | 2.612074  | 1.641257  | 0.377610 |

-----  
Standard basis: 6-311+G(d,p) (6D, 7F)

715 basis functions  
103 alpha electrons      103 beta electrons  
nuclear repulsion energy      2820.6819496994 Hartrees.  
NAtoms= 47 NActive= 47

Force inversion solution in PCM.

-----  
Polarizable Continuum Model (PCM)  
=====

Model : PCM.  
Atomic radii : UFF (Universal Force Field).

Solvent : Water, Eps= 78.355300 Eps(inf)= 1.777849  
-----

SCF Done: E(RwB97XD) = -1710.99408514 A.U. after 2 cycles

Harmonic frequencies (cm<sup>-1</sup>), IR intensities (KM/Mole), Raman

|                | 1         | 2       | 3       |
|----------------|-----------|---------|---------|
|                | A         | A       | A       |
| Frequencies -- | -464.3921 | 24.2984 | 30.4606 |

Zero-point correction= 0.362479 (a.u.)  
Thermal correction to Energy= 0.392463  
Thermal correction to Enthalpy= 0.393408  
Thermal correction to Gibbs Free Energy= 0.300720  
Sum of electronic and zero-point Energies= -1710.631607  
Sum of electronic and thermal Energies= -1710.601622  
Sum of electronic and thermal Enthalpies= -1710.600678  
Sum of electronic and thermal Free Energies= -1710.693365

|       | E (Thermal) | CV             | S              |
|-------|-------------|----------------|----------------|
|       | KCal/Mol    | Cal/Mol-Kelvin | Cal/Mol-Kelvin |
| Total | 246.274     | 108.996        | 195.078        |

| Item                 | Value    | Threshold | Converged? |
|----------------------|----------|-----------|------------|
| Maximum Force        | 0.000020 | 0.000450  | YES        |
| RMS Force            | 0.000004 | 0.000300  | YES        |
| Maximum Displacement | 0.008472 | 0.001800  | NO         |
| RMS Displacement     | 0.001405 | 0.001200  | NO         |

Normal termination of Gaussian 16 at Sun Jun 5 05:49:49 2022.
